# Supplementary material for: Spin population determines whether antiaromaticity can increase or decrease radical stability
Source: Royal Society of Chemistry journal article supplement (doi:10.1039/d4cp01031k), 2024-01-01
Supplement: d4cp01031k1.pdf [file d4cp01031k1.pdf]

## Supporting Information

### **The Spin Population Determines whether Antiaromaticity can Increase or Decrease Radical Stability**

Yanlin Song<sup>a</sup> and Jun Zhu<sup>b\*</sup>

<sup>a</sup>State Key Laboratory of Physical Chemistry of Solid Surfaces, Fujian Provincial Key Laboratory of Theoretical and Computational Chemistry, Department of Chemistry, College of Chemistry and Chemical Engineering, Xiamen University, Xiamen 361005, People's Republic of China.

<sup>b</sup>School of Science and Engineering, The Chinese University of Hong Kong, Shenzhen, 518172, People's Republic of China.

Correspondence and requests for materials should be addressed to Jun Zhu (email: jun.zhu@cuhk.edu.cn).

**Table S1.** NICS(1)<sub>zz</sub> (Unit: ppm) and RSE Values (M06-2X/def2-TZVP Level) of CAAC Framework Bonded 5MR Radicals (Unit: kcal/mol).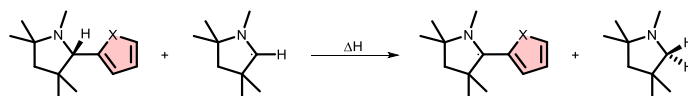

| X                                       | <b>BH (1)</b>               | <b>PH<sub>2</sub><sup>+</sup> (10)</b> | <b>AsH<sub>2</sub><sup>+</sup> (17)</b> | <b>SbH<sub>2</sub><sup>+</sup> (24)</b> | <b>AlH (8)</b>              | <b>GaH (15)</b>           | <b>InH (22)</b>             |
|-----------------------------------------|-----------------------------|----------------------------------------|-----------------------------------------|-----------------------------------------|-----------------------------|---------------------------|-----------------------------|
| NICS(1) <sub>zz</sub> (S <sub>0</sub> ) | 37.3                        | 1.3                                    | 2.1                                     | 3.8                                     | 14.0                        | 15.5                      | 11.8                        |
| NICS(1) <sub>zz</sub> (D <sub>0</sub> ) | 2.2                         | -1.5                                   | -1.9                                    | -0.2                                    | 1.8                         | 1.4                       | 0.8                         |
| RSE                                     | -39.6                       | -38.5                                  | -36.2                                   | -35.4                                   | -29.3                       | -29.1                     | -26.8                       |
| X                                       | <b>AlH<sub>2</sub> (9)</b>  | <b>NH<sub>2</sub><sup>+</sup> (3)</b>  | <b>SiH<sub>2</sub> (11)</b>             | <b>SnH<sub>2</sub> (25)</b>             | <b>GeH<sub>2</sub> (18)</b> | <b>SbH (27)</b>           | <b>InH<sub>2</sub> (23)</b> |
| NICS(1) <sub>zz</sub> (S <sub>0</sub> ) | 2.5                         | -10.1                                  | 1.6                                     | 3.0                                     | 1.6                         | -2.7                      | 2.6                         |
| NICS(1) <sub>zz</sub> (D <sub>0</sub> ) | 1.7                         | -4.9                                   | 1.6                                     | 1.4                                     | 1.3                         | -2.4                      | 1.8                         |
| RSE                                     | -26.0                       | -25.1                                  | -22.6                                   | -22.2                                   | -21.8                       | -19.4                     | -18.0                       |
| X                                       | <b>GaH<sub>2</sub> (16)</b> | <b>AsH (20)</b>                        | <b>PH (13)</b>                          | <b>CH<sub>2</sub> (4)</b>               | <b>SnH- (26)</b>            | <b>BH<sub>2</sub> (2)</b> | <b>GeH- (19)</b>            |
| NICS(1) <sub>zz</sub> (S <sub>0</sub> ) | 1.8                         | -7.2                                   | -12.9                                   | -10.3                                   | -2.8                        | -7.4                      | -11.1                       |
| NICS(1) <sub>zz</sub> (D <sub>0</sub> ) | 1.1                         | -4.5                                   | -7.2                                    | -5.5                                    | -2.4                        | -3.9                      | -6.9                        |
| RSE                                     | -17.7                       | -17.6                                  | -16.1                                   | -15.0                                   | -14.9                       | -14.2                     | -13.4                       |
| X                                       | <b>Te (28)</b>              | <b>SiH- (12)</b>                       | <b>Se (21)</b>                          | <b>O (7)</b>                            | <b>S (14)</b>               | <b>NH (6)</b>             | <b>CH- (5)</b>              |
| NICS(1) <sub>zz</sub> (S <sub>0</sub> ) | -19.2                       | -19.1                                  | -23.9                                   | -27.2                                   | -27.6                       | -31.4                     | -33.3                       |
| NICS(1) <sub>zz</sub> (D <sub>0</sub> ) | -25.0                       | -10.8                                  | -13.7                                   | -19.0                                   | -18.2                       | -25.2                     | -26.8                       |
| RSE                                     | -13.1                       | -12.0                                  | -11.1                                   | -10.7                                   | -9.2                        | -6.6                      | -4.7                        |

**Table S2.** Mülliken Spin Population and Spin Density (Isovalue: 0.01 a.u.) of Compounds **5<sub>rad</sub>** (X = CH<sup>-</sup>), **25<sub>rad</sub>** (X = SnH<sub>2</sub>) and **1<sub>rad</sub>** (X = BH) (without H atoms, Unit: e)

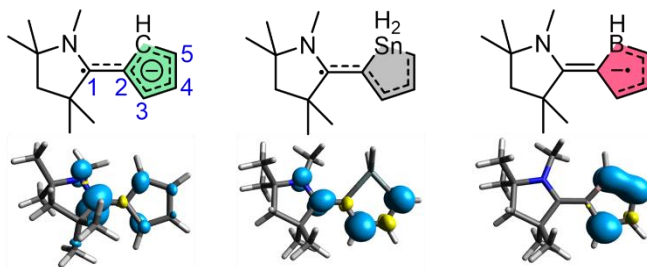

| X              | BH (1)                | PH <sub>2</sub> <sup>+</sup> (10) | AsH <sub>2</sub> <sup>+</sup> (17) | SbH <sub>2</sub> <sup>+</sup> (24) | AlH (8)               | GaH (15)            | InH (22)              |
|----------------|-----------------------|-----------------------------------|------------------------------------|------------------------------------|-----------------------|---------------------|-----------------------|
| C <sub>1</sub> | 0.03                  | 0.09                              | 0.10                               | 0.12                               | 0.15                  | 0.16                | 0.20                  |
| 5MR            | 0.95                  | 0.81                              | 0.78                               | 0.76                               | 0.78                  | 0.78                | 0.72                  |
| Other          | 0.02                  | 0.10                              | 0.12                               | 0.12                               | 0.07                  | 0.06                | 0.08                  |
| X              | AlH <sub>2</sub> (9)  | NH <sub>2</sub> <sup>+</sup> (3)  | SiH <sub>2</sub> (11)              | SnH <sub>2</sub> (25)              | GeH <sub>2</sub> (18) | SbH (27)            | InH <sub>2</sub> (23) |
| C <sub>1</sub> | 0.39                  | 0.25                              | 0.26                               | 0.26                               | 0.28                  | 0.34                | 0.39                  |
| 5MR            | 0.54                  | 0.57                              | 0.63                               | 0.61                               | 0.61                  | 0.55                | 0.54                  |
| Other          | 0.07                  | 0.18                              | 0.11                               | 0.13                               | 0.11                  | 0.11                | 0.07                  |
| X              | GaH <sub>2</sub> (16) | AsH (20)                          | PH (13)                            | CH <sub>2</sub> (4)                | SnH <sup>-</sup> (26) | BH <sub>2</sub> (2) | GeH <sup>-</sup> (19) |
| C <sub>1</sub> | 0.39                  | 0.34                              | 0.35                               | 0.42                               | 0.39                  | 0.51                | 0.40                  |
| 5MR            | 0.53                  | 0.54                              | 0.51                               | 0.47                               | 0.53                  | 0.43                | 0.51                  |
| Other          | 0.08                  | 0.12                              | 0.14                               | 0.11                               | 0.08                  | 0.06                | 0.09                  |
| X              | Te (28)               | SiH <sup>-</sup> (12)             | Se (21)                            | O (7)                              | S (14)                | NH (6)              | CH <sup>-</sup> (5)   |
| C <sub>1</sub> | 0.40                  | 0.46                              | 0.43                               | 0.58                               | 0.50                  | 0.69                | 0.75                  |
| 5MR            | 0.42                  | 0.47                              | 0.39                               | 0.27                               | 0.34                  | 0.18                | 0.21                  |
| Other          | 0.18                  | 0.07                              | 0.18                               | 0.15                               | 0.16                  | 0.13                | 0.04                  |

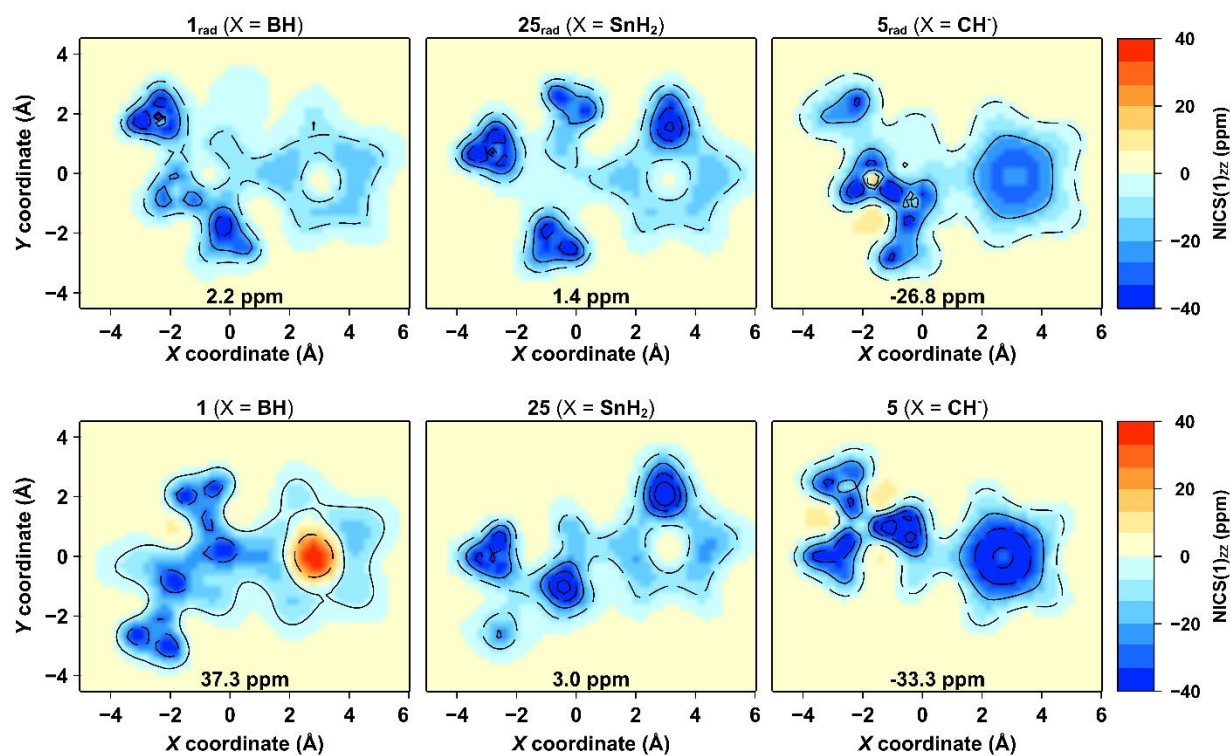

**Fig. S1.** NICS(1)<sub>zz</sub> grid plots of compounds **1** (X = BH), **25** (X = SnH<sub>2</sub>) and **5** (X = CH<sup>•</sup>) and their corresponding radicals **1<sub>rad</sub>** (X = BH), **25<sub>rad</sub>** (X = SnH<sub>2</sub>) and **5<sub>rad</sub>** (X = CH<sup>•</sup>), respectively. The numbers in each plot are the NICS(1)<sub>zz</sub> of 5MR with unit in ppm.

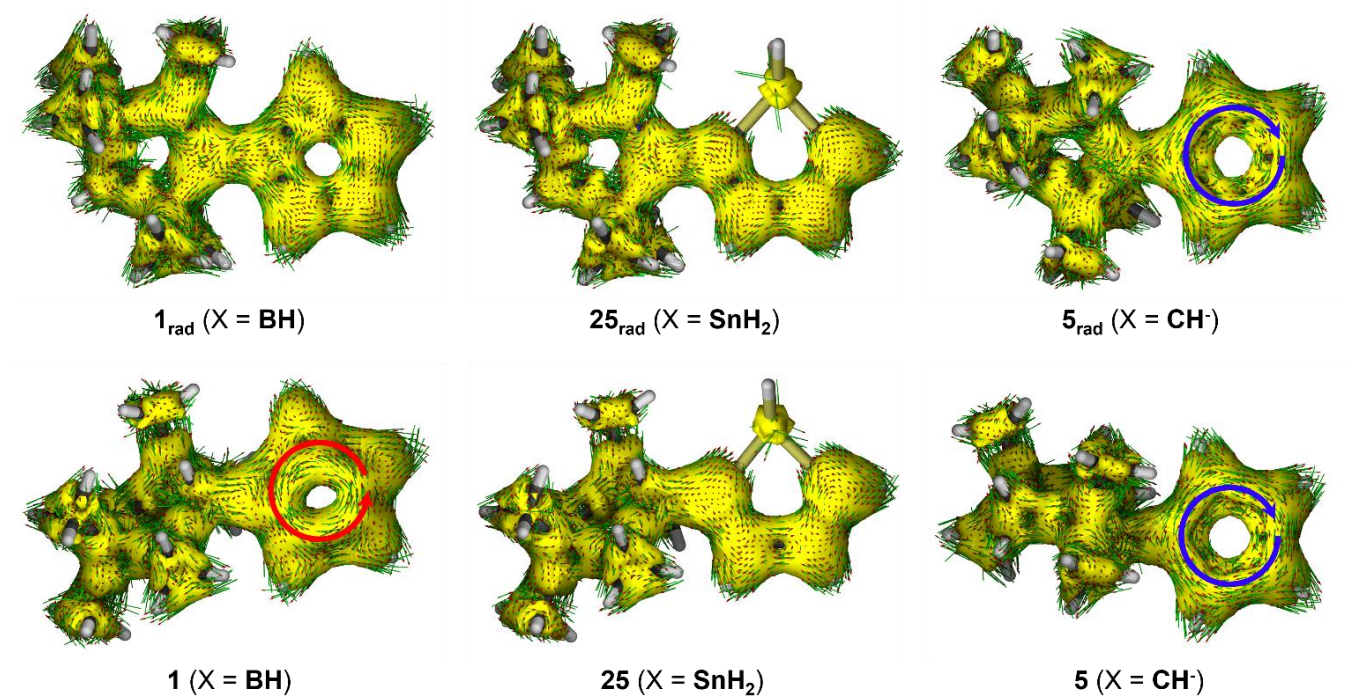

**Fig. S2.** AICD plots for compounds **1** ( $X = \text{BH}$ ), **25** ( $X = \text{SnH}_2$ ), **5** ( $X = \text{CH}\cdot$ ) and their corresponding radicals  $1_{\text{rad}}$  ( $X = \text{BH}$ ),  $25_{\text{rad}}$  ( $X = \text{SnH}_2$ ),  $5_{\text{rad}}$  ( $X = \text{CH}\cdot$ ) with isovalue = 0.03 a.u., respectively.

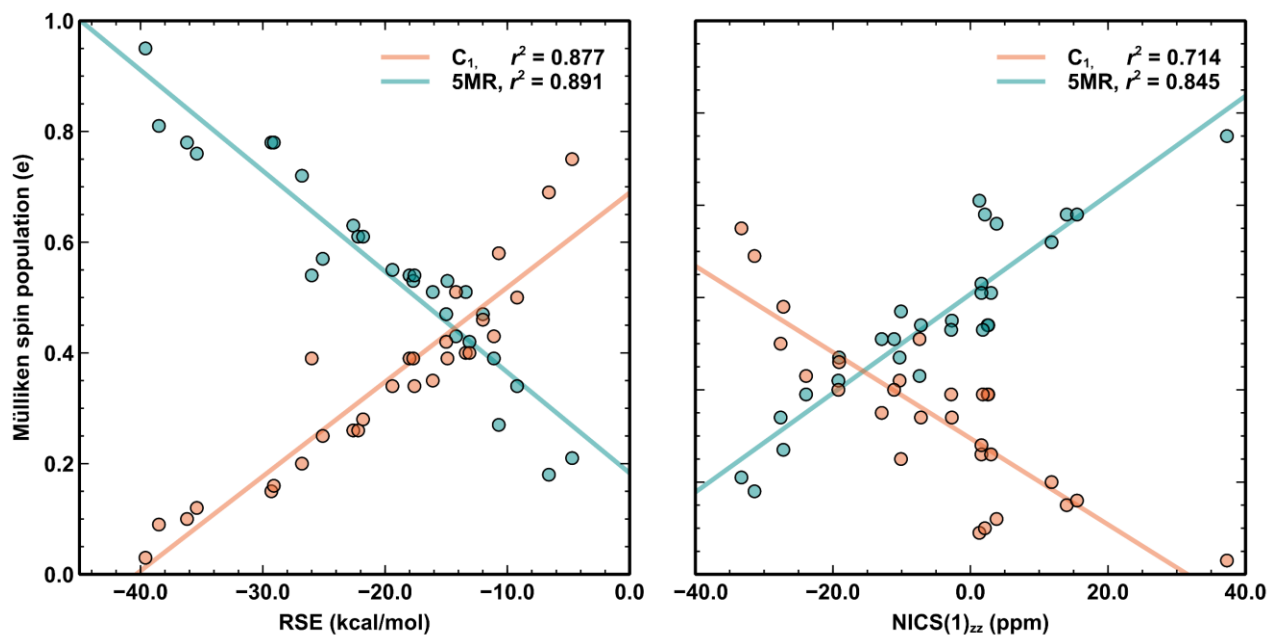

**Fig. S3.** Linear correlations between the Mulliken spin population and values of RSE (left) as well as NICS(1)<sub>zz</sub> (right) for the 28 compounds in D<sub>0</sub>, respectively.

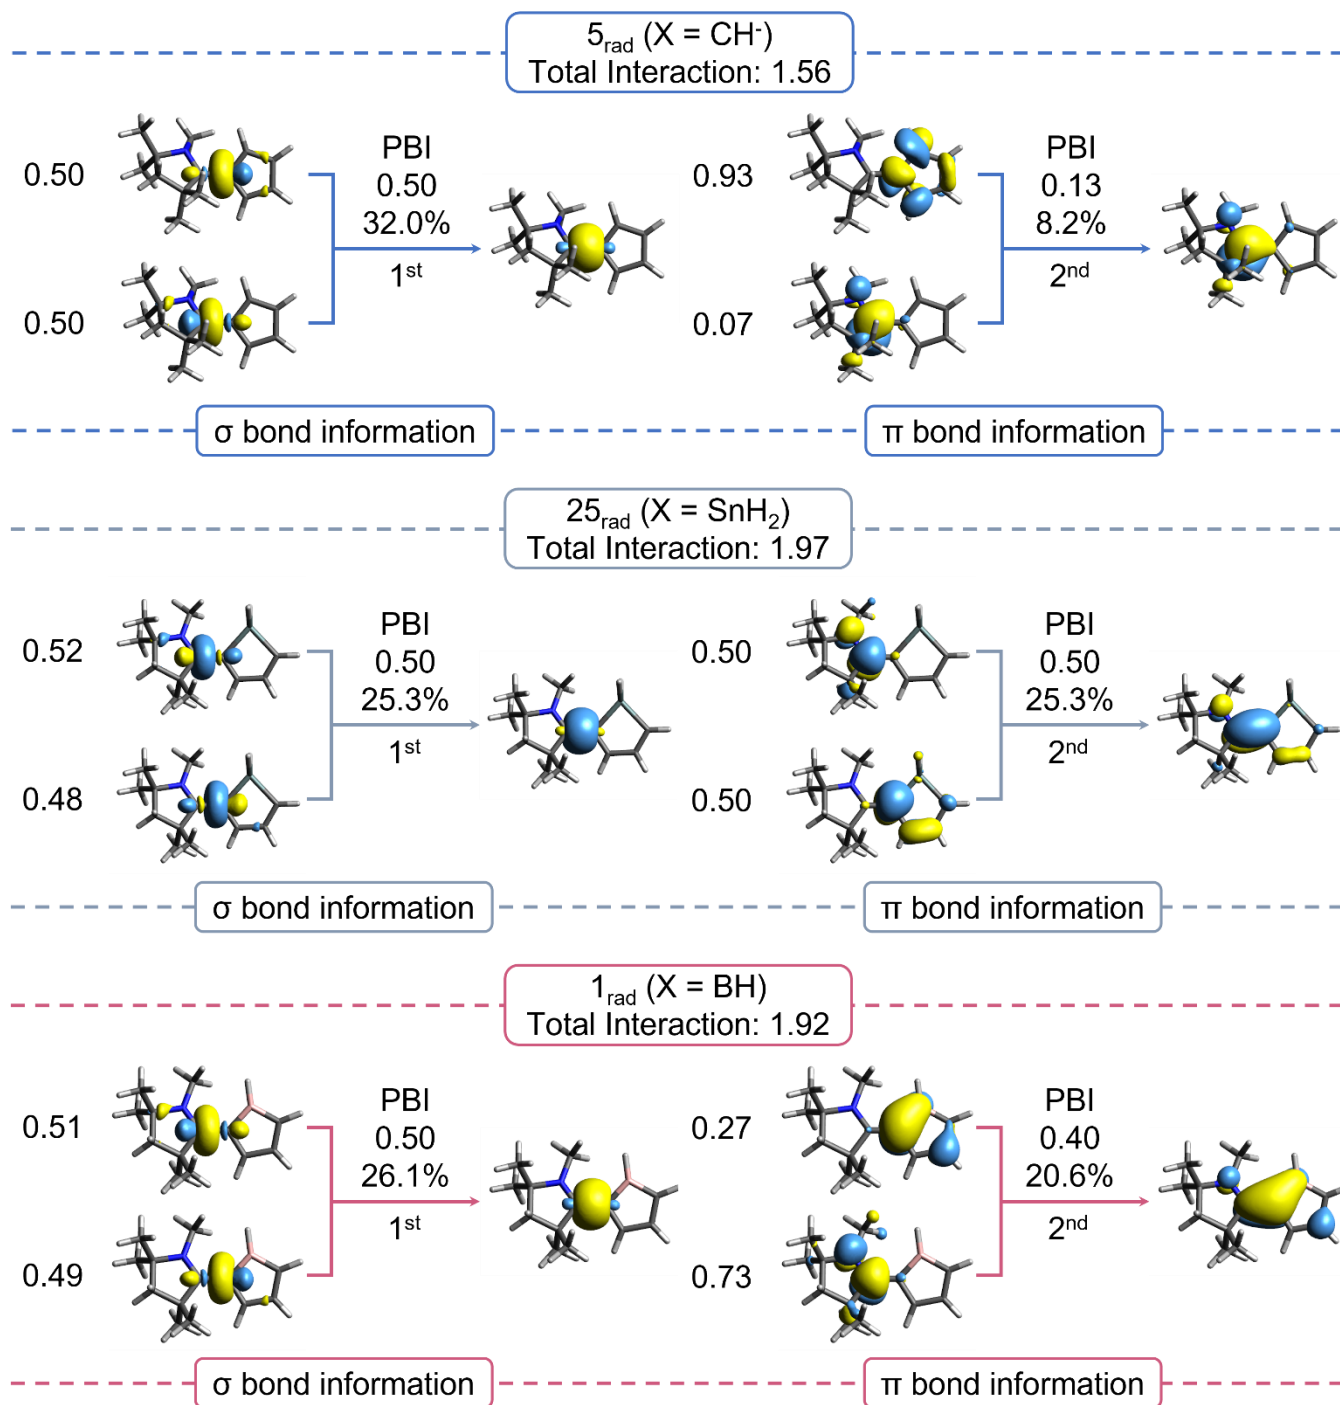

**Fig. S4.** PISO analysis for the  $\alpha$  spin orbitals of compounds **5<sub>rad</sub>** (X = CH<sup>-</sup>), **25<sub>rad</sub>** (X = SnH<sub>2</sub>) and **1<sub>rad</sub>** (X = BH), including the left two PISO pairs respect to  $\sigma$  and  $\pi$  bond information, populations (Pop), PBI, and its contribution (%) of each fragment (isovalue: 0.04 a.u.).

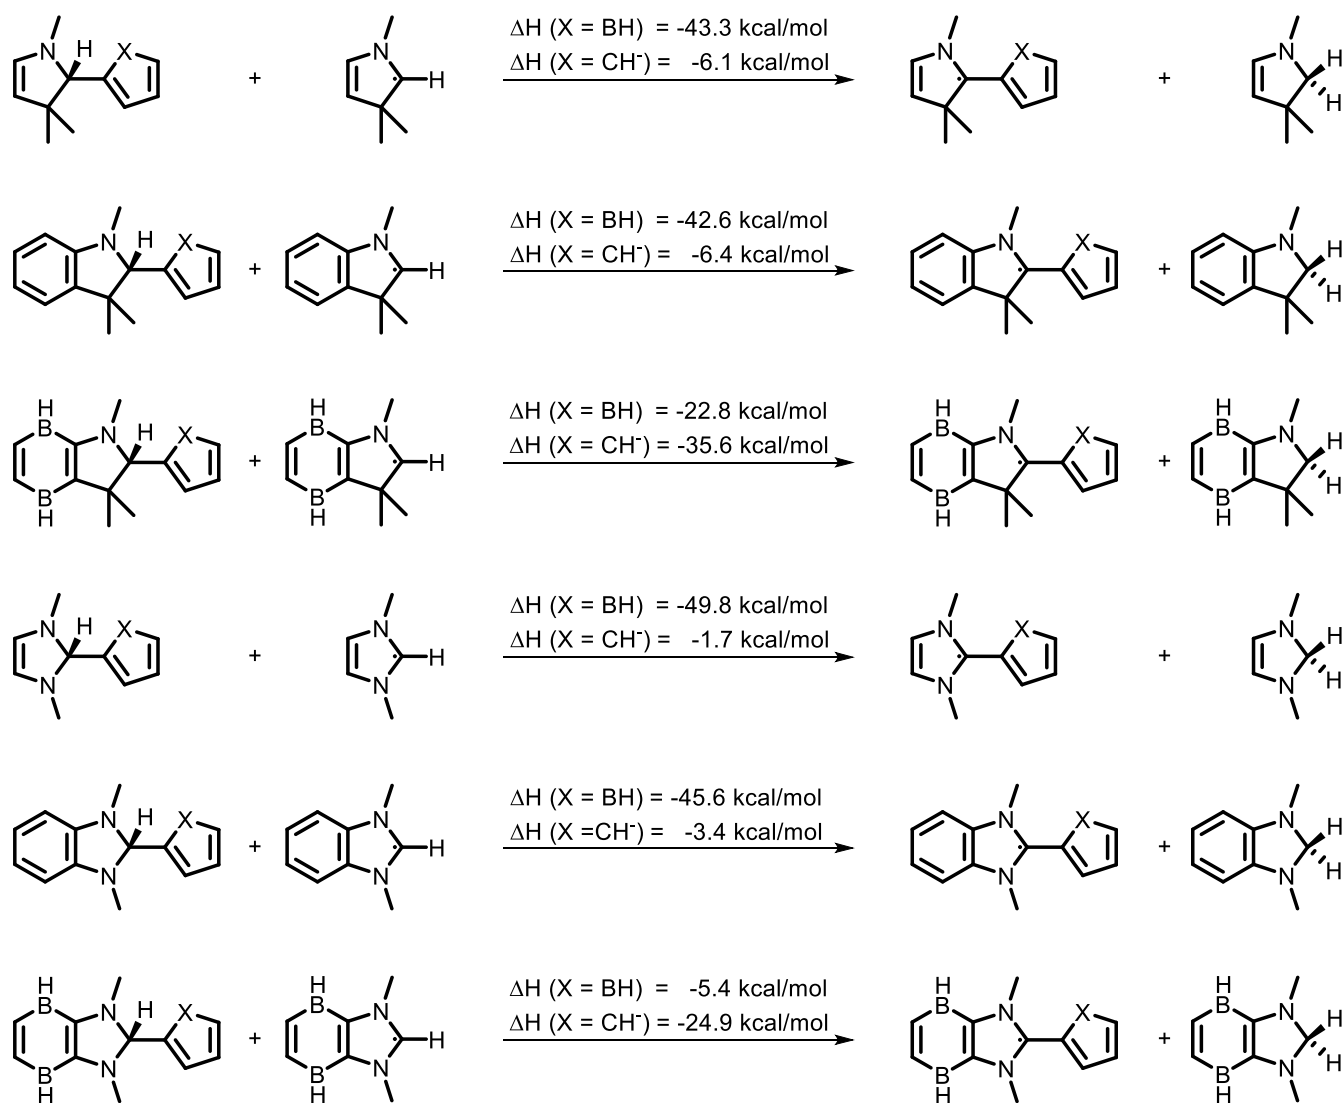

Fig. S5. The isodesmic equations in calculating RSEs for six compounds where X = CH<sup>·</sup> and BH, respectively.



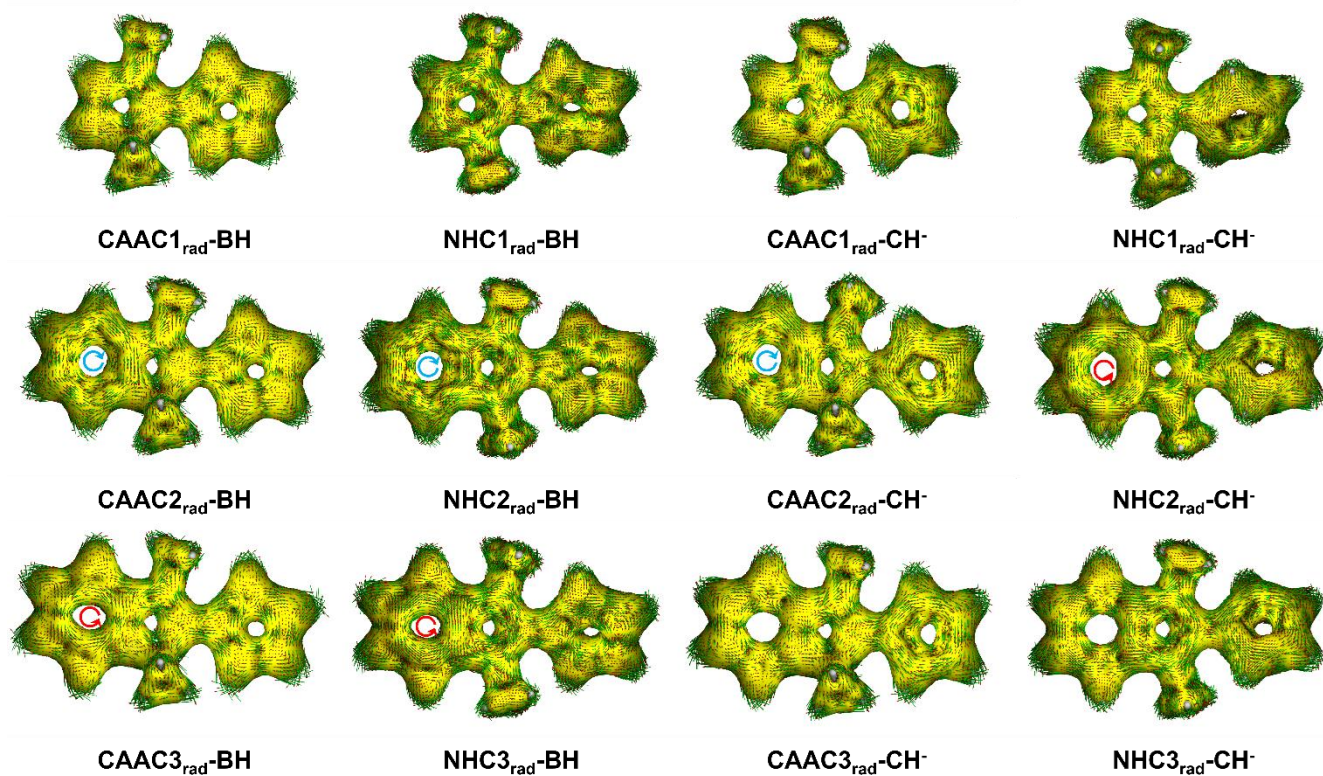

Fig. S6. The AICD plots for CAAC<sub>n</sub><sub>rad</sub>-CH<sup>-</sup> and NHC<sub>n</sub><sub>rad</sub>-CH<sup>-</sup> (n = 1 - 3) defined by 1,4-dihydro-1,4-diborinine (DHDB) plane.

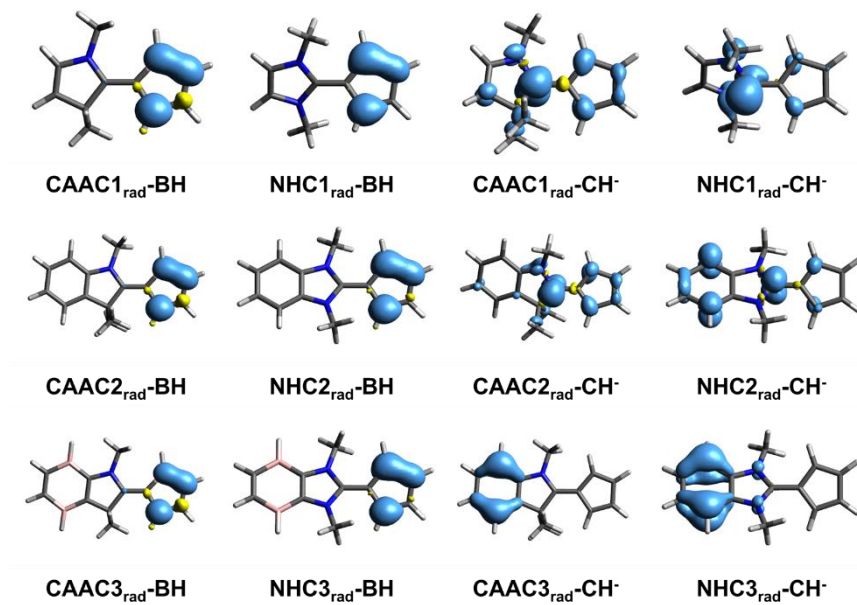

Fig. S7. The spin densities plots for CAAC<sub>n</sub><sub>rad</sub>-CH<sup>•</sup> and NHC<sub>n</sub><sub>rad</sub>-CH<sup>•</sup> (n = 1 - 3).

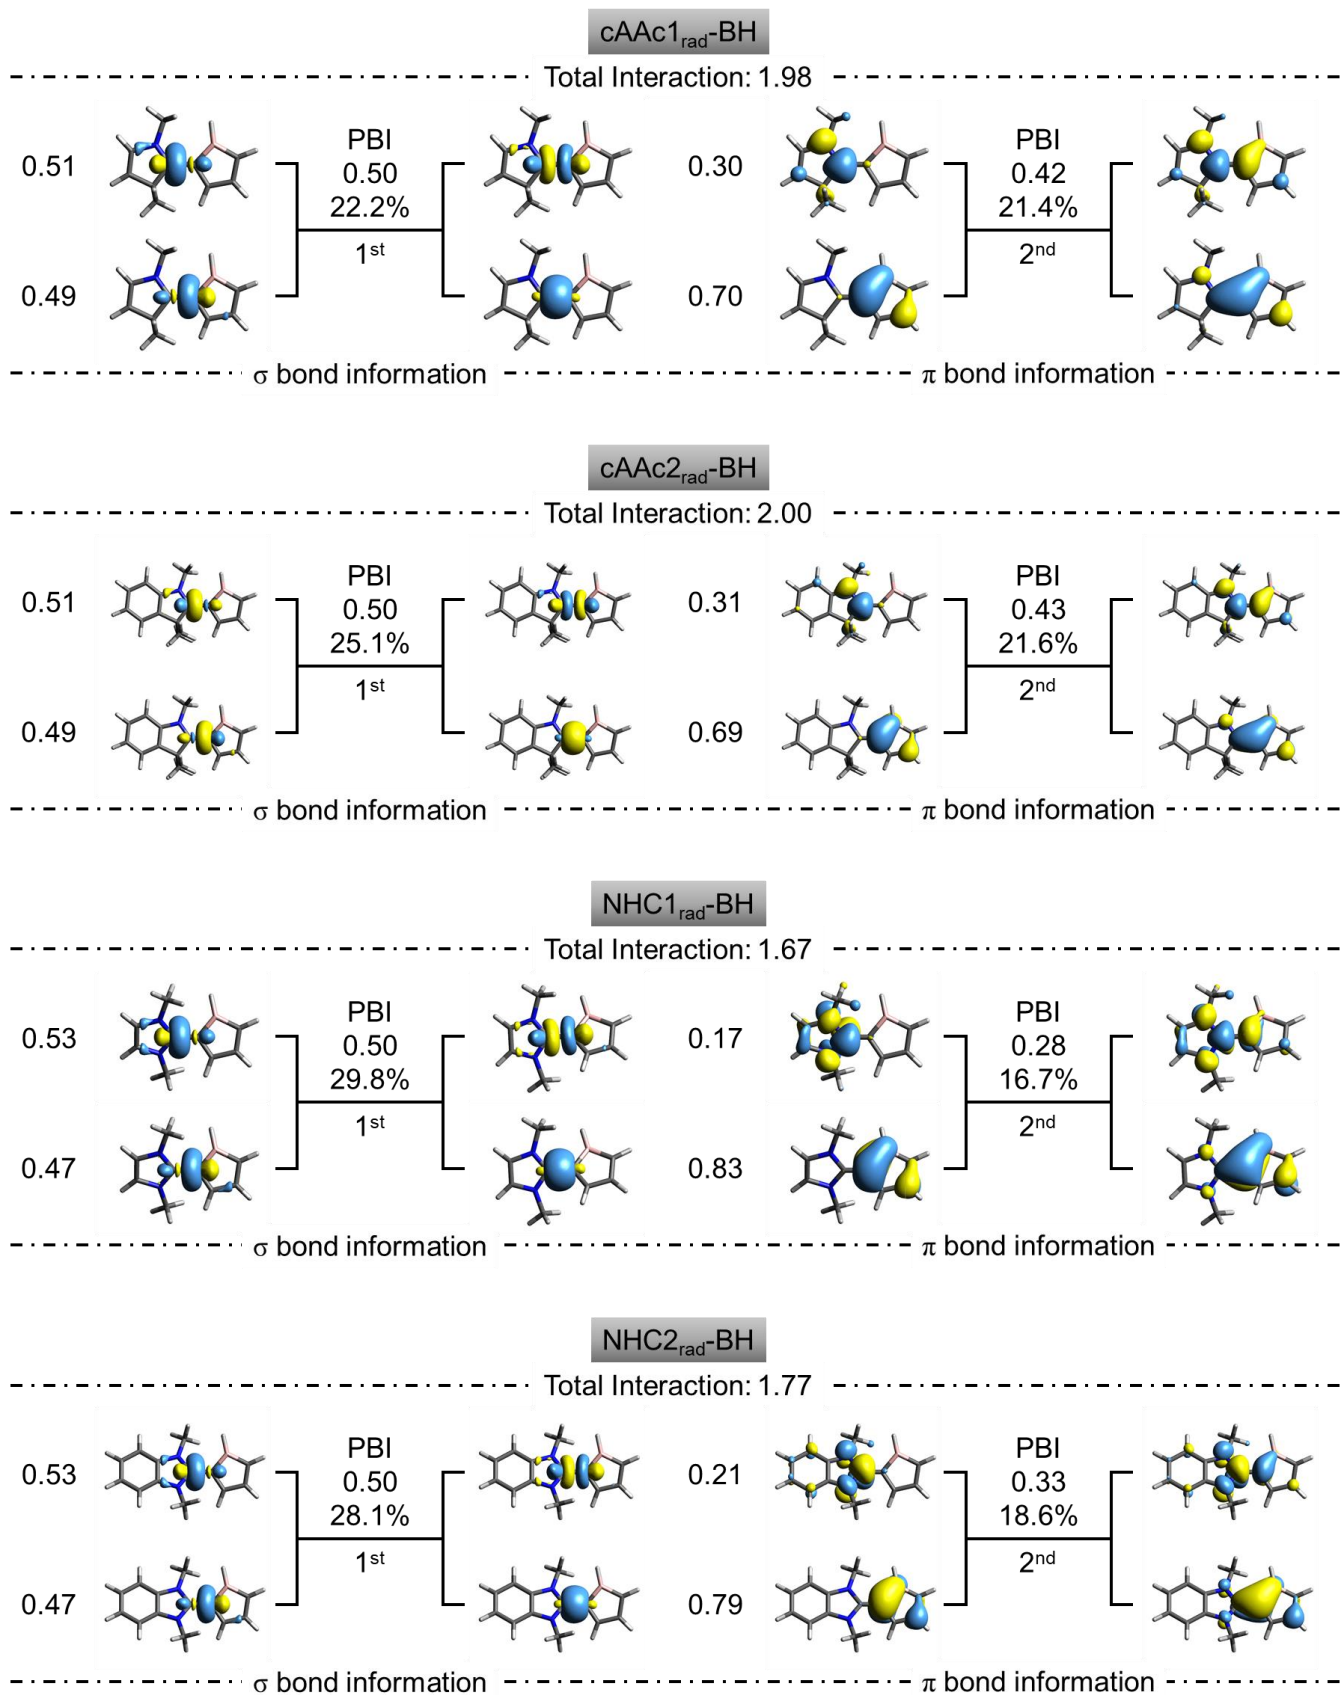

**Fig. S8.** The PISO analysis for **CAACn<sub>rad</sub>-BH** and **NHCn<sub>rad</sub>-BH** ( $n = 1 - 2$ ).

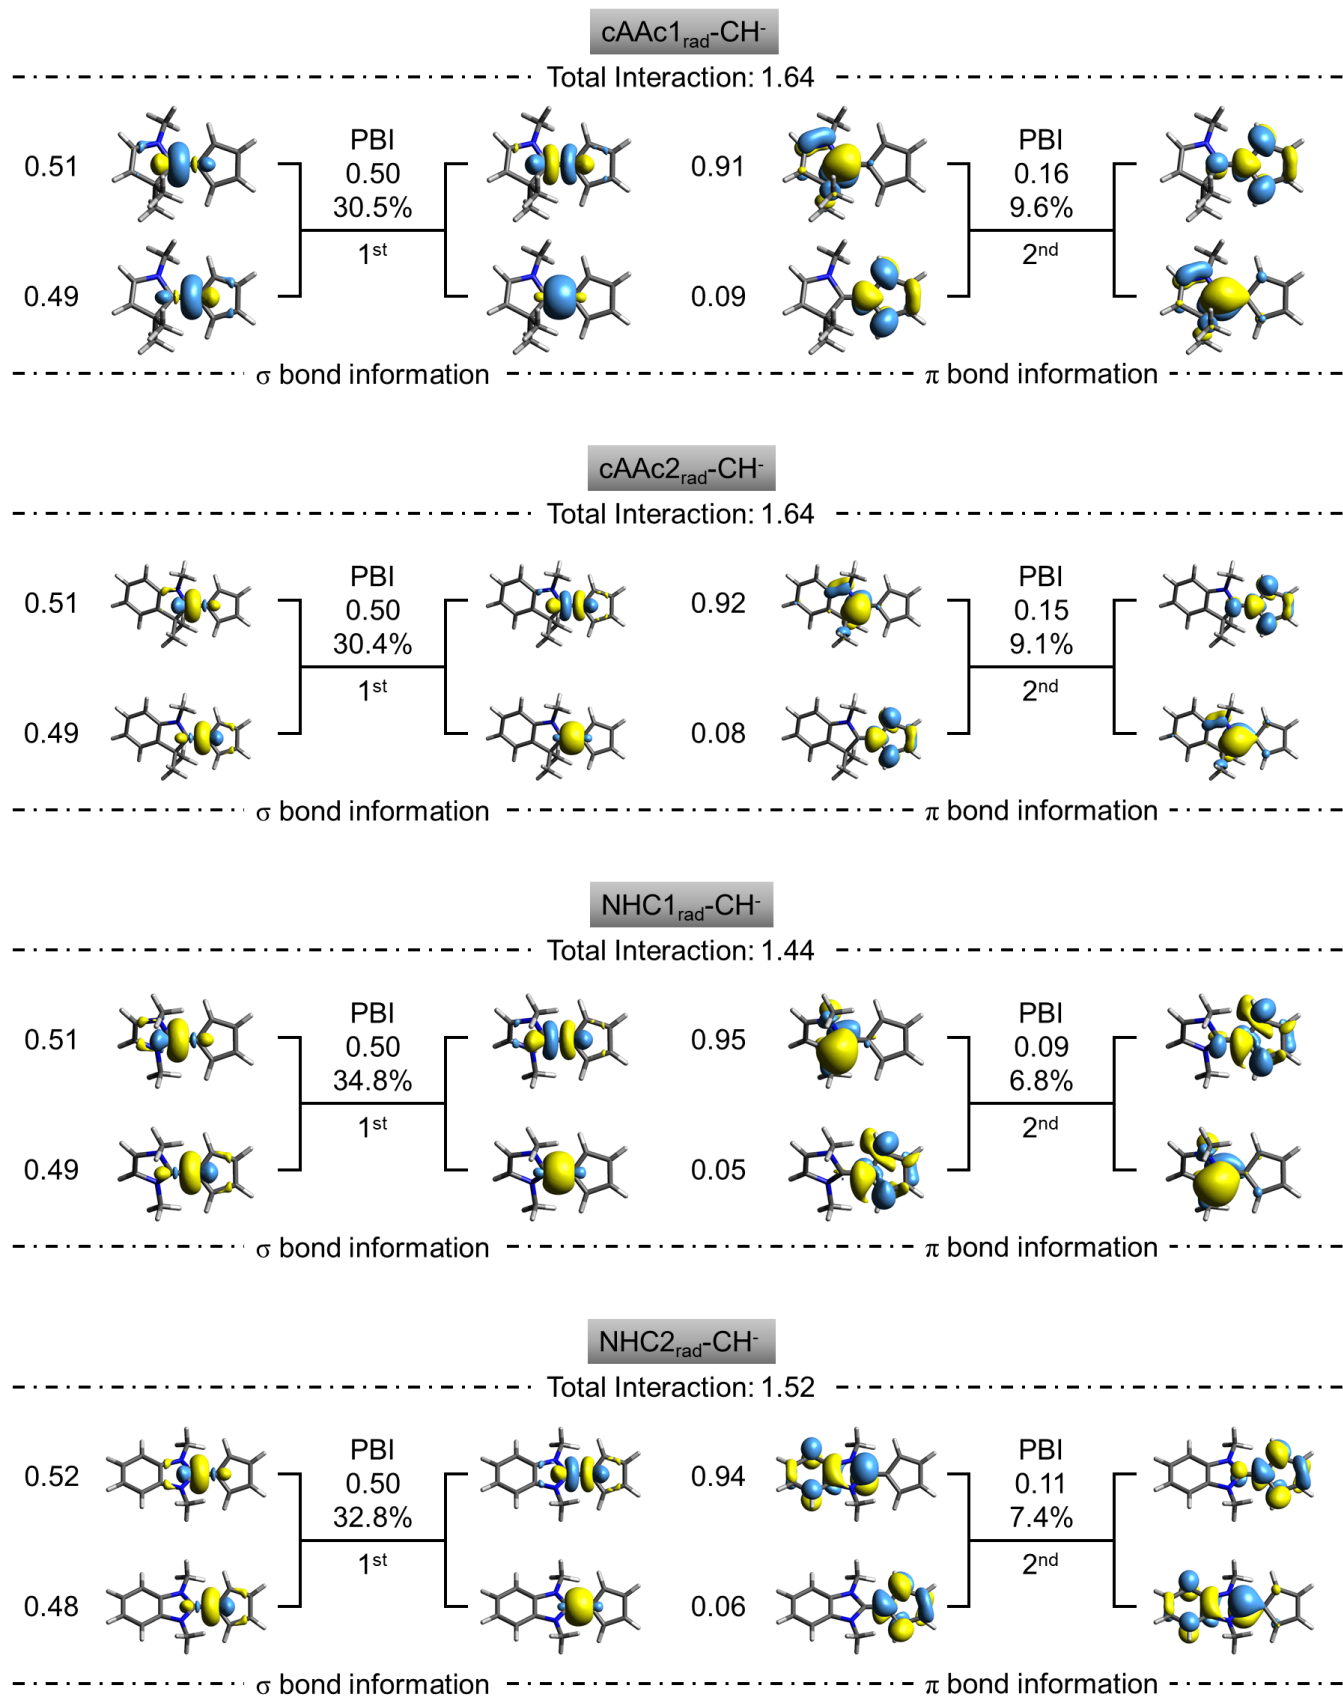

**Fig. S9.** The PISO analysis for **CAACn<sub>rad</sub>-CH<sup>-</sup>** and **NHCn<sub>rad</sub>-CH<sup>-</sup>** (n = 1 – 2).

## Cartesian coordinates of all species in this study

| Compounds in $S_0$      |             |             |             | -805.69256343 a.u.       |             |             |             |
|-------------------------|-------------|-------------|-------------|--------------------------|-------------|-------------|-------------|
| AlH <sub>2</sub> .anion |             |             |             | C                        | 1.41044600  | 0.52207400  | -0.62010300 |
| -806.34584361 a.u.      |             |             |             | Al                       | 2.80751300  | 1.89018000  | -0.60624800 |
| C                       | 0.61174600  | 0.31129100  | -0.11009000 | C                        | 4.27483700  | 0.62239200  | -0.63036300 |
| Al                      | 2.04226400  | 1.75222800  | -0.13019100 | C                        | 3.63083900  | -0.55460500 | -0.65431800 |
| C                       | 3.42932100  | 0.30258300  | -0.19416700 | C                        | 2.13090300  | -0.60873900 | -0.65260200 |
| C                       | 2.75966200  | -0.86251000 | -0.17688100 | H                        | 1.66137600  | -1.59099700 | -0.66348600 |
| C                       | 1.27382800  | -0.85733000 | -0.14913600 | H                        | 4.15090300  | -1.51048900 | -0.67450300 |
| H                       | 0.76148700  | -1.82306900 | -0.15514100 | H                        | 5.35617500  | 0.64329700  | -0.63075200 |
| H                       | 3.24875900  | -1.84012100 | -0.18366000 | H                        | 2.73707400  | 3.46337400  | -0.58825700 |
| H                       | 4.51645700  | 0.25225200  | -0.20876400 | C                        | -0.08478500 | 0.56008500  | -0.54525500 |
| H                       | 1.95079200  | 2.72583600  | -1.42822100 | C                        | -2.16253500 | -0.60246300 | -0.45320600 |
| H                       | 2.08882300  | 2.64322300  | 1.23313800  | N                        | -0.76296100 | -0.66576700 | -0.94258600 |
| C                       | -0.88685100 | 0.37165400  | -0.04492300 | C                        | -0.62101100 | 0.79785400  | 0.89140100  |
| C                       | -3.00808300 | -0.73733600 | 0.02465500  | C                        | -2.09918500 | 0.42925800  | 0.69898900  |
| N                       | -1.61272700 | -0.84421700 | -0.44185900 | H                        | -2.54340300 | 0.03979000  | 1.61707900  |
| C                       | -1.44516200 | 0.63649200  | 1.37775400  | H                        | -2.66105600 | 1.32400400  | 0.42001000  |
| C                       | -2.92721900 | 0.27361100  | 1.19339200  | H                        | -0.43940200 | 1.41032400  | -1.16183800 |
| H                       | -3.36444700 | -0.13238700 | 2.10956500  | C                        | -0.60651100 | -1.01710200 | -2.33684900 |
| H                       | -3.49142200 | 1.17448300  | 0.93719000  | H                        | -0.95473500 | -0.22986600 | -3.02307400 |
| H                       | -1.22512400 | 1.21693400  | -0.67860000 | H                        | 0.44238600  | -1.20709600 | -2.55740500 |
| C                       | -1.44785000 | -1.20219500 | -1.83086000 | H                        | -1.16406500 | -1.92919700 | -2.55470600 |
| H                       | -1.78030500 | -0.41201300 | -2.52415400 | C                        | -2.58292100 | -1.98745500 | 0.02996800  |
| H                       | -0.39567900 | -1.39091200 | -2.03242700 | H                        | -3.61683900 | -1.97799500 | 0.38177100  |
| H                       | -2.01120100 | -2.11175600 | -2.05614000 | H                        | -2.50901400 | -2.71563500 | -0.78057000 |
| C                       | -3.48721800 | -2.11316900 | 0.48602000  | H                        | -1.93788400 | -2.31764800 | 0.84419000  |
| H                       | -4.52367000 | -2.07183100 | 0.83259300  | C                        | -3.15590000 | -0.11143500 | -1.51359000 |
| H                       | -3.43102100 | -2.83408600 | -0.33342700 | H                        | -3.27968400 | -0.83239300 | -2.32303000 |
| H                       | -2.85569400 | -2.47188000 | 1.29918600  | H                        | -4.13184600 | 0.04340000  | -1.05032700 |
| C                       | -3.97615700 | -0.20025000 | -1.04072700 | H                        | -2.83506300 | 0.84017600  | -1.94334400 |
| H                       | -4.10954100 | -0.90597700 | -1.86322400 | C                        | -0.44688900 | 2.24173700  | 1.34150100  |
| H                       | -4.95360600 | -0.01893400 | -0.58784100 | H                        | -0.93675100 | 2.40413800  | 2.30427300  |
| H                       | -3.61380200 | 0.74456900  | -1.45177300 | H                        | 0.60920400  | 2.49448100  | 1.46865700  |
| C                       | -0.78641800 | -0.28406400 | 2.40417700  | H                        | -0.87817500 | 2.93826900  | 0.61938300  |
| H                       | 0.26120900  | -0.01524900 | 2.54207400  | C                        | 0.04057000  | -0.14255200 | 1.89785900  |
| H                       | -1.30365000 | -0.19987400 | 3.36472100  | H                        | 1.08488400  | 0.12460100  | 2.06569700  |
| H                       | -0.82164500 | -1.32307900 | 2.07126200  | H                        | -0.48307600 | -0.08629500 | 2.85458800  |
| C                       | -1.26653900 | 2.08755800  | 1.80344300  | H                        | 0.01317200  | -1.17387700 | 1.54445500  |
| H                       | -1.74105600 | 2.26133500  | 2.77436900  | AsH <sub>2</sub> .cation |             |             |             |
| H                       | -0.20795100 | 2.33979100  | 1.88510300  | -2799.50096976 a.u.      |             |             |             |
| H                       | -1.72223900 | 2.76495600  | 1.07636400  | C                        | 0.20082500  | -0.17644800 | -0.06655900 |
| AlH.neutral             |             |             |             | As                       | 1.21516500  | 1.39844300  | -0.47443500 |
|                         |             |             |             | C                        | 2.86463400  | 0.46409200  | -0.36977300 |

|                     |             |             |             |                        |             |             |             |
|---------------------|-------------|-------------|-------------|------------------------|-------------|-------------|-------------|
| C                   | 2.54476800  | -0.79816600 | -0.07358700 | N                      | -1.84016800 | -1.41620100 | -0.47580400 |
| C                   | 1.11311300  | -1.14458600 | 0.07316700  | C                      | -1.84178200 | 0.11126300  | 1.36946800  |
| H                   | 0.80369700  | -2.16112800 | 0.28673200  | C                      | -3.10296200 | -0.78500200 | 1.37458000  |
| H                   | 3.30103800  | -1.56311900 | 0.05605700  | H                      | -2.96881900 | -1.59885500 | 2.08953900  |
| H                   | 3.84705100  | 0.88486600  | -0.50748100 | H                      | -3.99670500 | -0.23150600 | 1.66927000  |
| H                   | 1.09386500  | 2.52735200  | 0.50339600  | H                      | -1.53722100 | 0.65823600  | -0.70713500 |
| H                   | 0.91699700  | 1.97855100  | -1.82469600 | C                      | -1.63932100 | -1.69681600 | -1.88365200 |
| C                   | -1.28930300 | -0.25280700 | 0.05650700  | H                      | -1.96351500 | -0.86844400 | -2.53168200 |
| C                   | -3.13662300 | -1.70073400 | 0.44786200  | H                      | -0.58303500 | -1.87621000 | -2.07798300 |
| N                   | -1.76060100 | -1.60326600 | -0.12599000 | H                      | -2.19111500 | -2.59295600 | -2.16678600 |
| C                   | -1.81303800 | 0.13834800  | 1.47057800  | C                      | -3.83161400 | -2.78393300 | 0.01482800  |
| C                   | -3.21424200 | -0.48816700 | 1.40353500  | H                      | -4.80504900 | -2.76769500 | 0.50893400  |
| H                   | -3.56736700 | -0.77347000 | 2.39504300  | H                      | -3.97836700 | -3.19560200 | -0.98520200 |
| H                   | -3.91809100 | 0.24636700  | 1.00640200  | H                      | -3.16574100 | -3.44440600 | 0.57080400  |
| H                   | -1.73431900 | 0.45061300  | -0.67543000 | C                      | -4.13858900 | -0.48684800 | -0.91154400 |
| C                   | -1.59470200 | -2.14465000 | -1.46131400 | H                      | -4.23561100 | -0.89332200 | -1.91944100 |
| H                   | -2.08705900 | -1.54107700 | -2.23592300 | H                      | -5.13856700 | -0.42867500 | -0.47915200 |
| H                   | -0.53727400 | -2.22095900 | -1.71460500 | H                      | -3.75057100 | 0.53017600  | -0.99043000 |
| H                   | -2.00861500 | -3.15122800 | -1.49848500 | C                      | -0.91809100 | -0.30584800 | 2.51211200  |
| C                   | -3.27441300 | -3.03352900 | 1.17392700  | H                      | -0.58878000 | -1.33854700 | 2.38822900  |
| H                   | -4.27984100 | -3.14301500 | 1.58306300  | H                      | -0.03281800 | 0.33031700  | 2.57202500  |
| H                   | -3.10080100 | -3.86511300 | 0.48858200  | H                      | -1.45646400 | -0.22794700 | 3.45932300  |
| H                   | -2.55677300 | -3.10804700 | 1.99064300  | C                      | -2.18443000 | 1.59208700  | 1.51400200  |
| C                   | -4.23281100 | -1.57609200 | -0.61383100 | H                      | -1.28938000 | 2.21097900  | 1.41029600  |
| H                   | -4.25571600 | -2.43597500 | -1.28356200 | H                      | -2.90715500 | 1.90888800  | 0.75939000  |
| H                   | -5.20289700 | -1.51529400 | -0.11935500 | H                      | -2.61436100 | 1.78966800  | 2.49819300  |
| H                   | -4.10913300 | -0.67072900 | -1.21272100 |                        |             |             |             |
| C                   | -0.98041400 | -0.50628800 | 2.57737300  | BH <sub>2</sub> .anion |             |             |             |
| H                   | 0.00746600  | -0.04794100 | 2.66312700  | -588.77445641 a.u.     |             |             |             |
| H                   | -1.48514100 | -0.37582600 | 3.53517100  | C                      | -1.56356700 | -0.18006500 | 0.24506500  |
| H                   | -0.84859600 | -1.57461000 | 2.40432000  | B                      | -2.82663100 | 0.32190500  | 1.13479200  |
| C                   | -1.87591800 | 1.64588000  | 1.67629800  | C                      | -4.02158100 | -0.33056400 | 0.26757700  |
| H                   | -0.87943200 | 2.08520200  | 1.77850700  | C                      | -3.49630300 | -0.99823100 | -0.77911500 |
| H                   | -2.40179100 | 2.14406700  | 0.85886700  | C                      | -2.02674800 | -0.91844800 | -0.78452100 |
| H                   | -2.40778300 | 1.87597800  | 2.60078400  | H                      | -1.40732300 | -1.41292100 | -1.53210600 |
|                     |             |             |             | H                      | -4.04993700 | -1.54400500 | -1.54175300 |
|                     |             |             |             | H                      | -5.09798800 | -0.28328400 | 0.42103900  |
|                     |             |             |             | H                      | -2.75561500 | -0.13310900 | 2.27525700  |
|                     |             |             |             | H                      | -2.92234100 | 1.54398000  | 1.22342700  |
|                     |             |             |             | C                      | -0.11067800 | 0.09167000  | 0.49379400  |
|                     |             |             |             | C                      | 2.18673400  | -0.33487400 | -0.01023300 |
|                     |             |             |             | N                      | 0.82609600  | -0.89684500 | -0.06204000 |
|                     |             |             |             | C                      | 0.42860100  | 1.41398900  | -0.11276400 |
|                     |             |             |             | C                      | 1.94742700  | 1.19479900  | -0.01078200 |
|                     |             |             |             | H                      | 2.48624000  | 1.68739000  | -0.82501500 |
|                     |             |             |             | H                      | 2.31496200  | 1.62314500  | 0.92578000  |
|                     |             |             |             | H                      | 0.03653600  | 0.16445800  | 1.59065700  |
|                     |             |             |             | C                      | 0.67499300  | -2.22536100 | 0.48179100  |
|                     |             |             |             | H                      | 0.80952400  | -2.26389700 | 1.57562600  |
|                     |             |             |             |                        |             |             |             |
| AsH.neutral         |             |             |             |                        |             |             |             |
| -2799.17361461 a.u. |             |             |             |                        |             |             |             |
| C                   | 0.27329700  | -0.21808700 | -0.07530300 |                        |             |             |             |
| As                  | 1.39257200  | 1.37736000  | -0.04434100 |                        |             |             |             |
| C                   | 2.90283200  | 0.17023300  | -0.13027900 |                        |             |             |             |
| C                   | 2.48755200  | -1.09974600 | -0.02468400 |                        |             |             |             |
| C                   | 1.04236000  | -1.31442400 | -0.00357300 |                        |             |             |             |
| H                   | 0.61422100  | -2.30938500 | 0.05883100  |                        |             |             |             |
| H                   | 3.17193300  | -1.93883900 | 0.03669800  |                        |             |             |             |
| H                   | 3.93785100  | 0.47798800  | -0.14164100 |                        |             |             |             |
| H                   | 1.28454700  | 1.68188600  | -1.53584000 |                        |             |             |             |
| C                   | -1.22385900 | -0.16931300 | -0.04345500 |                        |             |             |             |
| C                   | -3.24761100 | -1.37742600 | -0.03251000 |                        |             |             |             |

|   |             |             |             |
|---|-------------|-------------|-------------|
| H | -0.32786300 | -2.58600300 | 0.26207600  |
| H | 1.39900700  | -2.90576700 | 0.02493500  |
| C | 2.96826700  | -0.79314400 | -1.24107200 |
| H | 3.98495700  | -0.39000000 | -1.23198000 |
| H | 3.03568700  | -1.88348200 | -1.27131200 |
| H | 2.46217500  | -0.45750400 | -2.14669600 |
| C | 2.96730100  | -0.72673700 | 1.25408400  |
| H | 3.20534600  | -1.79246100 | 1.26975900  |
| H | 3.90573700  | -0.16868500 | 1.29476700  |
| H | 2.39229800  | -0.48851300 | 2.15160300  |
| C | 0.00171400  | 1.56328200  | -1.57178200 |
| H | -1.07672800 | 1.70803300  | -1.63926100 |
| H | 0.50818200  | 2.42279400  | -2.02221400 |
| H | 0.25038900  | 0.66558300  | -2.14062400 |
| C | -0.02205300 | 2.63425800  | 0.67769900  |
| H | 0.43379700  | 3.54327400  | 0.27197600  |
| H | -1.10714500 | 2.73064700  | 0.63756700  |
| H | 0.26595400  | 2.54528100  | 1.72836300  |

BH.neutral

-588.11135847 a.u.

|   |             |             |             |
|---|-------------|-------------|-------------|
| C | 0.85372200  | 0.39837700  | -0.12004700 |
| B | 1.82486300  | 1.65456600  | -0.01563600 |
| C | 3.27608900  | 1.05142400  | -0.02110800 |
| C | 3.11236300  | -0.27255100 | -0.11836600 |
| C | 1.65607300  | -0.66788800 | -0.17439200 |
| H | 1.32948600  | -1.70039600 | -0.22922100 |
| H | 3.90411300  | -1.01344300 | -0.15316900 |
| H | 4.24163900  | 1.53287600  | 0.03142000  |
| H | 1.50635100  | 2.79865000  | 0.05574300  |
| C | -0.64037700 | 0.39400900  | -0.08431400 |
| C | -2.62181400 | -0.88568800 | 0.05770300  |
| N | -1.23612900 | -0.88493200 | -0.44980800 |
| C | -1.23816900 | 0.73135100  | 1.32509900  |
| C | -2.43438200 | -0.24071500 | 1.43566600  |
| H | -2.20250900 | -1.02348800 | 2.16064700  |
| H | -3.34291700 | 0.26288500  | 1.77222900  |
| H | -0.98199700 | 1.18386700  | -0.77976400 |
| C | -1.09556900 | -1.19756700 | -1.85763700 |
| H | -1.49030000 | -0.40349600 | -2.50976300 |
| H | -0.04425900 | -1.33447500 | -2.10569400 |
| H | -1.61900500 | -2.12534800 | -2.08874700 |
| C | -3.14640600 | -2.31089900 | 0.18149300  |
| H | -4.09909900 | -2.31375200 | 0.71492500  |
| H | -3.31668300 | -2.76570000 | -0.79588300 |
| H | -2.43237100 | -2.92343500 | 0.73249000  |
| C | -3.58773600 | -0.06385900 | -0.80950200 |
| H | -3.73183600 | -0.52593300 | -1.78744100 |
| H | -4.56244900 | -0.00622600 | -0.32275200 |

|   |             |             |             |
|---|-------------|-------------|-------------|
| H | -3.23114400 | 0.95544100  | -0.96646300 |
| C | -0.25345700 | 0.46044600  | 2.46162000  |
| H | 0.58396500  | 1.16340900  | 2.45036100  |
| H | -0.76440300 | 0.56457000  | 3.42152500  |
| H | 0.15278200  | -0.54972600 | 2.39342700  |
| C | -1.67404200 | 2.19418000  | 1.38160200  |
| H | -2.07426400 | 2.43601500  | 2.36865600  |
| H | -0.82774600 | 2.85753400  | 1.18868700  |
| H | -2.44712900 | 2.40916600  | 0.64183400  |

CH<sub>2</sub>.neutral

-601.99672605 a.u.

|   |             |             |             |
|---|-------------|-------------|-------------|
| C | 0.82243000  | 0.50912200  | -0.11369900 |
| C | 1.62109600  | 1.75685100  | -0.37077600 |
| C | 3.03871200  | 1.27347300  | -0.36699100 |
| C | 3.04735000  | -0.05022100 | -0.15961700 |
| C | 1.66999900  | -0.52675000 | -0.00821300 |
| H | 1.37781200  | -1.55511900 | 0.15511900  |
| H | 3.92342700  | -0.68157500 | -0.11246000 |
| H | 3.89698500  | 1.91155400  | -0.51502700 |
| H | 1.44248300  | 2.53217500  | 0.38219300  |
| H | 1.34662300  | 2.20027500  | -1.33522200 |
| C | -0.66828500 | 0.50068600  | -0.00159300 |
| C | -2.68724000 | -0.75241000 | 0.01328700  |
| N | -1.27611900 | -0.74606800 | -0.44107700 |
| C | -1.22493700 | 0.65497900  | 1.43896800  |
| C | -2.68371700 | 0.22898900  | 1.21061200  |
| H | -3.11736100 | -0.22074900 | 2.10589500  |
| H | -3.28403100 | 1.10854300  | 0.96528800  |
| H | -1.05456400 | 1.35766200  | -0.59013100 |
| C | -1.06062400 | -1.07198200 | -1.83361800 |
| H | -1.41726100 | -0.29033400 | -2.52210900 |
| H | 0.00272200  | -1.21941700 | -2.01545500 |
| H | -1.57485700 | -2.00193500 | -2.07943400 |
| C | -3.07308700 | -2.16962400 | 0.42635500  |
| H | -4.11345900 | -2.20582100 | 0.75643600  |
| H | -2.96193100 | -2.86014400 | -0.41225800 |
| H | -2.43471200 | -2.51490600 | 1.23957000  |
| C | -3.66670400 | -0.24818200 | -1.05352600 |
| H | -3.74256300 | -0.93812900 | -1.89534100 |
| H | -4.66032800 | -0.14376100 | -0.61437100 |
| H | -3.36480600 | 0.73022400  | -1.43425800 |
| C | -0.53330100 | -0.29561100 | 2.41430800  |
| H | 0.50373200  | -0.00307800 | 2.58289100  |
| H | -1.05411800 | -0.27889500 | 3.37412500  |
| H | -0.53825300 | -1.31731400 | 2.03352700  |
| C | -1.12233800 | 2.08338200  | 1.95569400  |
| H | -1.65639500 | 2.18298300  | 2.90335000  |
| H | -0.08224600 | 2.36286100  | 2.13525600  |

|                    |             |             |             |
|--------------------|-------------|-------------|-------------|
| H                  | -1.55453100 | 2.79442200  | 1.24789000  |
| CH.anion           |             |             |             |
| -601.43336715 a.u. |             |             |             |
| C                  | 0.88414500  | 0.31792500  | 0.32886900  |
| C                  | 1.68362400  | 1.36934200  | 0.82186800  |
| C                  | 3.03300800  | 1.00112900  | 0.68601600  |
| C                  | 3.07214400  | -0.27690700 | 0.09736500  |
| C                  | 1.75018100  | -0.70088600 | -0.12199100 |
| H                  | 1.44061700  | -1.63499100 | -0.57388500 |
| H                  | 3.96579000  | -0.83598600 | -0.15066500 |
| H                  | 3.88906700  | 1.59798500  | 0.97351100  |
| H                  | 1.30544800  | 2.30153600  | 1.22660200  |
| C                  | -0.60660600 | 0.32459200  | 0.31436700  |
| C                  | -2.66197800 | -0.31185800 | -0.70609600 |
| N                  | -1.21329700 | -0.18881900 | -0.92227400 |
| C                  | -1.34761600 | -0.51642800 | 1.38460100  |
| C                  | -2.78173900 | -0.49769600 | 0.83116400  |
| H                  | -3.33551100 | -1.40634200 | 1.08423600  |
| H                  | -3.33028400 | 0.34606800  | 1.25965200  |
| H                  | -0.92756500 | 1.37587800  | 0.47675500  |
| C                  | -0.78957000 | 0.49838800  | -2.11696500 |
| H                  | -1.02798000 | 1.57565300  | -2.10707200 |
| H                  | 0.29230600  | 0.39963300  | -2.20183900 |
| H                  | -1.25869600 | 0.05187100  | -2.99827200 |
| C                  | -3.19021200 | -1.52566000 | -1.46990500 |
| H                  | -4.26751200 | -1.64301700 | -1.32109800 |
| H                  | -3.00513500 | -1.41769000 | -2.54145600 |
| H                  | -2.68491200 | -2.42846800 | -1.12568500 |
| C                  | -3.45288400 | 0.93334200  | -1.13610900 |
| H                  | -3.43539500 | 1.06599100  | -2.22018100 |
| H                  | -4.49501600 | 0.83832500  | -0.82123300 |
| H                  | -3.03868600 | 1.83181200  | -0.67331100 |
| C                  | -0.80911200 | -1.94367000 | 1.44611900  |
| H                  | 0.22763600  | -1.94194600 | 1.78378700  |
| H                  | -1.41462800 | -2.54275400 | 2.13423900  |
| H                  | -0.83338100 | -2.40690900 | 0.45855700  |
| C                  | -1.23376200 | 0.12851800  | 2.75754100  |
| H                  | -1.77023700 | -0.45297700 | 3.51366400  |
| H                  | -0.18092600 | 0.19368800  | 3.04202100  |
| H                  | -1.64330900 | 1.14234800  | 2.74891300  |

|                         |            |             |             |
|-------------------------|------------|-------------|-------------|
| GaH <sub>2</sub> .anion |            |             |             |
| -2488.76464073 a.u.     |            |             |             |
| C                       | 0.21390800 | -0.05915700 | -0.07805800 |
| Ga                      | 1.64002700 | 1.44552300  | -0.09290700 |
| C                       | 3.03276600 | -0.05296800 | -0.16894700 |
| C                       | 2.36786400 | -1.21875500 | -0.16045900 |
| C                       | 0.88345400 | -1.22110800 | -0.13037600 |

|   |             |             |             |
|---|-------------|-------------|-------------|
| H | 0.37480900  | -2.18810900 | -0.14605300 |
| H | 2.86389900  | -2.19213000 | -0.17659600 |
| H | 4.12025600  | -0.08795400 | -0.18401400 |
| H | 1.53858500  | 2.41591700  | -1.39979600 |
| H | 1.69052900  | 2.33225000  | 1.28063000  |
| C | -1.28402500 | -0.00006800 | -0.01268900 |
| C | -3.40392600 | -1.11302900 | 0.03759800  |
| N | -2.00744400 | -1.21188900 | -0.42721100 |
| C | -1.84514100 | 0.24331900  | 1.41296500  |
| C | -3.32658400 | -0.11748000 | 1.21971400  |
| H | -3.76632200 | -0.53525600 | 2.12939400  |
| H | -3.89015800 | 0.78661000  | 0.97361400  |
| H | -1.62239700 | 0.85332700  | -0.63516300 |
| C | -1.83808500 | -1.55174200 | -1.82029400 |
| H | -2.17004600 | -0.75337200 | -2.50439800 |
| H | -0.78490300 | -1.73562100 | -2.02077000 |
| H | -2.39903600 | -2.45937400 | -2.05889700 |
| C | -4.37027100 | -0.56334700 | -1.02269800 |
| H | -4.49994200 | -1.25803400 | -1.85510100 |
| H | -5.34935600 | -0.39029300 | -0.57005900 |
| H | -4.00893100 | 0.38775900  | -1.41988700 |
| C | -3.88226100 | -2.49535000 | 0.48000100  |
| H | -4.91930000 | -2.45973400 | 0.82545800  |
| H | -3.82406000 | -3.20543000 | -0.34870400 |
| H | -3.25172700 | -2.86408000 | 1.28942200  |
| C | -1.18769900 | -0.69278700 | 2.42596400  |
| H | -1.22203600 | -1.72630200 | 2.07650600  |
| H | -0.14016600 | -0.42621300 | 2.56872000  |
| H | -1.70603200 | -0.62388200 | 3.38714700  |
| C | -1.67046600 | 1.68758100  | 1.86244600  |
| H | -0.61319600 | 1.93887500  | 1.95871600  |
| H | -2.11798800 | 2.37630200  | 1.14099500  |
| H | -2.15537800 | 1.84644300  | 2.83081000  |

|                     |             |             |             |
|---------------------|-------------|-------------|-------------|
| GaH.neutral         |             |             |             |
| -2488.11538095 a.u. |             |             |             |
| C                   | 0.18168200  | -0.00937200 | -0.12535200 |
| Ga                  | 1.53383500  | 1.46759200  | -0.13351700 |
| C                   | 3.03168300  | 0.16664900  | -0.14139100 |
| C                   | 2.42429700  | -1.02595600 | -0.14781300 |
| C                   | 0.92720300  | -1.12014100 | -0.14239800 |
| H                   | 0.47967200  | -2.11184300 | -0.13704900 |
| H                   | 2.97515200  | -1.96390000 | -0.15552300 |
| H                   | 4.11054400  | 0.23803600  | -0.14380700 |
| H                   | 1.42143000  | 3.03910900  | -0.13844100 |
| C                   | -1.31268600 | 0.01363500  | -0.04706000 |
| C                   | -3.37395400 | -1.17624600 | 0.06946100  |
| N                   | -1.97432400 | -1.22852400 | -0.42113300 |
| C                   | -1.85012400 | 0.26922700  | 1.38642800  |



|   |             |             |             |
|---|-------------|-------------|-------------|
| C | -3.32322300 | -0.12313100 | 1.20252300  |
| H | -3.76088000 | -0.50178200 | 2.12826700  |
| H | -3.89766100 | 0.75865800  | 0.90811600  |
| H | -1.67858200 | 0.84798400  | -0.67864900 |
| C | -1.81411400 | -1.60360400 | -1.80891000 |
| H | -2.17457400 | -0.83455500 | -2.50927200 |
| H | -0.76280400 | -1.78203600 | -2.02695700 |
| H | -2.35843700 | -2.52767300 | -2.00898500 |
| C | -3.77400100 | -2.55813900 | 0.57830300  |
| H | -4.80734800 | -2.55691400 | 0.93194600  |
| H | -3.69130700 | -3.29946400 | -0.21939800 |
| H | -3.12304800 | -2.86488600 | 1.39696900  |
| C | -4.37549200 | -0.71877900 | -0.99797400 |
| H | -4.48919000 | -1.45564600 | -1.79441900 |
| H | -5.35322200 | -0.57035400 | -0.53633800 |
| H | -4.06921900 | 0.22981500  | -1.44466000 |
| C | -1.69812500 | 1.72277500  | 1.81341400  |
| H | -0.64701500 | 1.99011000  | 1.95022300  |
| H | -2.12875100 | 2.40173900  | 1.07423000  |
| H | -2.20238600 | 1.89514100  | 2.76700400  |
| C | -1.17330000 | -0.64434300 | 2.40728700  |
| H | -1.18725900 | -1.68175400 | 2.07150300  |
| H | -0.13232300 | -0.35990500 | 2.56689800  |
| H | -1.69541600 | -0.57872300 | 3.36429100  |

GeH<sub>2</sub>.neutral

-2640.88699230 a.u.

|    |             |             |             |
|----|-------------|-------------|-------------|
| C  | 0.21587500  | -0.16359000 | -0.07193100 |
| Ge | 1.47166200  | 1.35016000  | -0.14442300 |
| C  | 2.96876700  | 0.09670800  | -0.14079100 |
| C  | 2.44134400  | -1.13221100 | -0.09743200 |
| C  | 0.96579000  | -1.27249500 | -0.06805500 |
| H  | 0.51879700  | -2.26200000 | -0.03659100 |
| H  | 3.05007800  | -2.03125500 | -0.08238700 |
| H  | 4.03453100  | 0.27228900  | -0.15939100 |
| H  | 1.41920500  | 2.28619000  | 1.08716300  |
| H  | 1.33593400  | 2.20627100  | -1.42495200 |
| C  | -1.28030500 | -0.12327600 | -0.00849800 |
| C  | -3.31655500 | -1.30610400 | 0.10914800  |
| N  | -1.92333200 | -1.37882900 | -0.37515900 |
| C  | -1.84934300 | 0.21361700  | 1.41099400  |
| C  | -3.12653800 | -0.65579600 | 1.48535900  |
| H  | -2.99097300 | -1.43941900 | 2.23301800  |
| H  | -4.00282600 | -0.07267500 | 1.77557500  |
| H  | -1.61292700 | 0.67963400  | -0.69224800 |
| C  | -1.77700000 | -1.70678200 | -1.77959900 |
| H  | -2.11107400 | -0.89356500 | -2.44167600 |
| H  | -0.73213000 | -1.90981800 | -2.00789700 |
| H  | -2.35284900 | -2.60167400 | -2.01511100 |

|   |             |             |             |
|---|-------------|-------------|-------------|
| C | -3.91256000 | -2.70292300 | 0.23311700  |
| H | -4.87225700 | -2.65540400 | 0.75160300  |
| H | -4.08983700 | -3.15590600 | -0.74386100 |
| H | -3.23796100 | -3.34566600 | 0.79923700  |
| C | -4.22636300 | -0.44291800 | -0.77832800 |
| H | -4.35924100 | -0.88861900 | -1.76529800 |
| H | -5.21155000 | -0.35661600 | -0.31760300 |
| H | -3.83134500 | 0.56595000  | -0.91064700 |
| C | -0.89829200 | -0.18890300 | 2.53685800  |
| H | -0.58811800 | -1.22926200 | 2.42752100  |
| H | -0.00135700 | 0.43314300  | 2.55541200  |
| H | -1.40662500 | -0.07994500 | 3.49758700  |
| C | -2.15536600 | 1.70543300  | 1.51641500  |
| H | -1.25239800 | 2.30076900  | 1.35524200  |
| H | -2.90026700 | 2.01177200  | 0.77930500  |
| H | -2.53995000 | 1.94959500  | 2.50891600  |

GeH.anion

-2640.32098398 a.u.

|    |             |             |             |
|----|-------------|-------------|-------------|
| C  | 0.25523500  | -0.10108200 | 0.05596400  |
| Ge | 1.52475900  | 1.45337200  | -0.06463200 |
| C  | 2.94977200  | 0.06067000  | -0.01515500 |
| C  | 2.39999800  | -1.16361100 | -0.18181200 |
| C  | 0.94399400  | -1.24793500 | -0.14834100 |
| H  | 0.44969500  | -2.20840500 | -0.30160900 |
| H  | 2.98102500  | -2.06929800 | -0.35847800 |
| H  | 4.02859400  | 0.18383500  | -0.05594000 |
| H  | 1.55066200  | 1.98544000  | 1.44851000  |
| C  | -1.24122500 | -0.05129900 | 0.14550100  |
| C  | -3.35973100 | -1.13708700 | -0.05610500 |
| N  | -1.95977800 | -1.15008600 | -0.51664300 |
| C  | -1.80219500 | -0.12339300 | 1.58932700  |
| C  | -3.28453000 | -0.42974800 | 1.31981100  |
| H  | -3.72477300 | -1.04132900 | 2.11203400  |
| H  | -3.84918200 | 0.50576600  | 1.28163500  |
| H  | -1.57995800 | 0.91446300  | -0.27849200 |
| C  | -1.76904600 | -1.19850400 | -1.94696700 |
| H  | -2.08274700 | -0.27317600 | -2.45731900 |
| H  | -0.71232100 | -1.34770100 | -2.16047700 |
| H  | -2.33123200 | -2.03278700 | -2.37490500 |
| C  | -3.86219200 | -2.57518400 | 0.06475500  |
| H  | -4.90151300 | -2.59967400 | 0.40418500  |
| H  | -3.80794500 | -3.08450900 | -0.90060000 |
| H  | -3.24433200 | -3.12470200 | 0.77548300  |
| C  | -4.30375200 | -0.35118300 | -0.97914900 |
| H  | -4.42937200 | -0.84353800 | -1.94572500 |
| H  | -5.28732800 | -0.26598100 | -0.51134500 |
| H  | -3.92319100 | 0.65769100  | -1.15313900 |
| C  | -1.14988800 | -1.25674600 | 2.37877000  |

|   |             |             |            |
|---|-------------|-------------|------------|
| H | -0.09640600 | -1.03906000 | 2.55692100 |
| H | -1.65776500 | -1.37982600 | 3.34026200 |
| H | -1.20570900 | -2.19591100 | 1.82532600 |
| C | -1.61381800 | 1.19095700  | 2.33395100 |
| H | -0.55084800 | 1.41206900  | 2.44685700 |
| H | -2.07467300 | 2.01829500  | 1.78796000 |
| H | -2.07018000 | 1.13977000  | 3.32740200 |

lnH<sub>2</sub>.anion

-753.95780646 a.u.

|    |             |             |             |
|----|-------------|-------------|-------------|
| C  | -0.12576600 | -0.35397600 | -0.06857200 |
| ln | 1.42654500  | 1.29222300  | -0.07503100 |
| C  | 2.79437000  | -0.46875900 | -0.14168900 |
| C  | 2.03168900  | -1.57247400 | -0.13746600 |
| C  | 0.54663600  | -1.51347600 | -0.11697100 |
| H  | 0.02345000  | -2.47362600 | -0.13128400 |
| H  | 2.46215100  | -2.57752600 | -0.14999400 |
| H  | 3.87312800  | -0.61188300 | -0.15067800 |
| H  | 1.37779100  | 2.35674500  | -1.51931200 |
| H  | 1.49315800  | 2.26022100  | 1.44191300  |
| C  | -1.62498300 | -0.31031900 | 0.00080000  |
| C  | -3.73728600 | -1.43790000 | 0.06468600  |
| N  | -2.34252500 | -1.52790100 | -0.40794800 |
| C  | -2.18129800 | -0.06963600 | 1.42922100  |
| C  | -3.66206700 | -0.43204800 | 1.23803000  |
| H  | -4.10333500 | -0.84099200 | 2.15095200  |
| H  | -4.22460700 | 0.47018600  | 0.98250500  |
| H  | -1.97532400 | 0.53873100  | -0.62092900 |
| C  | -2.17841500 | -1.86977200 | -1.80101300 |
| H  | -1.12512800 | -2.04656400 | -2.00734300 |
| H  | -2.73354800 | -2.78242600 | -2.03386500 |
| H  | -2.52066400 | -1.07599000 | -2.48533300 |
| C  | -4.20043300 | -2.82099400 | 0.52047500  |
| H  | -5.23621100 | -2.79251600 | 0.87024800  |
| H  | -4.13908500 | -3.53665100 | -0.30315200 |
| H  | -3.56304900 | -3.17799100 | 1.32976100  |
| C  | -4.71522700 | -0.90508600 | -0.99351800 |
| H  | -4.84525300 | -1.60772400 | -1.81913800 |
| H  | -5.69242200 | -0.73614500 | -0.53533600 |
| H  | -4.36452100 | 0.04557400  | -1.40113100 |
| C  | -1.52137700 | -1.00730000 | 2.43926500  |
| H  | -1.55656100 | -2.04042200 | 2.08907000  |
| H  | -0.47341300 | -0.74195700 | 2.58079000  |
| H  | -2.03746300 | -0.93922400 | 3.40162700  |
| C  | -2.01077300 | 1.37363300  | 1.88379800  |
| H  | -0.95603100 | 1.62439200  | 2.00575600  |
| H  | -2.44231000 | 2.06531000  | 1.15546500  |
| H  | -2.51411400 | 1.53211900  | 2.84269300  |

lnH.neutral

-753.31171655 a.u.

|    |             |             |             |
|----|-------------|-------------|-------------|
| C  | -0.14467900 | -0.31176600 | -0.11861200 |
| ln | 1.32510300  | 1.30945900  | -0.13965300 |
| C  | 2.79742000  | -0.27862700 | -0.13969500 |
| C  | 2.08573200  | -1.41090900 | -0.13542000 |
| C  | 0.58854900  | -1.42947400 | -0.12733100 |
| H  | 0.11229900  | -2.40853800 | -0.11090600 |
| H  | 2.56907300  | -2.38628400 | -0.13516100 |
| H  | 3.87854000  | -0.31635000 | -0.14253500 |
| H  | 1.28556000  | 3.03299300  | -0.15304600 |
| C  | -1.64012700 | -0.28309100 | -0.03417200 |
| C  | -3.70752700 | -1.46244400 | 0.10448000  |
| N  | -2.31077000 | -1.52644400 | -0.39161800 |
| C  | -2.17170400 | -0.00935700 | 1.39875800  |
| C  | -3.64703400 | -0.39823000 | 1.22623200  |
| H  | -4.08115200 | -0.76528400 | 2.15836400  |
| H  | -4.21988700 | 0.48262000  | 0.92569200  |
| H  | -2.00724300 | 0.54430800  | -0.67410900 |
| C  | -2.15986500 | -1.91607500 | -1.77629100 |
| H  | -2.52112000 | -1.15224100 | -2.48207000 |
| H  | -1.11062400 | -2.10110200 | -1.99822000 |
| H  | -2.70958300 | -2.83958500 | -1.96409200 |
| C  | -4.11276700 | -2.83696000 | 0.62902900  |
| H  | -5.14438400 | -2.82648700 | 0.98760000  |
| H  | -4.03793400 | -3.58675300 | -0.16147700 |
| H  | -3.45953600 | -3.13909500 | 1.44752600  |
| C  | -4.71236600 | -1.01052800 | -0.96268000 |
| H  | -4.83366000 | -1.75454000 | -1.75133500 |
| H  | -5.68706700 | -0.85275800 | -0.49769000 |
| H  | -4.40365100 | -0.06793000 | -1.42032400 |
| C  | -1.49392800 | -0.91299700 | 2.42768900  |
| H  | -1.51608800 | -1.95481800 | 2.10639700  |
| H  | -0.44979600 | -0.63358100 | 2.57513200  |
| H  | -2.00913100 | -0.83079000 | 3.38725100  |
| C  | -2.01825800 | 1.44828900  | 1.81200900  |
| H  | -0.96827400 | 1.71169000  | 1.96469200  |
| H  | -2.43418500 | 2.12174200  | 1.05927000  |
| H  | -2.53645800 | 1.63357900  | 2.75572300  |

NH<sub>2</sub>.cation

-618.39866575 a.u.

|   |            |             |             |
|---|------------|-------------|-------------|
| C | 0.79767800 | 0.31888200  | -0.13758700 |
| N | 1.40607100 | 1.65218200  | -0.37989800 |
| C | 2.86283700 | 1.43772500  | -0.37456200 |
| C | 3.07817700 | 0.14348800  | -0.16672300 |
| C | 1.79843500 | -0.55119900 | -0.02106700 |
| H | 1.66397800 | -1.60575700 | 0.16254500  |
| H | 4.05060900 | -0.32097500 | -0.11447100 |

|                    |             |             |             |                    |             |             |             |
|--------------------|-------------|-------------|-------------|--------------------|-------------|-------------|-------------|
| H                  | 3.51117600  | 2.28218600  | -0.53375200 | H                  | -3.28919400 | 0.69976000  | 1.18982600  |
| H                  | 1.10588700  | 2.31322900  | 0.34933000  | H                  | -0.96554400 | 1.45314600  | -0.08051700 |
| H                  | 1.08453600  | 2.03491700  | -1.27687600 | C                  | -0.96427900 | -0.32106200 | -2.15571100 |
| C                  | -0.68198100 | 0.23687000  | -0.00507400 | H                  | -1.27954800 | 0.67146800  | -2.51273900 |
| C                  | -2.52975300 | -1.21142000 | 0.34017600  | H                  | 0.10656300  | -0.41721200 | -2.32860900 |
| N                  | -1.15060300 | -1.10584700 | -0.22628800 | H                  | -1.47254900 | -1.07641600 | -2.75619400 |
| C                  | -1.19290000 | 0.57994500  | 1.42676000  | C                  | -3.10896300 | -2.12022600 | -0.56461700 |
| C                  | -2.59983200 | -0.03146300 | 1.33807400  | H                  | -4.16338800 | -2.24310700 | -0.30845700 |
| H                  | -2.95461100 | -0.34792800 | 2.31938600  | H                  | -2.97487600 | -2.43907700 | -1.60030700 |
| H                  | -3.29788600 | 0.72185300  | 0.96642100  | H                  | -2.51395600 | -2.77354600 | 0.07347800  |
| H                  | -1.13208300 | 0.96789300  | -0.71071700 | C                  | -3.59358600 | 0.24246300  | -1.21209800 |
| C                  | -0.97825400 | -1.61234200 | -1.57502100 | H                  | -3.63995800 | -0.06786700 | -2.25707900 |
| H                  | -1.46969600 | -0.99040100 | -2.33557700 | H                  | -4.60557000 | 0.20600200  | -0.80524200 |
| H                  | 0.08083700  | -1.68086600 | -1.82269400 | H                  | -3.25517600 | 1.28060200  | -1.17472900 |
| H                  | -1.39055200 | -2.61805800 | -1.63868000 | C                  | -1.13337700 | 1.17263500  | 2.52761400  |
| C                  | -2.68085800 | -2.56714100 | 1.01924900  | H                  | -1.64541300 | 0.91756800  | 3.45778400  |
| H                  | -3.68832600 | -2.68121200 | 1.42182900  | H                  | -0.08452200 | 1.36254400  | 2.76885800  |
| H                  | -2.51342600 | -3.37602700 | 0.30597900  | H                  | -1.57506700 | 2.09533000  | 2.14290500  |
| H                  | -1.96596200 | -2.67686400 | 1.83427500  | C                  | -0.62104400 | -1.22815100 | 2.08947600  |
| C                  | -3.62018000 | -1.04045700 | -0.72068000 | H                  | 0.41480900  | -1.05197800 | 2.38166700  |
| H                  | -3.64596100 | -1.87637400 | -1.41993000 | H                  | -1.17806900 | -1.55290800 | 2.97091000  |
| H                  | -4.59214400 | -0.98960200 | -0.22886500 | H                  | -0.63127900 | -2.03365600 | 1.35460900  |
| H                  | -3.48770100 | -0.11587300 | -1.28773400 |                    |             |             |             |
| C                  | -0.36015000 | -0.11639500 | 2.50153100  | O.neutral          |             |             |             |
| H                  | 0.63632700  | 0.32218100  | 2.59450300  | -637.93583880 a.u. |             |             |             |
| H                  | -0.85355500 | -0.01210600 | 3.46836300  | C                  | 0.75030400  | 0.54480700  | -0.15809500 |
| H                  | -0.24724600 | -1.17892000 | 2.28711500  | O                  | 1.28990600  | 1.78501800  | -0.27101400 |
| C                  | -1.24003800 | 2.07953100  | 1.69446500  | C                  | 2.63585100  | 1.63892200  | -0.31261800 |
| H                  | -1.73029900 | 2.62524700  | 0.88511600  | C                  | 2.96947000  | 0.33225000  | -0.23370800 |
| H                  | -1.79787200 | 2.27883900  | 2.61069700  | C                  | 1.73411600  | -0.38537800 | -0.13238800 |
| H                  | -0.24326500 | 2.50442700  | 1.86511400  | H                  | 1.58555800  | -1.44856900 | -0.04706200 |
|                    |             |             |             | H                  | 3.96630600  | -0.07401400 | -0.24936100 |
| NH.neutral         |             |             |             | H                  | 3.20766700  | 2.54527700  | -0.40473800 |
| -618.07594721 a.u. |             |             |             | C                  | -0.73245100 | 0.47292700  | -0.03793200 |
| C                  | 0.85423200  | 0.39739600  | 0.09535900  | C                  | -2.64363400 | -0.93482200 | 0.03513500  |
| N                  | 1.58648300  | 1.52679100  | 0.34425700  | N                  | -1.25271100 | -0.81261700 | -0.46659100 |
| C                  | 2.92376900  | 1.24733700  | 0.28343900  | C                  | -1.26668300 | 0.60533200  | 1.41051800  |
| C                  | 3.05438300  | -0.08336200 | -0.01436900 | C                  | -2.68824500 | 0.05119500  | 1.22804200  |
| C                  | 1.74538900  | -0.62140000 | -0.13316300 | H                  | -3.05280200 | -0.42998200 | 2.13743800  |
| H                  | 1.47084800  | -1.63813200 | -0.36172400 | H                  | -3.37158800 | 0.87211500  | 0.99862900  |
| H                  | 3.98503000  | -0.61107200 | -0.13873700 | H                  | -1.15012400 | 1.30839800  | -0.63149500 |
| H                  | 3.66240700  | 2.01274500  | 0.44700600  | C                  | -1.05656500 | -1.11597600 | -1.86822900 |
| H                  | 1.18848600  | 2.43019500  | 0.53463100  | H                  | -1.50531900 | -0.36926000 | -2.53999500 |
| C                  | -0.63741000 | 0.41740500  | 0.15138600  | H                  | 0.00888400  | -1.16694100 | -2.08724500 |
| C                  | -2.67691700 | -0.66796900 | -0.38633200 | H                  | -1.49260000 | -2.08866700 | -2.09861400 |
| N                  | -1.24734400 | -0.53813300 | -0.75398900 | C                  | -2.89174900 | -2.37758800 | 0.46439100  |
| C                  | -1.25595500 | 0.03874800  | 1.51931500  | H                  | -3.91421200 | -2.50182300 | 0.82712700  |
| C                  | -2.71037000 | -0.22249500 | 1.09754100  | H                  | -2.74726100 | -3.06055900 | -0.37535100 |
| H                  | -3.18764100 | -0.97003100 | 1.73382300  | H                  | -2.20054600 | -2.66127500 | 1.25802600  |

|   |             |             |             |
|---|-------------|-------------|-------------|
| C | -3.69480700 | -0.52233700 | -1.00210700 |
| H | -3.73627100 | -1.21952900 | -1.84027100 |
| H | -4.67945300 | -0.50326900 | -0.53210000 |
| H | -3.49126300 | 0.47735300  | -1.39283600 |
| C | -1.26102200 | 2.05117600  | 1.88765000  |
| H | -1.70909800 | 2.12577100  | 2.88088300  |
| H | -0.24133300 | 2.43639200  | 1.94718800  |
| H | -1.82771000 | 2.69282100  | 1.20978000  |
| C | -0.46830400 | -0.26385300 | 2.38102100  |
| H | -0.38461400 | -1.28701600 | 2.01267000  |
| H | 0.54004000  | 0.12737000  | 2.52368300  |
| H | -0.96761700 | -0.28251500 | 3.35186400  |

PH<sub>2</sub>.cation

-904.97994937 a.u.

|   |             |             |             |
|---|-------------|-------------|-------------|
| C | 0.56259100  | 0.18865900  | -0.09356100 |
| P | 1.54118200  | 1.63417300  | -0.47766100 |
| C | 3.13121100  | 0.85442800  | -0.39738400 |
| C | 2.88217400  | -0.42732300 | -0.10053700 |
| C | 1.45759500  | -0.79936500 | 0.05196100  |
| H | 1.14736300  | -1.81519400 | 0.26487600  |
| H | 3.66643300  | -1.16403500 | 0.02146400  |
| H | 4.08801300  | 1.32793900  | -0.54690300 |
| H | 1.39558200  | 2.69086700  | 0.42389900  |
| H | 1.24260700  | 2.17180800  | -1.73251600 |
| C | -0.93002700 | 0.13410000  | 0.02785100  |
| C | -2.80300500 | -1.28833800 | 0.37896700  |
| N | -1.42248100 | -1.20395200 | -0.18625500 |
| C | -1.44766200 | 0.49935700  | 1.45102100  |
| C | -2.86051500 | -0.09873800 | 1.36480700  |
| H | -3.22156900 | -0.40211300 | 2.34803400  |
| H | -3.54903400 | 0.65895500  | 0.98482500  |
| H | -1.36275700 | 0.86273000  | -0.68646700 |
| C | -1.25918700 | -1.71922300 | -1.53201800 |
| H | -1.73552600 | -1.09010600 | -2.29617000 |
| H | -0.20160000 | -1.81065200 | -1.78096900 |
| H | -1.69158300 | -2.71681000 | -1.59303300 |
| C | -3.89118700 | -1.11507700 | -0.68408600 |
| H | -3.92721800 | -1.95683100 | -1.37596100 |
| H | -4.86248000 | -1.04814100 | -0.19282700 |
| H | -3.74710700 | -0.19714700 | -1.25887700 |
| C | -2.97033800 | -2.63590700 | 1.07068900  |
| H | -3.97920100 | -2.73477400 | 1.47394700  |
| H | -2.81158800 | -3.45358400 | 0.36530800  |
| H | -2.25721200 | -2.74546800 | 1.88746400  |
| C | -1.48031200 | 2.00205700  | 1.69439600  |
| H | -0.47526500 | 2.41863700  | 1.80716000  |
| H | -1.99541700 | 2.53105700  | 0.88968900  |
| H | -2.00786400 | 2.21943000  | 2.62436400  |

|   |             |             |            |
|---|-------------|-------------|------------|
| C | -0.63050000 | -0.18983100 | 2.54224800 |
| H | 0.36650300  | 0.24553600  | 2.64110300 |
| H | -1.13389100 | -0.07156300 | 3.50230500 |
| H | -0.52245400 | -1.25655200 | 2.34426700 |

PH.neutral

-904.63800607 a.u.

|   |             |             |             |
|---|-------------|-------------|-------------|
| C | 0.61409300  | 0.29035600  | -0.07937700 |
| P | 1.64671300  | 1.77517900  | -0.06049200 |
| C | 3.13634300  | 0.78023000  | -0.21024400 |
| C | 2.82783200  | -0.52268900 | -0.06623600 |
| C | 1.40203200  | -0.80107600 | -0.00344400 |
| H | 1.00298200  | -1.80481400 | 0.08539400  |
| H | 3.56792900  | -1.31105600 | -0.00058900 |
| H | 4.13875800  | 1.17879100  | -0.25600000 |
| H | 1.46596200  | 2.21133600  | -1.39206900 |
| C | -0.88439900 | 0.31745200  | -0.02887600 |
| C | -2.90961000 | -0.92768600 | -0.12667300 |
| N | -1.48618800 | -0.90316000 | -0.54087000 |
| C | -1.49448500 | 0.43380400  | 1.39462500  |
| C | -2.94307700 | 0.00847900  | 1.10449200  |
| H | -3.39997200 | -0.47543000 | 1.96977400  |
| H | -3.54069000 | 0.89384700  | 0.87510100  |
| H | -1.23132400 | 1.20098200  | -0.60199500 |
| C | -1.23293500 | -1.16669600 | -1.94081000 |
| H | -1.56832300 | -0.35301700 | -2.60160200 |
| H | -0.16571900 | -1.31020200 | -2.10241200 |
| H | -1.74308600 | -2.08245900 | -2.24194700 |
| C | -3.30134900 | -2.36032400 | 0.22262000  |
| H | -4.35037300 | -2.41177700 | 0.52167600  |
| H | -3.16379600 | -3.01909800 | -0.63738900 |
| H | -2.68458200 | -2.73320600 | 1.04036700  |
| C | -3.86048800 | -0.38653700 | -1.20120000 |
| H | -3.90986300 | -1.04367200 | -2.07072800 |
| H | -4.86632800 | -0.30286200 | -0.78626600 |
| H | -3.55303700 | 0.60709600  | -1.53514700 |
| C | -1.42216900 | 1.85006100  | 1.94903100  |
| H | -1.97565300 | 1.91447800  | 2.88860100  |
| H | -0.39089100 | 2.14690000  | 2.14764200  |
| H | -1.85633500 | 2.57020000  | 1.25162500  |
| C | -0.83239500 | -0.53717100 | 2.37016100  |
| H | 0.19411200  | -0.23965800 | 2.58864800  |
| H | -1.39000200 | -0.54976300 | 3.30890900  |
| H | -0.81348100 | -1.54933300 | 1.96425200  |

SbH<sub>2</sub>.cation

-803.76083153 a.u.

|    |             |             |             |
|----|-------------|-------------|-------------|
| C  | -0.10492700 | -0.47891400 | -0.05955300 |
| Sb | 1.05598000  | 1.22452500  | -0.46384400 |

|                    |             |             |             |                     |             |             |             |
|--------------------|-------------|-------------|-------------|---------------------|-------------|-------------|-------------|
| C                  | 2.72028800  | -0.01615300 | -0.33823400 | C                   | -3.57314500 | -1.66565200 | 0.04711000  |
| C                  | 2.24047500  | -1.23101600 | -0.06261700 | N                   | -2.17243500 | -1.73005400 | -0.41396300 |
| C                  | 0.78219400  | -1.47100400 | 0.06416700  | C                   | -2.13755100 | -0.14162400 | 1.37886300  |
| H                  | 0.42646600  | -2.47659700 | 0.26293400  | C                   | -3.40529800 | -1.02687500 | 1.43099300  |
| H                  | 2.90965700  | -2.07410800 | 0.07079000  | H                   | -3.26755000 | -1.81708200 | 2.17134400  |
| H                  | 3.75868300  | 0.25287500  | -0.44497200 | H                   | -4.29091000 | -0.45689700 | 1.71891200  |
| H                  | 1.03535600  | 2.46654200  | 0.65705700  | H                   | -1.85898600 | 0.33044800  | -0.71892500 |
| H                  | 0.79620400  | 1.93566100  | -1.95730400 | C                   | -1.99661300 | -2.05453200 | -1.81588100 |
| C                  | -1.59687900 | -0.53741100 | 0.06637600  | H                   | -2.32231600 | -1.24190600 | -2.48278100 |
| C                  | -3.45558600 | -1.95244500 | 0.54114300  | H                   | -0.94575700 | -2.25048600 | -2.02236500 |
| N                  | -2.08926700 | -1.88680000 | -0.05974700 | H                   | -2.56226500 | -2.95245800 | -2.06394200 |
| C                  | -2.11129300 | -0.07627600 | 1.46201000  | C                   | -2.46883700 | 1.34544400  | 1.47895500  |
| C                  | -3.51725600 | -0.69383200 | 1.43560200  | H                   | -1.57175700 | 1.95658100  | 1.34688800  |
| H                  | -3.86707900 | -0.92645900 | 2.44201000  | H                   | -3.19736700 | 1.64339500  | 0.72239800  |
| H                  | -4.21756800 | 0.02573300  | 1.00598100  | H                   | -2.88589800 | 1.57868900  | 2.46089700  |
| H                  | -2.03454400 | 0.13897100  | -0.69516200 | C                   | -1.20435000 | -0.52813700 | 2.52470100  |
| C                  | -1.95256900 | -2.47641000 | -1.37794600 | H                   | -0.87778300 | -1.56445200 | 2.42701000  |
| H                  | -2.46017300 | -1.89928700 | -2.16272300 | H                   | -0.31644400 | 0.10654400  | 2.55975600  |
| H                  | -0.90145000 | -2.56310200 | -1.65199400 | H                   | -1.73325300 | -0.42127500 | 3.47444200  |
| H                  | -2.36898400 | -3.48274600 | -1.37062600 | C                   | -4.47081800 | -0.79939300 | -0.84949200 |
| C                  | -4.57101800 | -1.87955900 | -0.50523400 | H                   | -4.58602900 | -1.24076500 | -1.84061500 |
| H                  | -4.60610800 | -2.77107100 | -1.13161200 | H                   | -5.46364300 | -0.71795500 | -0.40457000 |
| H                  | -5.53175300 | -1.79433200 | 0.00380300  | H                   | -4.07655200 | 0.21101200  | -0.97112600 |
| H                  | -4.45876500 | -1.00461700 | -1.14969900 | C                   | -4.16647000 | -3.06531000 | 0.15071200  |
| C                  | -3.58202000 | -3.24742500 | 1.33507600  | H                   | -5.13379900 | -3.02483200 | 0.65537900  |
| H                  | -4.58088900 | -3.33658400 | 1.76481800  | H                   | -4.32799000 | -3.51021500 | -0.83261600 |
| H                  | -3.41796700 | -4.11154800 | 0.68866600  | H                   | -3.49840500 | -3.71096500 | 0.72126900  |
| H                  | -2.85146800 | -3.28176000 | 2.14297200  |                     |             |             |             |
| C                  | -1.27512500 | -0.67120300 | 2.59400600  | Se.neutral          |             |             |             |
| H                  | -0.28625600 | -0.21035900 | 2.65547600  | -2964.29116245 a.u. |             |             |             |
| H                  | -1.77567700 | -0.49896400 | 3.54742900  | C                   | 0.93875800  | -0.32465200 | 0.12579000  |
| H                  | -1.14192700 | -1.74572300 | 2.46659000  | Se                  | 2.47343500  | 0.27360300  | -0.75919500 |
| C                  | -2.16575700 | 1.44006500  | 1.59459900  | C                   | 3.47263700  | -0.66160400 | 0.49884300  |
| H                  | -1.16743900 | 1.88144100  | 1.67119400  | C                   | 2.67371600  | -1.29614200 | 1.38938100  |
| H                  | -2.69430400 | 1.90006900  | 0.75663100  | C                   | 1.27263800  | -1.11065400 | 1.18043500  |
| H                  | -2.69099500 | 1.71862900  | 2.50961800  | H                   | 0.51176900  | -1.56051000 | 1.80512200  |
|                    |             |             |             | H                   | 3.06911800  | -1.89907800 | 2.19575200  |
| SbH.neutral        |             |             |             | H                   | 4.54968500  | -0.66002100 | 0.46612600  |
| -803.44173943 a.u. |             |             |             | C                   | -0.43245500 | 0.08896600  | -0.31741800 |
| C                  | -0.04058800 | -0.52581300 | -0.07635500 | C                   | -2.77288300 | -0.28131000 | -0.13510900 |
| Sb                 | 1.24670000  | 1.19285600  | -0.11776300 | N                   | -1.43745400 | -0.91214300 | -0.00098300 |
| C                  | 2.73847000  | -0.32572200 | -0.15789400 | C                   | -0.98430700 | 1.36625400  | 0.36872700  |
| C                  | 2.16725700  | -1.53053000 | -0.03905200 | C                   | -2.47848600 | 1.22880700  | 0.03498900  |
| C                  | 0.70300900  | -1.63729400 | -0.00934900 | H                   | -3.10513800 | 1.67929300  | 0.80686100  |
| H                  | 0.23459900  | -2.61556100 | 0.06038400  | H                   | -2.69104500 | 1.75075300  | -0.90096800 |
| H                  | 2.75759500  | -2.44002400 | 0.02918200  | H                   | -0.39923700 | 0.28955100  | -1.40589500 |
| H                  | 3.81008300  | -0.18474900 | -0.16927100 | C                   | -1.26564400 | -2.18082800 | -0.67591700 |
| H                  | 1.14023400  | 1.39568300  | -1.81645700 | H                   | -1.25260400 | -2.08898900 | -1.77222000 |
| C                  | -1.53893400 | -0.47463500 | -0.03114500 | H                   | -0.32641000 | -2.63720400 | -0.36685600 |

|                           |             |             |             |                    |             |             |             |
|---------------------------|-------------|-------------|-------------|--------------------|-------------|-------------|-------------|
| H                         | -2.07454300 | -2.85778400 | -0.39897400 | H                  | -3.43681700 | 0.96907700  | -0.93097800 |
| C                         | -3.41670400 | -0.52105800 | -1.50594900 | C                  | -0.51061700 | 0.15495700  | 2.51327600  |
| H                         | -3.68948200 | -1.56742500 | -1.65078300 | H                  | 0.39313700  | 0.76671900  | 2.53770800  |
| H                         | -4.32535800 | 0.07751000  | -1.58919700 | H                  | -1.01680800 | 0.25755900  | 3.47580600  |
| H                         | -2.74501500 | -0.22338100 | -2.31442500 | H                  | -0.21255400 | -0.88760000 | 2.39088500  |
| C                         | -3.68984400 | -0.82108900 | 0.95823500  | C                  | -1.74937900 | 2.07511000  | 1.51910800  |
| H                         | -4.68604800 | -0.38104500 | 0.87831700  | H                  | -2.13100400 | 2.30970900  | 2.51505100  |
| H                         | -3.79303700 | -1.90503900 | 0.87536300  | H                  | -0.84067700 | 2.66323800  | 1.36447000  |
| H                         | -3.28231600 | -0.59112700 | 1.94270400  | H                  | -2.49193800 | 2.39793300  | 0.78662600  |
| C                         | -0.76332700 | 1.33499300  | 1.87969300  |                    |             |             |             |
| H                         | -1.13057900 | 0.40294200  | 2.31078800  |                    |             |             |             |
| H                         | 0.29510600  | 1.42946300  | 2.12585000  | SiH.anion          |             |             |             |
| H                         | -1.29780000 | 2.16629500  | 2.34396200  | -852.79109320 a.u. |             |             |             |
| C                         | -0.38215800 | 2.63814200  | -0.21224100 | C                  | 0.65347900  | 0.24726300  | 0.21253600  |
| H                         | -0.87328000 | 3.51702900  | 0.21109600  | Si                 | 1.86680300  | 1.64292700  | 0.49527100  |
| H                         | 0.68299100  | 2.70850400  | 0.01760900  | C                  | 3.28603300  | 0.44767000  | 0.35827100  |
| H                         | -0.50304300 | 2.67380800  | -1.29746100 | C                  | 2.80253900  | -0.72078300 | -0.16475900 |
|                           |             |             |             | C                  | 1.36607900  | -0.83042400 | -0.24151700 |
| SiH <sub>2</sub> .neutral |             |             |             | H                  | 0.89204900  | -1.70737400 | -0.68144700 |
| -853.37114952 a.u.        |             |             |             | H                  | 3.43369600  | -1.51890100 | -0.55278400 |
| C                         | 0.60618900  | 0.21733400  | -0.09397900 | H                  | 4.35487900  | 0.62556800  | 0.41794100  |
| Si                        | 1.82344900  | 1.64222400  | -0.16306600 | H                  | 1.74001400  | 2.12504500  | 1.92143600  |
| C                         | 3.30486500  | 0.51533900  | -0.16113600 | C                  | -0.84394100 | 0.28683300  | 0.24923200  |
| C                         | 2.82330900  | -0.73503800 | -0.11896700 | C                  | -2.95334500 | -0.58837800 | -0.43572200 |
| C                         | 1.34982400  | -0.89875300 | -0.08992200 | N                  | -1.52618200 | -0.49957400 | -0.78878700 |
| H                         | 0.90780200  | -1.89049400 | -0.06062100 | C                  | -1.49027400 | -0.27184400 | 1.54293700  |
| H                         | 3.45521500  | -1.61784800 | -0.10548100 | C                  | -2.95790000 | -0.40397100 | 1.10391300  |
| H                         | 4.36428200  | 0.72681800  | -0.18077400 | H                  | -3.46323200 | -1.23273400 | 1.60731100  |
| H                         | 1.75582800  | 2.54402400  | 1.01015800  | H                  | -3.49983700 | 0.51024800  | 1.36117100  |
| H                         | 1.67867900  | 2.46583700  | -1.38439000 | H                  | -1.16237000 | 1.34529200  | 0.17366200  |
| C                         | -0.89071800 | 0.26035100  | -0.02977600 | C                  | -1.22888600 | -0.07592900 | -2.13645000 |
| C                         | -2.93147500 | -0.91483700 | 0.07160900  | H                  | -1.49188500 | 0.97716400  | -2.32855500 |
| N                         | -1.53706500 | -0.98934900 | -0.40954700 | H                  | -0.15942400 | -0.18261200 | -2.31100500 |
| C                         | -1.45786900 | 0.58212900  | 1.39331900  | H                  | -1.76515400 | -0.70087500 | -2.85569200 |
| C                         | -2.74282700 | -0.27701300 | 1.45419700  | C                  | -3.49149700 | -1.95716600 | -0.85000000 |
| H                         | -2.61849600 | -1.06733000 | 2.19672600  | H                  | -4.55174200 | -2.05315000 | -0.59948300 |
| H                         | -3.61564300 | 0.31143300  | 1.74406700  | H                  | -3.38249200 | -2.10397500 | -1.92735200 |
| H                         | -1.22163600 | 1.07205100  | -0.70371100 | H                  | -2.93477600 | -2.74410700 | -0.34047100 |
| C                         | -1.38747700 | -1.30562000 | -1.81627300 | C                  | -3.81445000 | 0.50678600  | -1.08289500 |
| H                         | -1.71576400 | -0.48533800 | -2.47245100 | H                  | -3.88120400 | 0.38141100  | -2.16569000 |
| H                         | -0.34259700 | -1.51107900 | -2.04272200 | H                  | -4.82681300 | 0.46965200  | -0.67361700 |
| H                         | -1.96594700 | -2.19613400 | -2.06171500 | H                  | -3.40118700 | 1.49630700  | -0.87586100 |
| C                         | -3.53372500 | -2.31013000 | 0.18129400  | C                  | -1.31695100 | 0.68796000  | 2.71127500  |
| H                         | -4.49494100 | -2.26302000 | 0.69698500  | H                  | -1.81833300 | 0.30613600  | 3.60593900  |
| H                         | -3.70972900 | -2.75356800 | -0.80028100 | H                  | -0.25550400 | 0.81963500  | 2.93110300  |
| H                         | -2.86384400 | -2.96083300 | 0.74394100  | H                  | -1.73548700 | 1.66999100  | 2.47603700  |
| C                         | -3.83511200 | -0.04001500 | -0.81073300 | C                  | -0.91198500 | -1.63589400 | 1.91326600  |
| H                         | -3.96544200 | -0.47540300 | -1.80258600 | H                  | 0.13580900  | -1.54084700 | 2.19917200  |
| H                         | -4.82184200 | 0.04440800  | -0.35296500 | H                  | -1.47456000 | -2.06294900 | 2.74937500  |
|                           |             |             |             | H                  | -0.96334600 | -2.32116000 | 1.06553700  |

## S.neutral

-960.91020044 a.u.

|   |             |             |             |
|---|-------------|-------------|-------------|
| C | 0.63941600  | 0.26438600  | 0.04838700  |
| S | 1.55456900  | 1.70934200  | 0.20467500  |
| C | 3.03961900  | 0.87295500  | 0.07505200  |
| C | 2.84120800  | -0.46285300 | -0.09291500 |
| C | 1.46318700  | -0.81084500 | -0.10929900 |
| H | 1.08110300  | -1.81387200 | -0.23812600 |
| H | 3.64686400  | -1.17401100 | -0.20434400 |
| H | 3.97317800  | 1.40874500  | 0.12434700  |
| C | -0.85749600 | 0.29007500  | 0.12657000  |
| C | -2.88764200 | -0.87813400 | -0.26297300 |
| N | -1.46728600 | -0.75934600 | -0.67207200 |
| C | -1.44614300 | 0.03963200  | 1.53847400  |
| C | -2.90163300 | -0.28973500 | 1.16928000  |
| H | -3.35199700 | -0.97902100 | 1.88583300  |
| H | -3.49621400 | 0.62671000  | 1.18265900  |
| H | -1.19995800 | 1.29170800  | -0.19901800 |
| C | -1.22178200 | -0.66242500 | -2.09498700 |
| H | -1.55760000 | 0.29158000  | -2.52828600 |
| H | -0.15497200 | -0.76243400 | -2.29042400 |
| H | -1.73504900 | -1.47306500 | -2.61341000 |
| C | -3.29200100 | -2.34892400 | -0.29024400 |
| H | -4.33876300 | -2.46652000 | -0.00232500 |
| H | -3.16990300 | -2.76458300 | -1.29262200 |
| H | -2.67217900 | -2.92545800 | 0.39643300  |
| C | -3.83899100 | -0.07029000 | -1.15342900 |
| H | -3.89974400 | -0.48112400 | -2.16231600 |
| H | -4.84157500 | -0.08758000 | -0.72283300 |
| H | -3.52305000 | 0.97311800  | -1.22311800 |
| C | -0.78071800 | -1.15165200 | 2.22479200  |
| H | 0.25450300  | -0.92893300 | 2.48665400  |
| H | -1.32083800 | -1.39260500 | 3.14266600  |
| H | -0.78676100 | -2.03022500 | 1.57863800  |
| C | -1.34063700 | 1.27034900  | 2.42823700  |
| H | -1.85168700 | 1.09749000  | 3.37780400  |
| H | -0.29704800 | 1.50513900  | 2.64834600  |
| H | -1.79526200 | 2.14262200  | 1.95314600  |

SnH<sub>2</sub>.neutral

-778.08799552 a.u.

|    |             |             |             |
|----|-------------|-------------|-------------|
| C  | -0.10700200 | -0.45714300 | -0.06582200 |
| Sn | 1.28206600  | 1.18803900  | -0.14604400 |
| C  | 2.77102900  | -0.34325900 | -0.13240200 |
| C  | 2.11927600  | -1.51034100 | -0.08342600 |
| C  | 0.63595900  | -1.56973500 | -0.05561700 |
| H  | 0.16416800  | -2.54868900 | -0.01512100 |
| H  | 2.65096100  | -2.45827500 | -0.06150400 |

|   |             |             |             |
|---|-------------|-------------|-------------|
| H | 3.85084100  | -0.29992100 | -0.14744200 |
| H | 1.27372900  | 2.22317200  | 1.22664600  |
| H | 1.19086900  | 2.14745000  | -1.56731500 |
| C | -1.60406300 | -0.42279000 | 0.00298200  |
| C | -3.64186700 | -1.60037300 | 0.15568900  |
| N | -2.25078400 | -1.68540500 | -0.33331400 |
| C | -2.16568000 | -0.05524600 | 1.41791300  |
| C | -3.44695600 | -0.91650300 | 1.51493500  |
| H | -3.31467400 | -1.68130400 | 2.28239000  |
| H | -4.32025200 | -0.32209000 | 1.79092100  |
| H | -1.94362100 | 0.36405100  | -0.69603700 |
| C | -2.11339500 | -2.04173200 | -1.73187300 |
| H | -2.44696800 | -1.23962400 | -2.40770100 |
| H | -1.07104500 | -2.25452100 | -1.96233900 |
| H | -2.69526700 | -2.93785900 | -1.94701400 |
| C | -4.23733000 | -2.99377000 | 0.31618300  |
| H | -5.19522700 | -2.93382400 | 0.83675100  |
| H | -4.41779500 | -3.47034000 | -0.64889900 |
| H | -3.56054100 | -3.62245600 | 0.89530400  |
| C | -4.55618500 | -0.75911900 | -0.74819600 |
| H | -4.69278800 | -1.22821000 | -1.72367500 |
| H | -5.53942000 | -0.66301000 | -0.28524200 |
| H | -4.16294500 | 0.24681800  | -0.90608500 |
| C | -2.46445400 | 1.43959200  | 1.49746000  |
| H | -1.55864300 | 2.02956100  | 1.32966100  |
| H | -3.20659400 | 1.73771000  | 0.75427700  |
| H | -2.84873900 | 1.70274100  | 2.48521000  |
| C | -1.21349100 | -0.44169700 | 2.54864400  |
| H | -0.90327100 | -1.48343200 | 2.45391700  |
| H | -0.31649100 | 0.18062300  | 2.55887700  |
| H | -1.72074800 | -0.31826100 | 3.50816900  |

## SnH.anion

-777.54374622 a.u.

|    |             |             |             |
|----|-------------|-------------|-------------|
| C  | -0.08258300 | -0.40942400 | -0.00645400 |
| Sn | 1.35821400  | 1.30453900  | -0.14041600 |
| C  | 2.74984000  | -0.42083100 | -0.10382300 |
| C  | 2.06386100  | -1.57430200 | -0.17176900 |
| C  | 0.59184900  | -1.56577000 | -0.12824800 |
| H  | 0.07487500  | -2.52656800 | -0.19049500 |
| H  | 2.55177900  | -2.54774100 | -0.26166800 |
| H  | 3.83618900  | -0.46006100 | -0.14901500 |
| H  | 1.44003800  | 1.66052800  | 1.63147400  |
| C  | -1.58041300 | -0.35665300 | 0.08007900  |
| C  | -3.69277400 | -1.48427200 | 0.09544000  |
| N  | -2.30356000 | -1.54481600 | -0.39691400 |
| C  | -2.12089100 | -0.20247400 | 1.52589400  |
| C  | -3.60305400 | -0.55865800 | 1.33237900  |
| H  | -4.02804400 | -1.03068200 | 2.22226700  |

|                    |             |             |             |                    |             |             |             |
|--------------------|-------------|-------------|-------------|--------------------|-------------|-------------|-------------|
| H                  | -4.17398400 | 0.35529200  | 1.14688900  | C                  | -4.55705600 | -1.00972600 | -1.04700900 |
| H                  | -1.92869700 | 0.53111800  | -0.48542700 | H                  | -4.63663100 | -1.58632200 | -1.96971900 |
| C                  | -2.15289000 | -1.79944300 | -1.81002400 | H                  | -5.54635300 | -0.97242400 | -0.58790300 |
| H                  | -2.50093100 | -0.96467800 | -2.44049100 | H                  | -4.26777200 | 0.01248000  | -1.30145900 |
| H                  | -1.10135300 | -1.96310900 | -2.03606500 | C                  | -1.39121400 | -1.44900300 | 2.38053200  |
| H                  | -2.71051000 | -2.69603000 | -2.09366400 | H                  | -1.39035700 | -2.42458300 | 1.89296000  |
| C                  | -4.15369600 | -2.89387100 | 0.46374400  | H                  | -0.35589700 | -1.16578400 | 2.57483400  |
| H                  | -5.18507000 | -2.88688700 | 0.82734100  | H                  | -1.90667400 | -1.54046400 | 3.33882700  |
| H                  | -4.10416400 | -3.55363600 | -0.40607800 | C                  | -2.00915400 | 0.95958500  | 2.18989700  |
| H                  | -3.50710700 | -3.30421900 | 1.23980000  | H                  | -0.97148900 | 1.23950500  | 2.38224600  |
| C                  | -4.67971900 | -0.88114300 | -0.91548300 | H                  | -2.46825500 | 1.73545600  | 1.57229200  |
| H                  | -4.81847400 | -1.52723700 | -1.78474800 | H                  | -2.53049700 | 0.94188500  | 3.14952600  |
| H                  | -5.65238100 | -0.74192500 | -0.43804900 | CAAC.neutral       |             |             |             |
| H                  | -4.33103200 | 0.09410100  | -1.26226300 | -409.09927986 a.u. |             |             |             |
| C                  | -1.94439200 | 1.21396200  | 2.05631900  | C                  | -1.24057500 | 0.01579000  | -0.11617100 |
| H                  | -0.88534700 | 1.45613900  | 2.16199900  | N                  | -0.66627100 | -0.05869500 | 1.24492000  |
| H                  | -2.39825600 | 1.94325500  | 1.38010000  | C                  | 0.64061100  | 0.56214000  | 1.19751400  |
| H                  | -2.42045400 | 1.31600600  | 3.03654600  | C                  | 1.24851000  | 0.01221300  | -0.09389700 |
| C                  | -1.44237000 | -1.19189500 | 2.47192100  | C                  | 0.01755300  | 0.01486100  | -1.02520700 |
| H                  | -1.48501100 | -2.20519400 | 2.06818000  | H                  | 0.02295600  | 0.91136200  | -1.64895400 |
| H                  | -0.39201700 | -0.93069900 | 2.60566000  | H                  | 0.02640300  | -0.84567000 | -1.69696000 |
| H                  | -1.94059100 | -1.17566100 | 3.44595600  | C                  | -2.05024800 | 1.29717100  | -0.34965300 |
| Te.neutral         |             |             |             | H                  | -2.34592800 | 1.36256100  | -1.39800300 |
| -830.64210261 a.u. |             |             |             | H                  | -2.95756200 | 1.31470000  | 0.25675100  |
| C                  | -0.04403700 | -0.41045000 | -0.03322000 | H                  | -1.45945500 | 2.18509400  | -0.11206500 |
| Te                 | 1.11348700  | 1.30090800  | -0.06718000 | C                  | -2.12597500 | -1.20153600 | -0.35921200 |
| C                  | 2.64607600  | -0.06229500 | -0.13994300 | H                  | -2.96154300 | -1.22479700 | 0.34348100  |
| C                  | 2.16975000  | -1.32613000 | -0.13777100 | H                  | -2.53950600 | -1.18127300 | -1.36961500 |
| C                  | 0.74549700  | -1.50833600 | -0.08544100 | H                  | -1.54658500 | -2.11661600 | -0.23360400 |
| H                  | 0.29965400  | -2.49668900 | -0.09185100 | C                  | 2.38034300  | 0.88393600  | -0.62056600 |
| H                  | 2.83604500  | -2.17980700 | -0.17648600 | H                  | 3.21558500  | 0.90498500  | 0.08349400  |
| H                  | 3.68658600  | 0.21962700  | -0.17241800 | H                  | 2.75576400  | 0.49800300  | -1.57087600 |
| C                  | -1.54163000 | -0.38903900 | 0.06859100  | H                  | 2.04409200  | 1.91041900  | -0.78084100 |
| C                  | -3.56269100 | -1.63721700 | -0.06275600 | C                  | 1.74842700  | -1.41431900 | 0.13364000  |
| N                  | -2.15662400 | -1.56360600 | -0.52831600 | H                  | 2.08079700  | -1.85888700 | -0.80700100 |
| C                  | -2.09692200 | -0.40422100 | 1.51843400  | H                  | 2.59203000  | -1.42228700 | 0.82783400  |
| C                  | -3.55317700 | -0.81518800 | 1.24801000  | H                  | 0.95477400  | -2.03508400 | 0.55088200  |
| H                  | -3.97186000 | -1.37926900 | 2.08350600  | H                  | 1.22276400  | 0.30076900  | 2.08579500  |
| H                  | -4.16556600 | 0.08088500  | 1.12241200  | H                  | 0.57942400  | 1.66540200  | 1.15117500  |
| H                  | -1.91190400 | 0.53690400  | -0.41327100 | C                  | -1.49840200 | 0.39472800  | 2.33336000  |
| C                  | -1.95627900 | -1.69530500 | -1.95568600 | H                  | -2.47104900 | -0.09784800 | 2.29722800  |
| H                  | -2.32364800 | -0.82856400 | -2.52524400 | H                  | -1.02675200 | 0.12863500  | 3.28071800  |
| H                  | -0.89489500 | -1.81016300 | -2.16991700 | H                  | -1.66337400 | 1.48347700  | 2.33279000  |
| H                  | -2.47006100 | -2.58604100 | -2.31908300 | cAAc1.BH.neutral   |             |             |             |
| C                  | -3.93313400 | -3.09866400 | 0.17094700  | -508.26475751 a.u. |             |             |             |
| H                  | -4.96929200 | -3.18563300 | 0.50461200  | C                  | -0.36165700 | -3.77645000 | -1.00237300 |
| H                  | -3.82623900 | -3.67592600 | -0.74980000 | B                  | 0.77622900  | -4.87262500 | -1.18662000 |
| H                  | -3.28273600 | -3.53839000 | 0.92707700  | C                  | 0.21179300  | -5.92969700 | -2.19551800 |
|                    |             |             |             | C                  | -1.09181200 | -5.64404000 | -2.26351500 |







|                    |             |             |             |                    |             |             |             |
|--------------------|-------------|-------------|-------------|--------------------|-------------|-------------|-------------|
| H                  | -1.14677600 | -7.06391800 | -1.18924900 | B                  | 2.38871600  | 1.79531500  | -0.26419300 |
| H                  | 1.34720300  | -7.30925600 | -0.55769400 | H                  | 2.96256400  | -1.98664500 | 1.40491100  |
| H                  | 1.94103100  | -4.84952300 | 1.05889000  | H                  | 4.72560700  | 0.04863800  | 1.63977700  |
| C                  | -0.25355600 | -2.63019200 | 0.34016300  | H                  | 4.43568200  | 2.22762600  | 0.69762900  |
| C                  | -1.52870500 | -1.81510000 | 0.00376900  | H                  | 2.23674900  | 2.85682200  | -0.78880300 |
| C                  | -0.98039200 | -0.39727700 | 0.14156000  | C                  | -0.47517100 | 1.95176100  | -1.56332400 |
| C                  | 0.37979700  | -0.45348200 | -0.02655400 | H                  | 0.28006200  | 2.71511800  | -1.72771200 |
| N                  | 0.82734100  | -1.73487900 | -0.12667000 | H                  | -0.96240300 | 1.70924700  | -2.51061500 |
| B                  | -1.67272500 | 0.93070100  | 0.30721600  | H                  | -1.24353800 | 2.31254400  | -0.87473900 |
| C                  | -0.77931900 | 2.24723800  | 0.34051000  | C                  | -0.23721000 | -2.33319200 | 0.88139200  |
| C                  | 0.55072100  | 2.21037800  | 0.14211300  | H                  | -0.53247800 | -1.71111300 | 1.72413500  |
| B                  | 1.22775200  | 0.86198500  | -0.21164200 | H                  | -1.11932200 | -2.89263600 | 0.56004800  |
| H                  | -2.85737200 | 1.02460900  | 0.43424300  | H                  | 0.53215300  | -3.03821500 | 1.20670400  |
| H                  | -1.24890100 | 3.21431400  | 0.51417000  | C                  | 0.72652600  | -2.39554700 | -1.41721400 |
| H                  | 1.12146400  | 3.13534900  | 0.15234700  | H                  | -0.12294800 | -2.99126400 | -1.76751700 |
| H                  | 2.32433700  | 0.82373900  | -0.67596300 | H                  | 1.10306900  | -1.80266000 | -2.25485200 |
| C                  | 2.20782400  | -2.12657000 | -0.00663900 | H                  | 1.52183200  | -3.07237100 | -1.09625700 |
| H                  | 2.46242100  | -2.40083600 | 1.02374100  | H                  | -1.09998400 | -0.76400500 | -1.77915400 |
| H                  | 2.41963500  | -2.98365400 | -0.64957600 |                    |             |             |             |
| H                  | 2.84409100  | -1.30353200 | -0.32112100 |                    |             |             |             |
| C                  | -1.98244100 | -1.96614800 | -1.45742900 | cAAc3.neutral      |             |             |             |
| H                  | -1.13152000 | -1.88767300 | -2.13635700 | -456.36320686 a.u. |             |             |             |
| H                  | -2.49498200 | -2.90589900 | -1.65573100 | C                  | -0.16510700 | -2.68735300 | 0.07509900  |
| H                  | -2.67703200 | -1.15619200 | -1.68708700 | C                  | -1.46324000 | -1.86717800 | -0.09025300 |
| C                  | -2.67646500 | -2.12873100 | 0.95400400  | C                  | -0.94198200 | -0.44037400 | 0.04863200  |
| H                  | -3.00215000 | -3.16717100 | 0.85961600  | C                  | 0.42507200  | -0.46680900 | -0.07840200 |
| H                  | -2.38413000 | -1.95252000 | 1.99031100  | N                  | 0.90206400  | -1.73149600 | -0.20960700 |
| H                  | -3.52998800 | -1.48607900 | 0.73289700  | B                  | -1.65733000 | 0.86813000  | 0.23792500  |
| H                  | -0.17317000 | -2.63747100 | 1.44448700  | C                  | -0.78791400 | 2.20201300  | 0.29554000  |
|                    |             |             |             | C                  | 0.55014700  | 2.19424400  | 0.15041800  |
| cAAc3.CH.anion     |             |             |             | B                  | 1.27127000  | 0.86267200  | -0.16885800 |
| -648.70772455 a.u. |             |             |             | H                  | -2.84320200 | 0.93909900  | 0.37072300  |
| C                  | -1.90615400 | -0.04099000 | 0.02084400  | H                  | -1.28252400 | 3.15945600  | 0.45386000  |
| C                  | -3.24059300 | -0.04332700 | -0.43533600 | H                  | 1.09981700  | 3.13107100  | 0.18941200  |
| C                  | -4.03992400 | 0.55886500  | 0.54652100  | H                  | 2.40672400  | 0.83966600  | -0.52930700 |
| C                  | -3.19700600 | 0.95315200  | 1.60710300  | C                  | 2.27246600  | -2.14829300 | -0.06902700 |
| C                  | -1.88227000 | 0.58984300  | 1.28381500  | H                  | 2.49151700  | -2.45431100 | 0.96132800  |
| H                  | -0.99867000 | 0.76424000  | 1.88603200  | H                  | 2.47004400  | -2.99833200 | -0.72409600 |
| H                  | -3.51360800 | 1.43567800  | 2.52273700  | H                  | 2.93896300  | -1.33452100 | -0.34248200 |
| H                  | -5.11361000 | 0.68571900  | 0.50624700  | C                  | -2.03055900 | -2.06048500 | -1.50069900 |
| H                  | -3.57319200 | -0.44374000 | -1.38601300 | H                  | -1.27091000 | -1.83924500 | -2.25309400 |
| C                  | -0.72986900 | -0.43759900 | -0.79943000 | H                  | -2.37689200 | -3.08751200 | -1.64627600 |
| C                  | 0.30695600  | -1.48114300 | -0.25762500 | H                  | -2.87320300 | -1.38547100 | -1.66043700 |
| C                  | 1.49713600  | -0.61962600 | 0.14536200  | C                  | -2.51287000 | -2.24123000 | 0.94927700  |
| C                  | 1.30575400  | 0.65029400  | -0.39831600 | H                  | -2.81232100 | -3.28756900 | 0.84580800  |
| N                  | 0.13739800  | 0.75815200  | -1.03102000 | H                  | -2.13161500 | -2.08759300 | 1.95971100  |
| B                  | 2.73036400  | -0.91929400 | 0.90516900  | H                  | -3.40234400 | -1.62147000 | 0.82629000  |
| C                  | 3.81318200  | 0.24482000  | 1.07246100  | H                  | -0.05019900 | -3.05426500 | 1.10522500  |
| C                  | 3.66021100  | 1.47912200  | 0.54670900  | H                  | -0.10857300 | -3.54503300 | -0.60017900 |
|                    |             |             |             | NHC1.BH.neutral    |             |             |             |

|                    |             |             |             |                    |             |             |             |
|--------------------|-------------|-------------|-------------|--------------------|-------------|-------------|-------------|
| -484.99252708 a.u. |             |             | H           | -2.66167900        | -0.94043600 | -1.86399600 |             |
| C                  | -0.97129700 | 0.01459400  | -0.12589700 | C                  | 1.14584200  | -2.07706400 | 2.15294200  |
| B                  | -2.10997100 | 0.90927000  | -0.76948700 | H                  | 1.93078700  | -2.27863800 | 1.41508100  |
| C                  | -3.44718000 | 0.40234200  | -0.10595200 | H                  | 1.41710600  | -1.16097700 | 2.67997500  |
| C                  | -3.09557300 | -0.62154700 | 0.67705300  | H                  | 1.09919000  | -2.89316100 | 2.87915300  |
| C                  | -1.60363700 | -0.86182000 | 0.65828200  |                    |             |             |             |
| H                  | -1.12410300 | -1.65398100 | 1.22264600  | NHC1.neutral       |             |             |             |
| H                  | -3.76315200 | -1.23471300 | 1.27222900  | -305.97862582 a.u. |             |             |             |
| H                  | -4.46661700 | 0.73683300  | -0.23233400 | C                  | 0.51791700  | -0.04003200 | -0.37200000 |
| H                  | -1.97772200 | 1.73805400  | -1.61166900 | N                  | 1.40080600  | -1.19857200 | -0.34641300 |
| C                  | 0.50566700  | 0.05415200  | -0.35451200 | C                  | 2.62963800  | -0.67667100 | 0.11597900  |
| H                  | 0.69786500  | 0.20420500  | -1.44765300 | H                  | 3.43059300  | -1.33550700 | 0.40879000  |
| N                  | 1.18181900  | 1.13315500  | 0.37543600  | N                  | 1.42408000  | 1.07688600  | -0.60378700 |
| C                  | 2.48975600  | 0.65133100  | 0.58030100  | C                  | 2.64317000  | 0.64673100  | -0.03370000 |
| H                  | 3.26455800  | 1.30551100  | 0.94575900  | H                  | 3.45793100  | 1.33800900  | 0.10640800  |
| N                  | 1.22696400  | -1.13955900 | 0.08364400  | C                  | 0.85778300  | -2.34502500 | 0.34559000  |
| C                  | 2.51779900  | -0.66931800 | 0.41483000  | H                  | 1.59535300  | -3.14664400 | 0.35846500  |
| H                  | 3.32022500  | -1.36124800 | 0.61118400  | H                  | 0.57576200  | -2.10550500 | 1.38223500  |
| C                  | 1.02355400  | 2.44542900  | -0.20624400 | H                  | -0.02653500 | -2.70646700 | -0.18027100 |
| H                  | 1.32537400  | 2.46780700  | -1.26453900 | C                  | 0.90590100  | 2.35965700  | -0.18655400 |
| H                  | -0.01873600 | 2.75924900  | -0.13824900 | H                  | 0.02786700  | 2.61231000  | -0.78188000 |
| H                  | 1.62852200  | 3.16212800  | 0.34779700  | H                  | 0.62146100  | 2.36345200  | 0.87675100  |
| C                  | 1.15060900  | -2.24846400 | -0.84305700 | H                  | 1.65953700  | 3.12884100  | -0.35134400 |
| H                  | 0.11560400  | -2.57726100 | -0.93754000 | H                  | 0.02207600  | 0.07750900  | 0.62232900  |
| H                  | 1.52410000  | -1.97460000 | -1.84108800 | H                  | -0.24802100 | -0.11964500 | -1.14511900 |
| H                  | 1.74211100  | -3.08079600 | -0.46314900 |                    |             |             |             |
|                    |             |             |             | NHC2.BH.neutral    |             |             |             |
| NHC1.CH.anion      |             |             |             | -638.65043165 a.u. |             |             |             |
| -498.31403594 a.u. |             |             |             | C                  | 1.65642900  | -5.04341900 | -1.36116500 |
| C                  | 0.88744400  | -0.43028700 | -0.20356600 | B                  | 2.54110200  | -6.35557100 | -1.29554500 |
| C                  | 1.52836900  | 0.82512500  | -0.19495100 | C                  | 2.13396300  | -7.18275300 | -2.57438400 |
| C                  | 2.61680200  | 0.77320800  | -1.07953900 | C                  | 1.16032300  | -6.48268300 | -3.16298800 |
| C                  | 2.65227500  | -0.51953100 | -1.63979200 | C                  | 0.86491800  | -5.19660400 | -2.42585600 |
| C                  | 1.58967500  | -1.26346400 | -1.10332500 | H                  | 0.09819300  | -4.49769500 | -2.74187200 |
| H                  | 1.34473500  | -2.29267300 | -1.33273100 | H                  | 0.61892600  | -6.76097200 | -4.06015700 |
| H                  | 3.37576100  | -0.87854900 | -2.36131500 | H                  | 2.49543600  | -8.13187900 | -2.94247100 |
| H                  | 3.30566700  | 1.58000900  | -1.29372500 | H                  | 3.30150200  | -6.66110300 | -0.43428000 |
| H                  | 1.21879100  | 1.67643500  | 0.40100900  | C                  | 1.62862100  | -3.87218700 | -0.43018300 |
| C                  | -0.31380900 | -0.75863100 | 0.61375400  | C                  | 2.20509100  | -1.66324300 | -0.27829600 |
| H                  | -0.58544800 | 0.12945200  | 1.19476500  | C                  | 0.80958700  | -1.75360000 | -0.17503600 |
| N                  | -1.51997900 | -1.20776900 | -0.15362600 | C                  | 0.05368900  | -0.66890100 | 0.20882400  |
| C                  | -1.51237500 | -2.61311500 | -0.09279300 | C                  | 0.71746500  | 0.53529400  | 0.47896800  |
| H                  | -2.15116900 | -3.19812800 | -0.73590700 | C                  | 2.09258800  | 0.62509000  | 0.37592300  |
| N                  | -0.16286300 | -1.91241000 | 1.55791700  | C                  | 2.86134800  | -0.48433000 | 0.00004300  |
| C                  | -0.72447700 | -3.02221000 | 0.90088500  | N                  | 2.69294600  | -2.89971900 | -0.70416300 |
| H                  | -0.56183000 | -4.02334800 | 1.26852800  | N                  | 0.42212200  | -3.05196100 | -0.52707800 |
| C                  | -1.71091700 | -0.59377000 | -1.44993700 | H                  | -1.02157200 | -0.73995800 | 0.30605600  |
| H                  | -1.76152700 | 0.48943700  | -1.32883600 | H                  | 0.14288500  | 1.39982400  | 0.78324600  |
| H                  | -0.89731100 | -0.81021600 | -2.15165500 | H                  | 2.58869700  | 1.55982000  | 0.60061800  |

|                    |             |             |             |                    |             |             |             |
|--------------------|-------------|-------------|-------------|--------------------|-------------|-------------|-------------|
| H                  | 3.93898500  | -0.41205600 | -0.06213100 | C                  | 1.56812600  | -0.71852100 | 0.16934000  |
| H                  | 1.73974300  | -4.24437400 | 0.61566000  | C                  | 2.72252400  | -1.41024500 | -0.12123100 |
| C                  | 4.03352200  | -3.29427400 | -0.35348000 | C                  | 3.91030900  | -0.67958700 | -0.26157300 |
| H                  | 4.29239200  | -4.21711500 | -0.87283300 | C                  | 3.91844200  | 0.69573100  | -0.12739400 |
| H                  | 4.73536400  | -2.52564200 | -0.67258900 | C                  | 2.73914200  | 1.39935200  | 0.15288100  |
| H                  | 4.15041300  | -3.45397600 | 0.72809000  | N                  | 0.27741500  | 1.09634200  | 0.61417100  |
| C                  | -0.76694700 | -3.59897900 | 0.08426100  | N                  | 0.26398400  | -1.17328600 | 0.39273900  |
| H                  | -1.62819000 | -2.98343500 | -0.17154300 | H                  | 2.71787100  | -2.48532700 | -0.24324300 |
| H                  | -0.94217200 | -4.60303500 | -0.30003300 | H                  | 4.82908300  | -1.20289600 | -0.49008900 |
| H                  | -0.68077300 | -3.64641000 | 1.17891600  | H                  | 4.84354500  | 1.24253800  | -0.25150900 |
| NHC2.CH.anion      |             |             |             | H                  | 2.74722000  | 2.47772400  | 0.24096300  |
| -651.98596529 a.u. |             |             |             | C                  | -0.14931600 | 2.41570200  | 0.21884400  |
| C                  | 1.64614900  | -5.06429300 | -1.36030200 | H                  | -1.16233200 | 2.59180200  | 0.58050000  |
| C                  | 1.86454400  | -6.38605900 | -0.91589000 | H                  | 0.50143100  | 3.16359000  | 0.66928800  |
| C                  | 1.75843500  | -7.23849600 | -2.02309200 | H                  | -0.13421000 | 2.54609700  | -0.87276300 |
| C                  | 1.47404200  | -6.44427100 | -3.15403000 | C                  | -0.17773000 | -2.38622800 | -0.24972600 |
| C                  | 1.40436300  | -5.10468700 | -2.74923100 | H                  | -1.19312000 | -2.61709000 | 0.07228600  |
| H                  | 1.20268500  | -4.24620000 | -3.37573500 | H                  | -0.16298500 | -2.30324900 | -1.34596300 |
| H                  | 1.33341200  | -6.80776100 | -4.16408800 | H                  | 0.46374700  | -3.21464900 | 0.04681200  |
| H                  | 1.87393800  | -8.31433000 | -2.01276200 | H                  | -0.90690000 | 0.09929000  | -0.83716200 |
| H                  | 2.07621300  | -6.67320000 | 0.10746700  | H                  | -1.47863500 | -0.06241800 | 0.85505700  |
| C                  | 1.67487300  | -3.87608500 | -0.48965700 | NHC3.BH.neutral    |             |             |             |
| C                  | 2.19278800  | -1.63726500 | -0.31777100 | -612.09930588 a.u. |             |             |             |
| C                  | 0.80391000  | -1.78399800 | -0.07169600 | C                  | 1.65524600  | -5.08381500 | -1.37355800 |
| C                  | 0.06863500  | -0.74271900 | 0.45271000  | B                  | 2.55791500  | -6.38572400 | -1.36793200 |
| C                  | 0.72448900  | 0.47478200  | 0.71569500  | C                  | 2.16568000  | -7.15376500 | -2.68774900 |
| C                  | 2.07556100  | 0.61752000  | 0.47631700  | C                  | 1.18705300  | -6.43659100 | -3.24717100 |
| C                  | 2.83524400  | -0.45043300 | -0.03746600 | C                  | 0.87269800  | -5.19139400 | -2.45002600 |
| N                  | 2.65129600  | -2.82137900 | -0.84706500 | H                  | 0.10181400  | -4.48450900 | -2.73750500 |
| N                  | 0.44291800  | -3.05469100 | -0.45579100 | H                  | 0.65473300  | -6.67661600 | -4.16073700 |
| H                  | -0.98752700 | -0.85941000 | 0.66046800  | H                  | 2.53997500  | -8.07925400 | -3.10058100 |
| H                  | 0.15959700  | 1.30269100  | 1.12593800  | H                  | 3.32256900  | -6.72016000 | -0.52137900 |
| H                  | 2.56598200  | 1.55692100  | 0.69958400  | C                  | 1.60905900  | -3.96237500 | -0.38275300 |
| H                  | 3.89945300  | -0.34311000 | -0.20538800 | C                  | 2.18554300  | -1.74692300 | -0.18525100 |
| H                  | 1.89470900  | -4.21158400 | 0.55105300  | C                  | 0.82240300  | -1.81931500 | -0.11226300 |
| C                  | 4.04083900  | -3.17146200 | -0.81778300 | B                  | -0.02089500 | -0.58156500 | 0.19953300  |
| H                  | 4.15517700  | -4.13180400 | -1.32112500 | C                  | 0.74120100  | 0.77271700  | 0.49026300  |
| H                  | 4.62809700  | -2.41898000 | -1.34718600 | C                  | 2.07784200  | 0.85030300  | 0.41014700  |
| H                  | 4.42710300  | -3.25669600 | 0.21052800  | B                  | 2.93228300  | -0.41216200 | 0.02554600  |
| C                  | -0.75229100 | -3.67784800 | 0.03144200  | N                  | 2.68158300  | -2.98271000 | -0.56500000 |
| H                  | -1.62405300 | -3.07950600 | -0.23946000 | N                  | 0.42292300  | -3.11866300 | -0.45728300 |
| H                  | -0.83374100 | -4.65887300 | -0.43721400 | H                  | -1.21198900 | -0.61917200 | 0.22556500  |
| H                  | -0.74024300 | -3.80261900 | 1.12605400  | H                  | 0.17632000  | 1.66439700  | 0.75348900  |
| NHC2.neutral       |             |             |             | H                  | 2.56775600  | 1.80052100  | 0.60871600  |
| -459.63675374 a.u. |             |             |             | H                  | 4.11483100  | -0.33364900 | -0.09778000 |
| C                  | -0.58920100 | -0.00615800 | 0.22443300  | H                  | 1.69572400  | -4.40141200 | 0.64400400  |
| C                  | 1.57638700  | 0.67808200  | 0.30560100  | C                  | 4.02345100  | -3.42148200 | -0.28979300 |
|                    |             |             |             | H                  | 4.10888400  | -3.84980700 | 0.71927200  |

|   |             |             |             |
|---|-------------|-------------|-------------|
| H | 4.32538400  | -4.18432100 | -1.01000000 |
| H | 4.70602300  | -2.57951000 | -0.37455900 |
| C | -0.78123600 | -3.68119700 | 0.10646300  |
| H | -1.59796800 | -2.97029200 | 0.00354700  |
| H | -1.04611800 | -4.59641700 | -0.42302600 |
| H | -0.65409000 | -3.92098400 | 1.17232300  |

NHC3.CH.anion

-625.43410052 a.u.

|   |             |             |             |
|---|-------------|-------------|-------------|
| C | 1.65615500  | -5.12282000 | -1.32833300 |
| C | 1.89264300  | -6.45279900 | -0.92480700 |
| C | 1.76524200  | -7.27668100 | -2.05285500 |
| C | 1.44980600  | -6.45543400 | -3.15454200 |
| C | 1.38178200  | -5.12661900 | -2.71161000 |
| H | 1.16013400  | -4.25297200 | -3.31010400 |
| H | 1.28714800  | -6.79270800 | -4.17034600 |
| H | 1.88701700  | -8.35170000 | -2.07372500 |
| H | 2.13012200  | -6.76587200 | 0.08503100  |
| C | 1.69911000  | -3.95030700 | -0.43334400 |
| C | 2.17846800  | -1.68711700 | -0.31822500 |
| C | 0.82674900  | -1.83884400 | -0.05100500 |
| B | -0.00854100 | -0.67215200 | 0.46405100  |
| C | 0.70708200  | 0.72955900  | 0.67028700  |
| C | 2.01274200  | 0.87718700  | 0.41012900  |
| B | 2.87705600  | -0.34612200 | -0.11181200 |
| N | 2.65674500  | -2.88562200 | -0.78857500 |
| N | 0.47467400  | -3.13141400 | -0.36053900 |
| H | -1.17109900 | -0.78780800 | 0.71899000  |
| H | 0.13642200  | 1.58856600  | 1.02155100  |
| H | 2.47560800  | 1.85260000  | 0.55535000  |
| H | 4.04442500  | -0.20050200 | -0.32579000 |
| H | 1.94335200  | -4.30837100 | 0.60061800  |
| C | 4.04251700  | -3.24662600 | -0.83571800 |
| H | 4.14812500  | -4.11723500 | -1.48390600 |
| H | 4.63046300  | -2.41874100 | -1.22978000 |
| H | 4.42684100  | -3.50996800 | 0.16280100  |
| C | -0.71306900 | -3.78131400 | 0.10838000  |
| H | -1.56964400 | -3.11754300 | -0.00185000 |
| H | -0.86641300 | -4.68433200 | -0.48345200 |
| H | -0.62506400 | -4.07213500 | 1.16765200  |

NHC3.neutral

-433.08529407 a.u.

|   |             |             |             |
|---|-------------|-------------|-------------|
| C | -0.60160400 | -0.00166400 | 0.19740900  |
| C | 1.58155900  | 0.66759600  | 0.24701300  |
| C | 1.57376900  | -0.69451600 | 0.13196900  |
| B | 2.87400100  | -1.48569700 | -0.08235400 |
| C | 4.21512800  | -0.66721600 | -0.21705700 |
| C | 4.22277000  | 0.66921200  | -0.10420300 |

|   |             |             |             |
|---|-------------|-------------|-------------|
| B | 2.89088100  | 1.46870600  | 0.16702200  |
| N | 0.28504200  | 1.10121000  | 0.52634200  |
| N | 0.27214100  | -1.15408600 | 0.33584300  |
| H | 2.88043800  | -2.67557500 | -0.14806200 |
| H | 5.15231500  | -1.18791600 | -0.39995700 |
| H | 5.16598400  | 1.20253100  | -0.19810000 |
| H | 2.91089700  | 2.65260600  | 0.30174500  |
| C | -0.17060200 | 2.41953500  | 0.16593100  |
| H | -1.09725900 | 2.64775200  | 0.69397900  |
| H | 0.57786400  | 3.15566900  | 0.44987300  |
| H | -0.35721100 | 2.50369300  | -0.91472900 |
| C | -0.19809200 | -2.38800900 | -0.24018200 |
| H | -1.12779200 | -2.69103600 | 0.24297700  |
| H | -0.38459700 | -2.28756300 | -1.31946800 |
| H | 0.54169300  | -3.16979400 | -0.08446300 |
| H | -0.97243500 | 0.08914800  | -0.85263000 |
| H | -1.46554400 | -0.05311300 | 0.86503300  |

Compounds in D<sub>0</sub>

AlH2.anion

-805.72354910 a.u.

|    |             |             |             |
|----|-------------|-------------|-------------|
| C  | 0.55786900  | -0.33530500 | 0.03347300  |
| Al | 2.00257700  | 1.11896200  | -0.15283200 |
| C  | 3.39694300  | -0.30319800 | -0.15074900 |
| C  | 2.74485300  | -1.49445100 | 0.00758000  |
| C  | 1.31691500  | -1.54053200 | 0.10202700  |
| H  | 0.86903400  | -2.51864000 | 0.25321100  |
| H  | 3.27135900  | -2.45025200 | 0.07194700  |
| H  | 4.48219000  | -0.33896600 | -0.21563600 |
| H  | 2.07993300  | 2.14510700  | 1.11128000  |
| H  | 1.88889300  | 1.98723700  | -1.52565100 |
| C  | -0.81216300 | -0.34408300 | 0.05087300  |
| C  | -2.90468400 | 0.58223200  | -0.51016200 |
| N  | -1.62371200 | 0.80284100  | 0.15999100  |
| C  | -1.76959800 | -1.54497700 | -0.01094900 |
| C  | -3.15943900 | -0.88414200 | -0.14785100 |
| H  | -3.78775600 | -1.38604000 | -0.88809700 |
| H  | -3.68291500 | -0.91567300 | 0.81122600  |
| C  | -1.01937000 | 2.10875000  | 0.05093800  |
| H  | -0.25736200 | 2.22391400  | 0.82019500  |
| H  | -0.53622500 | 2.27349300  | -0.92020200 |
| H  | -1.78084600 | 2.87416600  | 0.20735800  |
| C  | -2.78772800 | 0.79662900  | -2.02584500 |
| H  | -3.69959400 | 0.47786700  | -2.53686800 |
| H  | -2.62264900 | 1.85266100  | -2.25010000 |
| H  | -1.94073600 | 0.23783500  | -2.42602300 |
| C  | -4.00682700 | 1.47634100  | 0.04928900  |

|   |             |             |             |
|---|-------------|-------------|-------------|
| H | -4.97865100 | 1.13242400  | -0.31356000 |
| H | -4.00328300 | 1.43289400  | 1.13962600  |
| H | -3.88777300 | 2.51593600  | -0.26054400 |
| C | -1.51046400 | -2.45669900 | -1.21685300 |
| H | -0.50234300 | -2.86353800 | -1.20999300 |
| H | -2.22446600 | -3.28674200 | -1.21020500 |
| H | -1.63683300 | -1.91084900 | -2.15250800 |
| C | -1.72701100 | -2.36536600 | 1.28432400  |
| H | -1.87483800 | -1.70855700 | 2.14345100  |
| H | -2.52361700 | -3.11748700 | 1.28128300  |
| H | -0.77319600 | -2.87404800 | 1.41205800  |

AlH.neutral

-805.08884901 a.u.

|    |             |             |             |
|----|-------------|-------------|-------------|
| C  | 0.57956400  | -0.28903000 | -0.02735800 |
| Al | 2.00028600  | 1.05832100  | 0.00027600  |
| C  | 3.42252300  | -0.21620500 | -0.04259200 |
| C  | 2.77014100  | -1.43124100 | -0.07595100 |
| C  | 1.35062500  | -1.49582200 | -0.06750600 |
| H  | 0.90078000  | -2.47800200 | -0.10834400 |
| H  | 3.31094100  | -2.37446800 | -0.11163200 |
| H  | 4.50440800  | -0.20590600 | -0.04931300 |
| H  | 1.98596300  | 2.63430500  | 0.05308500  |
| C  | -0.80277300 | -0.29623700 | -0.03266700 |
| C  | -2.99277700 | 0.61483900  | -0.28709800 |
| N  | -1.56683100 | 0.82500400  | -0.00030400 |
| C  | -1.73705500 | -1.51046500 | -0.09257800 |
| C  | -3.14036600 | -0.87797000 | 0.02021700  |
| H  | -3.85940200 | -1.35785900 | -0.64526400 |
| H  | -3.50839200 | -0.99117800 | 1.04173000  |
| C  | -0.99510700 | 2.14090600  | -0.05718000 |
| H  | -0.35359600 | 2.32150100  | 0.80825400  |
| H  | -0.38275000 | 2.27551100  | -0.95711000 |
| H  | -1.78710400 | 2.88550200  | -0.05857100 |
| C  | -3.29340500 | 0.95537600  | -1.74879000 |
| H  | -4.34369100 | 0.76201500  | -1.97293800 |
| H  | -3.09599200 | 2.01084100  | -1.94662700 |
| H  | -2.67819500 | 0.36291900  | -2.42531800 |
| C  | -3.88332800 | 1.44958600  | 0.62910800  |
| H  | -3.84976000 | 2.51186500  | 0.38424400  |
| H  | -4.91836500 | 1.12208400  | 0.51814700  |
| H  | -3.58870500 | 1.31822300  | 1.67083300  |
| C  | -1.58770300 | -2.26211300 | -1.42178800 |
| H  | -0.58515100 | -2.66387100 | -1.55042100 |
| H  | -2.29837800 | -3.09118700 | -1.44989300 |
| H  | -1.79315400 | -1.61205000 | -2.27222300 |
| C  | -1.53812500 | -2.47068200 | 1.08611400  |
| H  | -0.61369300 | -3.03791800 | 1.02255500  |
| H  | -1.53379600 | -1.92207700 | 2.02918700  |

|   |             |             |            |
|---|-------------|-------------|------------|
| H | -2.36777300 | -3.18154500 | 1.10853300 |
|---|-------------|-------------|------------|

AsH2.cation

-2798.90806276 a.u.

|    |             |             |             |
|----|-------------|-------------|-------------|
| C  | 0.20665400  | -0.57575600 | -0.12596100 |
| As | 1.36378300  | 0.89896800  | 0.22855900  |
| C  | 2.89289300  | -0.17531500 | 0.22943400  |
| C  | 2.46839200  | -1.45267600 | -0.03401600 |
| C  | 1.08941400  | -1.68650600 | -0.20752700 |
| H  | 0.73100600  | -2.67560000 | -0.43967100 |
| H  | 3.17566200  | -2.26782500 | -0.11696600 |
| H  | 3.90371200  | 0.16485100  | 0.37349300  |
| H  | 1.39516100  | 2.04664700  | -0.74855000 |
| H  | 1.05029900  | 1.58772700  | 1.53284500  |
| C  | -1.18928000 | -0.61393000 | -0.11822200 |
| C  | -3.44962500 | 0.13131300  | -0.13311300 |
| N  | -1.99714400 | 0.42940800  | -0.27264100 |
| C  | -2.01509000 | -1.88611400 | 0.05851600  |
| C  | -3.40918200 | -1.31054700 | 0.38475500  |
| H  | -4.20239300 | -1.91701300 | -0.05107900 |
| H  | -3.55019300 | -1.30733500 | 1.46664100  |
| C  | -1.56591600 | 1.74851900  | -0.68295500 |
| H  | -1.09676300 | 2.30182500  | 0.13561300  |
| H  | -0.88075500 | 1.67155900  | -1.52828200 |
| H  | -2.43041100 | 2.32383200  | -1.00071100 |
| C  | -4.15255200 | 0.26124700  | -1.48330800 |
| H  | -5.20181700 | -0.00855700 | -1.36363000 |
| H  | -4.12284400 | 1.28428800  | -1.85972500 |
| H  | -3.71461400 | -0.39548800 | -2.23309900 |
| C  | -4.08084500 | 1.07775400  | 0.88221100  |
| H  | -4.11273700 | 2.10586200  | 0.51894900  |
| H  | -5.10869400 | 0.76555400  | 1.06947600  |
| H  | -3.53854700 | 1.05196900  | 1.82809700  |
| C  | -2.03269000 | -2.68176900 | -1.25564900 |
| H  | -1.04723200 | -3.06590700 | -1.51401700 |
| H  | -2.70484200 | -3.53349300 | -1.14355400 |
| H  | -2.38417800 | -2.07879500 | -2.09182300 |
| C  | -1.55015500 | -2.77316600 | 1.21516700  |
| H  | -0.63697400 | -3.32059900 | 0.99610900  |
| H  | -1.39152500 | -2.18696900 | 2.12138200  |
| H  | -2.32984000 | -3.50795900 | 1.42158300  |

AsH.neutral

-2798.55014316 a.u.

|    |            |             |             |
|----|------------|-------------|-------------|
| C  | 0.19337100 | -0.59636900 | -0.06232100 |
| As | 1.37297500 | 0.94318800  | -0.49304000 |
| C  | 2.83190000 | -0.31008200 | -0.55003400 |
| C  | 2.41389900 | -1.54663600 | -0.16610900 |
| C  | 1.03383300 | -1.72495300 | 0.08504100  |

|                    |             |             |             |                    |             |             |             |
|--------------------|-------------|-------------|-------------|--------------------|-------------|-------------|-------------|
| H                  | 0.66804500  | -2.68729400 | 0.40721600  | H                  | -3.56260000 | -1.43220500 | -0.40315000 |
| H                  | 3.10199700  | -2.37608000 | -0.04177200 | H                  | -3.18011600 | -0.80469600 | 1.20383000  |
| H                  | 3.86104200  | -0.03962600 | -0.73070000 | C                  | -0.83528400 | 2.19739900  | -0.32813500 |
| H                  | 1.05074900  | 0.96352300  | -1.99295000 | H                  | 0.04398700  | 2.45490100  | 0.25233000  |
| C                  | -1.18509600 | -0.61910300 | 0.03482300  | H                  | -0.53590300 | 2.19236700  | -1.38452300 |
| C                  | -3.37083500 | 0.14242800  | -0.41971700 | H                  | -1.60170700 | 2.96009100  | -0.17452700 |
| N                  | -2.02907900 | 0.46228300  | 0.09292800  | C                  | -2.82582400 | 0.66219500  | -1.88330900 |
| C                  | -2.04536500 | -1.88887100 | 0.06531000  | H                  | -3.76012900 | 0.20825300  | -2.22265200 |
| C                  | -3.48457200 | -1.33141000 | -0.02374400 | H                  | -2.81374800 | 1.70277900  | -2.21468000 |
| H                  | -4.09604300 | -1.89250000 | -0.73184600 | H                  | -1.98833900 | 0.15340100  | -2.36197900 |
| H                  | -3.96562900 | -1.39417600 | 0.95415000  | C                  | -3.75391900 | 1.48338100  | 0.28656300  |
| C                  | -1.58433300 | 1.83217700  | 0.11798500  | H                  | -4.75224000 | 1.08639000  | 0.08382700  |
| H                  | -0.83276200 | 1.96270800  | 0.89366800  | H                  | -3.60138500 | 1.52097900  | 1.36611300  |
| H                  | -1.15866900 | 2.16571600  | -0.83601500 | H                  | -3.71672800 | 2.50058800  | -0.10707500 |
| H                  | -2.42937000 | 2.47501400  | 0.35587400  | C                  | -1.30986400 | -2.40801700 | -1.08573500 |
| C                  | -3.41561400 | 0.34864200  | -1.93633100 | H                  | -0.28884500 | -2.74785500 | -1.24051000 |
| H                  | -4.38608200 | 0.04842500  | -2.33541100 | H                  | -1.95076000 | -3.28223800 | -0.92719600 |
| H                  | -3.25931500 | 1.40049700  | -2.18454300 | H                  | -1.63481600 | -1.91738500 | -2.00346800 |
| H                  | -2.63834800 | -0.23551100 | -2.43050600 | C                  | -1.16826900 | -2.24081800 | 1.41391700  |
| C                  | -4.45994400 | 0.97202600  | 0.25005700  | H                  | -0.19158600 | -2.72057700 | 1.41687700  |
| H                  | -4.47538400 | 2.00301400  | -0.10522800 | H                  | -1.20740000 | -1.56109400 | 2.26694700  |
| H                  | -5.43224000 | 0.53412000  | 0.01902500  | H                  | -1.93704600 | -3.01062500 | 1.54541600  |
| H                  | -4.32995700 | 0.97090200  | 1.33329700  |                    |             |             |             |
| C                  | -1.76259100 | -2.82271100 | -1.11646100 | BH.neutral         |             |             |             |
| H                  | -0.73767600 | -3.18645400 | -1.11755200 | -587.52452842 a.u. |             |             |             |
| H                  | -2.43266100 | -3.68368800 | -1.06402600 | C                  | 1.82168100  | -0.05838200 | -0.04405200 |
| H                  | -1.93541300 | -2.31828600 | -2.06759700 | B                  | 2.89432200  | 1.08548300  | -0.04348600 |
| C                  | -1.89519100 | -2.64723500 | 1.39102600  | C                  | 4.24333300  | 0.34343800  | -0.03740000 |
| H                  | -0.92536500 | -3.12789300 | 1.49608900  | C                  | 3.97923500  | -1.01485600 | -0.04664000 |
| H                  | -2.03066100 | -1.96736200 | 2.23366800  | C                  | 2.59533400  | -1.27102700 | -0.03504300 |
| H                  | -2.66211100 | -3.42352200 | 1.45151400  | H                  | 2.19939200  | -2.27510800 | -0.06979300 |
|                    |             |             |             | H                  | 4.71882900  | -1.80611500 | -0.06407600 |
| BH2.anion          |             |             |             | H                  | 5.25233800  | 0.73481500  | -0.02733200 |
| -588.14594019 a.u. |             |             |             | H                  | 2.74426900  | 2.26366800  | 0.00380900  |
| C                  | 0.86575600  | -0.21037800 | -0.04946500 | C                  | 0.43731300  | -0.05258000 | 0.01787600  |
| B                  | 1.97770100  | 1.03070000  | -0.04727300 | C                  | -1.79052500 | 0.81132100  | -0.01800600 |
| C                  | 3.33986200  | 0.17826100  | -0.07017100 | N                  | -0.34569100 | 1.01523900  | -0.21529700 |
| C                  | 3.04785800  | -1.15257700 | -0.06483700 | C                  | -0.46578200 | -1.24832700 | 0.33431900  |
| C                  | 1.64332000  | -1.40347100 | -0.04358200 | C                  | -1.82076400 | -0.57613000 | 0.63097200  |
| H                  | 1.26156000  | -2.41704900 | -0.01722900 | H                  | -2.65870500 | -1.17506800 | 0.27176700  |
| H                  | 3.77259000  | -1.96549500 | -0.07164700 | H                  | -1.93456700 | -0.46227700 | 1.71076700  |
| H                  | 4.36921800  | 0.52896400  | -0.08478700 | C                  | 0.14357900  | 2.29080300  | -0.68086000 |
| H                  | 1.89616800  | 1.70855100  | 0.97700100  | H                  | 0.57144000  | 2.87891000  | 0.13250000  |
| H                  | 1.88843800  | 1.78017300  | -1.01216400 | H                  | 0.92293200  | 2.13582000  | -1.42686900 |
| C                  | -0.51094600 | -0.22748800 | 0.00528700  | H                  | -0.67821500 | 2.84727700  | -1.12677500 |
| C                  | -2.70080500 | 0.58220400  | -0.35331400 | C                  | -2.53770200 | 0.85020000  | -1.35296400 |
| N                  | -1.34935100 | 0.91595700  | 0.10121500  | H                  | -3.59972400 | 0.66791000  | -1.18247500 |
| C                  | -1.41901500 | -1.45892200 | 0.11727200  | H                  | -2.44320100 | 1.82398900  | -1.83501300 |
| C                  | -2.83451500 | -0.84942600 | 0.16762000  | H                  | -2.16351400 | 0.09167600  | -2.03874800 |



|                    |             |             |             |                     |             |             |             |
|--------------------|-------------|-------------|-------------|---------------------|-------------|-------------|-------------|
| C                  | -2.35868800 | 1.87511200  | 0.91930200  | H                   | -0.05562900 | -2.84159800 | 1.24021200  |
| H                  | -2.34662100 | 2.86525800  | 0.46124800  | H                   | -0.96843900 | -1.70019100 | 2.22486500  |
| H                  | -3.39441300 | 1.63217700  | 1.16236100  | H                   | -1.78296700 | -3.09368100 | 1.49702200  |
| H                  | -1.78456900 | 1.91225400  | 1.84590200  |                     |             |             |             |
| C                  | -0.56573800 | -2.17193000 | -0.88760100 | CH.anion            |             |             |             |
| H                  | 0.39373900  | -2.62939500 | -1.12135900 | -600.78965017 a.u.  |             |             |             |
| H                  | -1.28576200 | -2.96766700 | -0.68424100 | C                   | 0.85754100  | -0.31494800 | -0.19321600 |
| H                  | -0.89592800 | -1.62983600 | -1.77345400 | C                   | 1.73455000  | 0.74939700  | 0.17026100  |
| C                  | -0.03220800 | -2.04500700 | 1.56698400  | C                   | 3.05340400  | 0.29895400  | 0.06246400  |
| H                  | 0.84619700  | -2.65893800 | 1.38921900  | C                   | 3.02566600  | -1.04381500 | -0.37488800 |
| H                  | 0.18748400  | -1.37579200 | 2.39987000  | C                   | 1.69012300  | -1.42340400 | -0.52836700 |
| H                  | -0.84910100 | -2.70691400 | 1.86458700  | H                   | 1.34521200  | -2.37988500 | -0.89852900 |
|                    |             |             |             | H                   | 3.88878600  | -1.66496000 | -0.57704800 |
| CH2.neutral        |             |             |             | H                   | 3.94109400  | 0.87545200  | 0.28945700  |
| -601.36978960 a.u. |             |             |             | H                   | 1.42020100  | 1.71111900  | 0.55413500  |
| C                  | 0.87220500  | -0.24862800 | -0.07721800 | C                   | -0.57543400 | -0.31173700 | -0.15714500 |
| C                  | 1.80753700  | 0.95770900  | 0.00616500  | C                   | -2.74141200 | 0.60550900  | -0.00447700 |
| C                  | 3.17972800  | 0.35328900  | -0.00751900 | N                   | -1.30916400 | 0.91254900  | -0.11918500 |
| C                  | 3.07531000  | -0.99430200 | -0.08768100 | C                   | -1.41044800 | -1.41043500 | 0.48432200  |
| C                  | 1.70812000  | -1.38689400 | -0.12349800 | C                   | -2.71387700 | -0.66995700 | 0.84556900  |
| H                  | 1.38693200  | -2.41202800 | -0.19005200 | H                   | -3.60764300 | -1.28168500 | 0.69380100  |
| H                  | 3.90481000  | -1.68705900 | -0.12144100 | H                   | -2.68164700 | -0.38165500 | 1.89965500  |
| H                  | 4.08986200  | 0.93206100  | 0.03022000  | C                   | -0.96934600 | 1.88334300  | -1.14008700 |
| H                  | 1.63365100  | 1.52560700  | 0.92660300  | H                   | 0.07863500  | 2.15384800  | -1.05331500 |
| H                  | 1.68282700  | 1.65585700  | -0.82446300 | H                   | -1.12068500 | 1.48372300  | -2.15515100 |
| C                  | -0.50866100 | -0.24646500 | -0.02923300 | H                   | -1.57844500 | 2.78225800  | -1.01701200 |
| C                  | -2.74364000 | 0.52146100  | -0.22728700 | C                   | -3.40617900 | 0.35877100  | -1.36909600 |
| N                  | -1.32835300 | 0.87281200  | -0.00271600 | H                   | -4.39784700 | -0.07909200 | -1.23496300 |
| C                  | -1.37006100 | -1.50071500 | 0.10211700  | H                   | -3.52253000 | 1.29319800  | -1.92280700 |
| C                  | -2.78333900 | -0.91644600 | 0.29014800  | H                   | -2.80060500 | -0.31667400 | -1.97424800 |
| H                  | -3.54569100 | -1.51129700 | -0.21523800 | C                   | -3.48324400 | 1.72815500  | 0.71591900  |
| H                  | -3.02777400 | -0.89668200 | 1.35427800  | H                   | -4.52094200 | 1.43701400  | 0.90223000  |
| C                  | -0.89258800 | 2.15562900  | -0.51274400 | H                   | -2.99690400 | 1.94074100  | 1.66842000  |
| H                  | -0.11434700 | 2.58700500  | 0.10965300  | H                   | -3.49681700 | 2.64436800  | 0.12149100  |
| H                  | -0.52116400 | 2.07983500  | -1.54180200 | C                   | -1.68218400 | -2.59648900 | -0.45408800 |
| H                  | -1.73528200 | 2.84355400  | -0.50233300 | H                   | -0.74136300 | -3.05497500 | -0.75831000 |
| C                  | -3.10700700 | 0.62441400  | -1.71343600 | H                   | -2.28750700 | -3.35640300 | 0.05423800  |
| H                  | -4.10803900 | 0.22609800  | -1.88547600 | H                   | -2.20946700 | -2.28284000 | -1.35536000 |
| H                  | -3.10138500 | 1.66427400  | -2.04498400 | C                   | -0.74522500 | -1.95494200 | 1.75589000  |
| H                  | -2.40106100 | 0.07203700  | -2.33305500 | H                   | 0.18660500  | -2.46398000 | 1.50752400  |
| C                  | -3.67414900 | 1.41367800  | 0.58846600  | H                   | -0.49893900 | -1.13228500 | 2.42963100  |
| H                  | -4.69267100 | 1.02494400  | 0.53042200  | H                   | -1.41309700 | -2.65292900 | 2.27353700  |
| H                  | -3.36472700 | 1.42618200  | 1.63368700  |                     |             |             |             |
| H                  | -3.69588800 | 2.43896200  | 0.21647300  | GaH2.anion          |             |             |             |
| C                  | -1.31256900 | -2.38834400 | -1.14955700 | -2488.14133213 a.u. |             |             |             |
| H                  | -0.30231100 | -2.73877900 | -1.35031900 | C                   | 0.12013200  | -0.58595100 | 0.04555200  |
| H                  | -1.95464800 | -3.26070900 | -1.00533600 | Ga                  | 1.57659500  | 0.90481400  | -0.23844500 |
| H                  | -1.65920900 | -1.85927200 | -2.03602300 | C                   | 2.96519400  | -0.57738400 | -0.20113600 |
| C                  | -1.01266300 | -2.33477200 | 1.33854900  | C                   | 2.30709000  | -1.75201700 | 0.01531000  |



|   |             |             |             |
|---|-------------|-------------|-------------|
| H | -3.67256300 | 1.42880900  | -2.09645300 |
| H | -3.10619400 | -0.20736100 | -2.43445100 |
| C | -4.34764900 | 1.07924500  | 0.52662800  |
| H | -4.35693700 | 2.11645100  | 0.18892400  |
| H | -5.36997100 | 0.70395500  | 0.45336600  |
| H | -4.04181500 | 1.05271800  | 1.57281100  |
| C | -1.96731700 | -2.68653900 | -1.27466500 |
| H | -0.95838100 | -3.06101800 | -1.43121300 |
| H | -2.64247300 | -3.54234100 | -1.20182600 |
| H | -2.24487500 | -2.11341900 | -2.15844500 |
| C | -1.79075800 | -2.71292500 | 1.23327600  |
| H | -0.84043000 | -3.23648700 | 1.16933900  |
| H | -1.77826600 | -2.10136000 | 2.13664900  |
| H | -2.58160800 | -3.46001200 | 1.33626800  |

GeH.anion

-2639.69055653 a.u.

|    |             |             |             |
|----|-------------|-------------|-------------|
| C  | 0.15764600  | -0.58480600 | 0.01171100  |
| Ge | 1.52492300  | 0.93855400  | 0.35001200  |
| C  | 2.87010800  | -0.50919200 | 0.47096500  |
| C  | 2.33689100  | -1.68205400 | 0.00762000  |
| C  | 0.94001900  | -1.74606900 | -0.22963500 |
| H  | 0.52814600  | -2.66232800 | -0.64009700 |
| H  | 2.94209000  | -2.56503000 | -0.20331100 |
| H  | 3.94307600  | -0.42189900 | 0.61463800  |
| H  | 1.20699600  | 1.22859900  | 1.90132700  |
| C  | -1.21811700 | -0.60421400 | -0.01373000 |
| C  | -3.29351000 | 0.19379200  | 0.73634100  |
| N  | -2.08050500 | 0.51400400  | -0.01972200 |
| C  | -2.12991300 | -1.84078400 | -0.02183200 |
| C  | -3.52698300 | -1.24998500 | 0.28285500  |
| H  | -4.13258200 | -1.23260500 | -0.62705600 |
| H  | -4.06825500 | -1.83161100 | 1.03338400  |
| C  | -1.54844600 | 1.84845600  | 0.10264800  |
| H  | -1.05257400 | 2.02989600  | 1.06466700  |
| H  | -0.80906400 | 2.01646800  | -0.67734200 |
| H  | -2.35734500 | 2.57050000  | -0.02297600 |
| C  | -4.46827800 | 1.08322000  | 0.34386400  |
| H  | -5.39446200 | 0.66600300  | 0.74661900  |
| H  | -4.36443500 | 2.09655300  | 0.73563300  |
| H  | -4.54996900 | 1.13363900  | -0.74344600 |
| C  | -3.04983300 | 0.29191100  | 2.24862800  |
| H  | -2.89435200 | 1.33164500  | 2.54459700  |
| H  | -3.90402900 | -0.09783100 | 2.80810000  |
| H  | -2.15513200 | -0.26831700 | 2.52482800  |
| C  | -2.15981000 | -2.50870300 | -1.40307900 |
| H  | -1.20331100 | -2.96437600 | -1.65359200 |
| H  | -2.93093700 | -3.28680100 | -1.43199200 |
| H  | -2.39065800 | -1.76497300 | -2.16805800 |

|   |             |             |            |
|---|-------------|-------------|------------|
| C | -1.76295000 | -2.87309400 | 1.05028500 |
| H | -2.46581700 | -3.71157700 | 1.00858200 |
| H | -0.75329600 | -3.25396100 | 0.91798100 |
| H | -1.81877000 | -2.43263100 | 2.04678600 |

lnH2.anion

-753.33472817 a.u.

|    |             |             |             |
|----|-------------|-------------|-------------|
| C  | 0.63612500  | 0.50901800  | -0.00843300 |
| ln | 2.31828100  | -0.96062100 | 0.50673900  |
| C  | 3.48108500  | 0.91189000  | 0.69769700  |
| C  | 2.64936300  | 1.94853400  | 0.39284800  |
| C  | 1.26404200  | 1.78008200  | 0.05697900  |
| H  | 0.73013800  | 2.69503600  | -0.18870400 |
| H  | 3.00994700  | 2.98075300  | 0.38820600  |
| H  | 4.51214800  | 1.16028600  | 0.93752200  |
| H  | 2.78890200  | -2.08574200 | -0.81928700 |
| H  | 2.00454500  | -1.88886900 | 2.01946600  |
| C  | -0.71349300 | 0.37419300  | -0.19556000 |
| C  | -2.71300400 | -0.83092100 | 0.09871200  |
| N  | -1.37699200 | -0.83293300 | -0.49748400 |
| C  | -1.80931300 | 1.45172800  | -0.12770700 |
| C  | -3.11843000 | 0.62842700  | -0.13508300 |
| H  | -3.83208100 | 0.97765500  | 0.61535300  |
| H  | -3.60049100 | 0.70129600  | -1.11342100 |
| C  | -0.64565100 | -2.07358700 | -0.52352400 |
| H  | 0.19640500  | -1.98380400 | -1.20726700 |
| H  | -0.24807800 | -2.36278300 | 0.45891100  |
| H  | -1.29817100 | -2.86982600 | -0.88495700 |
| C  | -2.65725900 | -1.18302400 | 1.59137000  |
| H  | -3.63379100 | -1.04297200 | 2.06149400  |
| H  | -2.35909500 | -2.22464800 | 1.72835400  |
| H  | -1.92260700 | -0.55912600 | 2.10262100  |
| C  | -3.66536600 | -1.78130000 | -0.61926300 |
| H  | -4.69154000 | -1.58154800 | -0.30135700 |
| H  | -3.59732800 | -1.63219100 | -1.69832300 |
| H  | -3.44748000 | -2.82684600 | -0.39469200 |
| C  | -1.73498200 | 2.29906100  | 1.14702600  |
| H  | -0.78944800 | 2.83035700  | 1.22590900  |
| H  | -2.55067500 | 3.02926200  | 1.15224600  |
| H  | -1.83416200 | 1.67349700  | 2.03520400  |
| C  | -1.77965700 | 2.35987600  | -1.36374700 |
| H  | -2.65784700 | 3.01492600  | -1.37297900 |
| H  | -0.88702800 | 2.98259800  | -1.38878300 |
| H  | -1.79292900 | 1.75208000  | -2.27035100 |

lnH.neutral

-752.70390120 a.u.

|    |             |             |             |
|----|-------------|-------------|-------------|
| C  | -0.18171900 | -0.74278400 | -0.04032100 |
| ln | 1.34478300  | 0.83934000  | -0.02507500 |

|                    |             |             |             |                    |             |             |             |
|--------------------|-------------|-------------|-------------|--------------------|-------------|-------------|-------------|
| C                  | 2.76040200  | -0.74585800 | -0.07668400 | N                  | -1.36132200 | 0.74878500  | -0.19629400 |
| C                  | 2.02724800  | -1.90427600 | -0.09320000 | C                  | -1.32284900 | -1.59424200 | 0.09066100  |
| C                  | 0.60209500  | -1.92888900 | -0.07527200 | C                  | -2.73348000 | -1.04999100 | 0.39753700  |
| H                  | 0.14978200  | -2.91062700 | -0.10167400 | H                  | -3.50760400 | -1.67832700 | -0.04177600 |
| H                  | 2.52346300  | -2.87237000 | -0.12302500 | H                  | -2.88514800 | -1.04333000 | 1.47807600  |
| H                  | 3.84057600  | -0.79905800 | -0.09150000 | C                  | -0.98110200 | 2.04703100  | -0.71476000 |
| H                  | 1.28354700  | 2.56383900  | 0.02338100  | H                  | -0.41212000 | 2.63969800  | 0.00558800  |
| C                  | -1.56274000 | -0.76809600 | -0.04350300 | H                  | -0.42390900 | 1.94602300  | -1.65169500 |
| C                  | -3.77139900 | 0.09181900  | -0.32129300 | H                  | -1.87803600 | 2.61801300  | -0.93432000 |
| N                  | -2.35838900 | 0.33898100  | 0.00025300  | C                  | -3.45006300 | 0.47798700  | -1.51225300 |
| C                  | -2.47379700 | -2.00365600 | -0.10511800 | H                  | -4.48422600 | 0.13997000  | -1.44662800 |
| C                  | -3.89034900 | -1.40082700 | -0.00710100 | H                  | -3.46964100 | 1.50275700  | -1.88465700 |
| H                  | -4.59438300 | -1.89944100 | -0.67502300 | H                  | -2.93417100 | -0.14356100 | -2.24240300 |
| H                  | -4.26395600 | -1.51474400 | 1.01239900  | C                  | -3.53246400 | 1.30611400  | 0.84737200  |
| C                  | -1.83621200 | 1.67471500  | -0.05521200 | H                  | -3.58555700 | 2.33262200  | 0.48149300  |
| H                  | -1.19976500 | 1.87985000  | 0.80848600  | H                  | -4.55658800 | 0.95458900  | 0.97727000  |
| H                  | -1.24001500 | 1.84302300  | -0.96110900 | H                  | -3.04256500 | 1.30232600  | 1.82135800  |
| H                  | -2.65754300 | 2.38677300  | -0.04580200 | C                  | -1.29159400 | -2.40047900 | -1.21560700 |
| C                  | -4.04377700 | 0.41582000  | -1.79264500 | H                  | -0.28539900 | -2.75111400 | -1.44396600 |
| H                  | -5.08073200 | 0.18757900  | -2.04459700 | H                  | -1.93601200 | -3.27461000 | -1.11285400 |
| H                  | -3.87542600 | 1.47645100  | -1.99025300 | H                  | -1.64191900 | -1.81740100 | -2.06585300 |
| H                  | -3.39107200 | -0.15852900 | -2.44937800 | C                  | -0.85232300 | -2.46744000 | 1.25584600  |
| C                  | -4.70885100 | 0.90685600  | 0.56576000  | H                  | 0.08608200  | -2.97809500 | 1.05279100  |
| H                  | -4.70889900 | 1.96678900  | 0.30870300  | H                  | -0.73529100 | -1.87881400 | 2.16674700  |
| H                  | -5.72914100 | 0.54141900  | 0.43749400  | H                  | -1.60579100 | -3.23378900 | 1.44371000  |
| H                  | -4.43186000 | 0.79774000  | 1.61489000  |                    |             |             |             |
| C                  | -2.30404600 | -2.76416200 | -1.42697500 | NH.neutral         |             |             |             |
| H                  | -1.29340900 | -3.14619800 | -1.55049500 | -617.43488240 a.u. |             |             |             |
| H                  | -2.99731400 | -3.60818500 | -1.44930100 | C                  | 0.85193400  | -0.33597300 | -0.11238700 |
| H                  | -2.52132400 | -2.12666900 | -2.28388200 | N                  | 1.58938100  | 0.82112400  | 0.05725100  |
| C                  | -2.26759100 | -2.95141500 | 1.08309100  | C                  | 2.93044300  | 0.54259800  | 0.01710100  |
| H                  | -1.33318100 | -3.50338700 | 1.03263200  | C                  | 3.07306700  | -0.80132900 | -0.21414500 |
| H                  | -2.28070100 | -2.39458500 | 2.02128900  | C                  | 1.77856500  | -1.36231000 | -0.29666000 |
| H                  | -3.08518900 | -3.67631600 | 1.10486300  | H                  | 1.53684800  | -2.38996900 | -0.50969700 |
|                    |             |             |             | H                  | 4.00910700  | -1.32191700 | -0.32857700 |
| NH2.cation         |             |             |             | H                  | 3.66522700  | 1.31889300  | 0.14292200  |
| -617.78797580 a.u. |             |             |             | H                  | 1.18564100  | 1.68094900  | 0.38595900  |
| C                  | 0.85282200  | -0.27523400 | -0.07505600 | C                  | -0.56529200 | -0.35175300 | -0.06685400 |
| N                  | 1.63431300  | 0.99705200  | 0.09466400  | C                  | -2.74206300 | 0.56637900  | 0.09928400  |
| C                  | 3.05823500  | 0.59510100  | 0.12830100  | N                  | -1.31683800 | 0.81705300  | -0.21281400 |
| C                  | 3.11084400  | -0.74759100 | -0.00766200 | C                  | -1.40518700 | -1.49286100 | 0.45687200  |
| C                  | 1.81602800  | -1.29550600 | -0.12605100 | C                  | -2.67621000 | -0.74081900 | 0.90335500  |
| H                  | 1.60200500  | -2.33746200 | -0.27737800 | H                  | -3.57910900 | -1.34023400 | 0.77502000  |
| H                  | 4.02729300  | -1.31611000 | -0.03169600 | H                  | -2.58580600 | -0.49898600 | 1.96468400  |
| H                  | 3.80184400  | 1.36516300  | 0.22658800  | C                  | -1.05101800 | 1.69435500  | -1.34079100 |
| H                  | 1.46543200  | 1.66606900  | -0.66015100 | H                  | 0.00557900  | 1.94117700  | -1.39586000 |
| H                  | 1.36386900  | 1.45682100  | 0.96852500  | H                  | -1.32835900 | 1.22928000  | -2.29447900 |
| C                  | -0.52922800 | -0.30313200 | -0.06808300 | H                  | -1.61411400 | 2.62089200  | -1.22460800 |
| C                  | -2.80626600 | 0.38738100  | -0.12832900 | C                  | -3.29711200 | 1.71162800  | 0.94100800  |



|                    |             |             |             |                    |             |             |             |
|--------------------|-------------|-------------|-------------|--------------------|-------------|-------------|-------------|
| C                  | 3.12723200  | 0.08247000  | -0.57779500 | N                  | -2.32857800 | 0.24658300  | -0.26862800 |
| C                  | 2.82455900  | -1.20325000 | -0.23404200 | C                  | -2.37473400 | -2.07110800 | 0.04564000  |
| C                  | 1.46349500  | -1.45929900 | 0.03256000  | C                  | -3.76060600 | -1.47981300 | 0.37835600  |
| H                  | 1.12994600  | -2.43962400 | 0.33262300  | H                  | -4.56252900 | -2.07248600 | -0.06065400 |
| H                  | 3.57229900  | -1.98330700 | -0.15075000 | H                  | -3.89996300 | -1.48304300 | 1.46050600  |
| H                  | 4.12285800  | 0.45299800  | -0.76859800 | C                  | -1.88139000 | 1.56831900  | -0.64234300 |
| H                  | 1.34234000  | 1.31327300  | -1.78315100 | H                  | -1.42943000 | 2.10443800  | 0.19956500  |
| C                  | -0.77428300 | -0.37300600 | 0.03000100  | H                  | -1.17769600 | 1.50810100  | -1.47436000 |
| C                  | -2.96473000 | 0.39218100  | -0.38508600 | H                  | -2.73416500 | 2.15760700  | -0.96710600 |
| N                  | -1.62340900 | 0.69969700  | 0.13549600  | C                  | -4.48880300 | 0.11709600  | -1.47451600 |
| C                  | -1.62259700 | -1.64839800 | 0.01159600  | H                  | -5.54234200 | -0.13515000 | -1.35384300 |
| C                  | -3.06650600 | -1.09890600 | -0.05347700 | H                  | -4.44193700 | 1.14214400  | -1.84398400 |
| H                  | -3.67331200 | -1.63333300 | -0.78577200 | H                  | -4.06412700 | -0.54184900 | -2.22995800 |
| H                  | -3.54730200 | -1.20849700 | 0.92041300  | C                  | -4.40100200 | 0.91097700  | 0.89796300  |
| C                  | -1.18916600 | 2.07059400  | 0.23555800  | H                  | -4.42526700 | 1.94236800  | 0.54339600  |
| H                  | -0.42305000 | 2.15878100  | 1.00236200  | H                  | -5.43080900 | 0.60703800  | 1.08802700  |
| H                  | -0.78272100 | 2.46509600  | -0.70287300 | H                  | -3.85441700 | 0.87225200  | 1.84102900  |
| H                  | -2.03491000 | 2.68951100  | 0.52844200  | C                  | -2.40669800 | -2.85443700 | -1.27569800 |
| C                  | -3.01684700 | 0.66251800  | -1.89142700 | H                  | -1.42849000 | -3.25356400 | -1.53868400 |
| H                  | -3.98766300 | 0.37525000  | -2.29915500 | H                  | -3.09387800 | -3.69516800 | -1.17152000 |
| H                  | -2.86576500 | 1.72457500  | -2.09554300 | H                  | -2.74771100 | -2.23710300 | -2.10574400 |
| H                  | -2.23949400 | 0.10250500  | -2.41273000 | C                  | -1.92372900 | -2.97591000 | 1.19395100  |
| C                  | -4.05685400 | 1.18494900  | 0.32306400  | H                  | -1.01846500 | -3.53464100 | 0.97080600  |
| H                  | -4.07832100 | 2.23050300  | 0.01352000  | H                  | -1.75721600 | -2.40024700 | 2.10550600  |
| H                  | -5.02723000 | 0.75217000  | 0.07503000  | H                  | -2.71442800 | -3.70090700 | 1.39331200  |
| H                  | -3.92436200 | 1.13699000  | 1.40496500  |                    |             |             |             |
| C                  | -1.33183900 | -2.53297300 | -1.20545200 | SbH.neutral        |             |             |             |
| H                  | -0.30317400 | -2.88626600 | -1.21923200 | -802.82119646 a.u. |             |             |             |
| H                  | -1.99344000 | -3.40185400 | -1.18720300 | C                  | -0.16448600 | -0.78388700 | -0.16785800 |
| H                  | -1.50898000 | -1.99335000 | -2.13635200 | Sb                 | 1.18759100  | 0.91877100  | -0.34643900 |
| C                  | -1.46217500 | -2.45738600 | 1.30583300  | C                  | 2.61566700  | -0.59905900 | -0.67713200 |
| H                  | -0.48587700 | -2.92927700 | 1.38929200  | C                  | 2.03842900  | -1.82244100 | -0.52020300 |
| H                  | -1.60443400 | -1.81375300 | 2.17535000  | C                  | 0.64713400  | -1.94013500 | -0.27676500 |
| H                  | -2.21911000 | -3.24516400 | 1.33578700  | H                  | 0.23916900  | -2.93172100 | -0.14992900 |
|                    |             |             |             | H                  | 2.62999600  | -2.73247000 | -0.57175100 |
| SbH2.cation        |             |             |             | H                  | 3.67726300  | -0.46859600 | -0.82831600 |
| -803.16665404 a.u. |             |             |             | H                  | 0.80120400  | 1.22094400  | -1.99999800 |
| C                  | -0.13455700 | -0.78125900 | -0.12652900 | C                  | -1.54057400 | -0.82098400 | -0.06298400 |
| Sb                 | 1.17480200  | 0.80003600  | 0.26182600  | C                  | -3.72576000 | 0.03898700  | -0.32233700 |
| C                  | 2.70623200  | -0.55606800 | 0.21235200  | N                  | -2.37214000 | 0.23596000  | 0.22042800  |
| C                  | 2.12541700  | -1.76678700 | -0.06222300 | C                  | -2.42176700 | -2.06150700 | -0.27540400 |
| C                  | 0.72650800  | -1.90497500 | -0.21861100 | C                  | -3.85369100 | -1.48190300 | -0.22258800 |
| H                  | 0.33023000  | -2.87833000 | -0.45989400 | H                  | -4.48655600 | -1.88602200 | -1.01394800 |
| H                  | 2.74782400  | -2.64720000 | -0.17227900 | H                  | -4.31729900 | -1.73070900 | 0.73391300  |
| H                  | 3.75889800  | -0.36483200 | 0.33061100  | C                  | -1.90208800 | 1.57122500  | 0.47422900  |
| H                  | 0.88332800  | 1.57129700  | 1.73015500  | H                  | -1.14616400 | 1.55628100  | 1.25761200  |
| H                  | 1.25954100  | 2.09088400  | -0.81702200 | H                  | -1.47844400 | 2.05514500  | -0.41581600 |
| C                  | -1.52939600 | -0.80858400 | -0.12030900 | H                  | -2.73193700 | 2.18217200  | 0.82328600  |
| C                  | -3.78330000 | -0.03358700 | -0.12786900 | C                  | -4.79205700 | 0.73141100  | 0.51850300  |

|                     |             |             |             |                    |             |             |             |
|---------------------|-------------|-------------|-------------|--------------------|-------------|-------------|-------------|
| H                   | -4.79722000 | 1.81278100  | 0.37650800  | C                  | -1.56771600 | -2.87144100 | 1.14170400  |
| H                   | -5.77449700 | 0.36074500  | 0.22190500  | H                  | -0.65769400 | -3.43149600 | 0.94064100  |
| H                   | -4.64585900 | 0.51218900  | 1.57715900  | H                  | -1.41200600 | -2.28971300 | 2.05120700  |
| C                   | -3.79119600 | 0.54241500  | -1.76695800 | H                  | -2.36845800 | -3.59208100 | 1.32444300  |
| H                   | -4.76920200 | 0.32974000  | -2.20211200 |                    |             |             |             |
| H                   | -3.63350600 | 1.62233500  | -1.80487200 | SiH2.neutral       |             |             |             |
| H                   | -3.02454000 | 0.06670000  | -2.37959800 | -852.75629864 a.u. |             |             |             |
| C                   | -2.17302300 | -2.73622000 | -1.62901000 | C                  | 0.60603500  | -0.32244200 | -0.06372300 |
| H                   | -1.15456000 | -3.10477100 | -1.72568600 | Si                 | 1.86555600  | 1.08118500  | 0.09205600  |
| H                   | -2.85636200 | -3.58101900 | -1.74089200 | C                  | 3.31744700  | -0.05236500 | 0.08710600  |
| H                   | -2.35348300 | -2.04542200 | -2.45304300 | C                  | 2.82366200  | -1.32515700 | -0.01806200 |
| C                   | -2.26679900 | -3.07785600 | 0.86427600  | C                  | 1.41636500  | -1.49843300 | -0.08599700 |
| H                   | -1.30888900 | -3.59203200 | 0.84898300  | H                  | 1.01442200  | -2.49599200 | -0.17184000 |
| H                   | -2.37146900 | -2.58230700 | 1.83076100  | H                  | 3.46632000  | -2.19960600 | -0.05196200 |
| H                   | -3.05258300 | -3.83289100 | 0.78097500  | H                  | 4.37703400  | 0.14972100  | 0.14069700  |
|                     |             |             |             | H                  | 1.86340200  | 2.07268700  | -1.01040200 |
| Se.neutral          |             |             |             | H                  | 1.70480200  | 1.86201000  | 1.34544700  |
| -2963.65726630 a.u. |             |             |             | C                  | -0.77310300 | -0.34018200 | -0.05506400 |
| C                   | 0.24656000  | -0.63046200 | 0.00543100  | C                  | -3.00017500 | 0.47238100  | -0.30142100 |
| Se                  | 1.20840200  | 0.96309700  | 0.46238500  | N                  | -1.57719400 | 0.76685400  | -0.07580400 |
| C                   | 2.75592700  | -0.07484000 | 0.56132500  | C                  | -1.66285400 | -1.58519900 | 0.00023900  |
| C                   | 2.49491700  | -1.38189400 | 0.28167000  | C                  | -3.07736400 | -0.98863600 | 0.14662400  |
| C                   | 1.15704300  | -1.69718500 | -0.01899900 | H                  | -3.81944100 | -1.54951300 | -0.42342200 |
| H                   | 0.86043400  | -2.69327000 | -0.30891800 | H                  | -3.37455600 | -1.01725300 | 1.19679800  |
| H                   | 3.27675200  | -2.13024700 | 0.26913300  | C                  | -1.07346200 | 2.07949700  | -0.40242100 |
| H                   | 3.70950500  | 0.37636500  | 0.77793800  | H                  | -0.38078700 | 2.43657400  | 0.35965900  |
| C                   | -1.13514800 | -0.69849200 | -0.15720000 | H                  | -0.56554000 | 2.08261700  | -1.37145600 |
| C                   | -3.39792500 | 0.05242600  | -0.30422900 | H                  | -1.90158400 | 2.78320500  | -0.43950000 |
| N                   | -1.96692200 | 0.35105200  | -0.45106800 | C                  | -3.36638800 | 0.66393200  | -1.77660900 |
| C                   | -1.97204700 | -1.96178300 | -0.01961200 | H                  | -4.40403000 | 0.37282100  | -1.94712700 |
| C                   | -3.36634500 | -1.36914900 | 0.27474000  | H                  | -3.26096100 | 1.71023300  | -2.06946900 |
| H                   | -4.16507600 | -1.99188600 | -0.13120600 | H                  | -2.72658300 | 0.06690800  | -2.42532100 |
| H                   | -3.50321000 | -1.31664400 | 1.35679700  | C                  | -3.89700400 | 1.35275600  | 0.56498000  |
| C                   | -1.53901300 | 1.63693200  | -0.94381900 | H                  | -3.89848400 | 2.39247800  | 0.23496300  |
| H                   | -1.26372300 | 2.33060100  | -0.14303800 | H                  | -4.92490000 | 0.99048700  | 0.50561200  |
| H                   | -0.68260300 | 1.51736100  | -1.60666100 | H                  | -3.57468900 | 1.31480900  | 1.60583400  |
| H                   | -2.34900800 | 2.09119000  | -1.51266900 | C                  | -1.55849800 | -2.41440400 | -1.28745800 |
| C                   | -4.13222500 | 0.10803800  | -1.64758300 | H                  | -0.55159300 | -2.79272600 | -1.44851800 |
| H                   | -5.17353400 | -0.18401700 | -1.50383500 | H                  | -2.23862400 | -3.26691900 | -1.22339100 |
| H                   | -4.13231500 | 1.11469600  | -2.06714000 | H                  | -1.83298000 | -1.82969600 | -2.16460000 |
| H                   | -3.68340800 | -0.56674900 | -2.37472800 | C                  | -1.37369700 | -2.46839600 | 1.21929900  |
| C                   | -4.04673500 | 1.03756500  | 0.66760300  | H                  | -0.42918900 | -3.00063900 | 1.14326100  |
| H                   | -4.04867800 | 2.05092900  | 0.26102500  | H                  | -1.34881800 | -1.86624600 | 2.12868000  |
| H                   | -5.08274600 | 0.75065400  | 0.85710500  | H                  | -2.17104600 | -3.20875700 | 1.32023900  |
| H                   | -3.50738900 | 1.04414500  | 1.61556400  |                    |             |             |             |
| C                   | -1.96620400 | -2.76351100 | -1.32907000 | SiH.anion          |             |             |             |
| H                   | -0.96984500 | -3.15321900 | -1.53930200 | -852.15892506 a.u. |             |             |             |
| H                   | -2.65453000 | -3.60926400 | -1.25555400 | C                  | 0.61921800  | -0.32740800 | 0.03473100  |
| H                   | -2.26478700 | -2.14850300 | -2.17732900 | Si                 | 1.92073900  | 1.10498800  | 0.13257600  |

|   |             |             |             |
|---|-------------|-------------|-------------|
| C | 3.30735900  | -0.10054200 | -0.05534400 |
| C | 2.80067300  | -1.36952100 | 0.14820000  |
| C | 1.39981000  | -1.51388200 | 0.19905500  |
| H | 0.97906000  | -2.48778900 | 0.41554100  |
| H | 3.43257700  | -2.24476400 | 0.29927400  |
| H | 4.37772700  | 0.07326500  | -0.05669800 |
| H | 1.81793000  | 1.90750000  | -1.14413500 |
| C | -0.76215200 | -0.34097900 | -0.01624800 |
| C | -2.87625600 | 0.45302900  | -0.68268800 |
| N | -1.61447200 | 0.79112200  | -0.01592600 |
| C | -1.66985200 | -1.57598600 | 0.00543000  |
| C | -3.08096100 | -0.98054000 | -0.19028900 |
| H | -3.69029100 | -1.56978200 | -0.88046200 |
| H | -3.60417500 | -0.94254700 | 0.76869200  |
| C | -1.06121300 | 2.09085100  | -0.31111300 |
| H | -0.31710300 | 2.35442300  | 0.43945000  |
| H | -0.57080300 | 2.12614100  | -1.29201900 |
| H | -1.85600700 | 2.83767400  | -0.27858900 |
| C | -2.74560100 | 0.52958700  | -2.21082200 |
| H | -3.62513600 | 0.10262800  | -2.69880700 |
| H | -2.64736200 | 1.56786100  | -2.53545300 |
| H | -1.85714000 | -0.00850800 | -2.54407100 |
| C | -4.02211400 | 1.34886300  | -0.22205200 |
| H | -4.97339400 | 0.93446900  | -0.56549800 |
| H | -4.03452100 | 1.40327700  | 0.86761600  |
| H | -3.93982400 | 2.36076600  | -0.62260800 |
| C | -1.62072100 | -2.29294400 | 1.36235600  |
| H | -2.39492200 | -3.06703700 | 1.40802600  |
| H | -0.65474900 | -2.75942300 | 1.54385500  |
| H | -1.80125300 | -1.57485500 | 2.16435900  |
| C | -1.36777500 | -2.57160800 | -1.12324700 |
| H | -0.33384800 | -2.90683800 | -1.09950700 |
| H | -2.02520300 | -3.44275800 | -1.03275800 |
| H | -1.54412100 | -2.11787300 | -2.09925800 |

S.neutral

-960.27358557 a.u.

|   |             |             |             |
|---|-------------|-------------|-------------|
| C | 0.65896000  | -0.36322900 | -0.03691100 |
| S | 1.63885700  | 1.08591200  | 0.15910600  |
| C | 3.11177700  | 0.20500600  | 0.13065400  |
| C | 2.88796800  | -1.13360700 | -0.01374200 |
| C | 1.52854400  | -1.46816800 | -0.10372200 |
| H | 1.18952200  | -2.48116300 | -0.23570500 |
| H | 3.68409300  | -1.86298900 | -0.06322700 |
| H | 4.05188100  | 0.72495400  | 0.20675400  |
| C | -0.74098000 | -0.38706300 | -0.05023100 |
| C | -2.98466600 | 0.32776200  | -0.28223100 |
| N | -1.57743800 | 0.71348900  | -0.06629500 |
| C | -1.56644500 | -1.66210200 | 0.08242300  |

|   |             |             |             |
|---|-------------|-------------|-------------|
| C | -2.99221500 | -1.10257000 | 0.25918100  |
| H | -3.74066400 | -1.72250100 | -0.23646800 |
| H | -3.23628400 | -1.07081700 | 1.32300000  |
| C | -1.15716500 | 2.00685500  | -0.56698000 |
| H | -0.50082100 | 2.51445000  | 0.13701400  |
| H | -0.64146300 | 1.92025600  | -1.52914000 |
| H | -2.03498300 | 2.63483100  | -0.69958200 |
| C | -3.35179600 | 0.39881400  | -1.76909800 |
| H | -4.34488500 | -0.02263800 | -1.93185400 |
| H | -3.36856800 | 1.43246300  | -2.11855500 |
| H | -2.63592000 | -0.14903000 | -2.38073100 |
| C | -3.93016900 | 1.21486500  | 0.52149200  |
| H | -3.96244700 | 2.23578200  | 0.13849400  |
| H | -4.94323900 | 0.81220200  | 0.46377400  |
| H | -3.62482100 | 1.24301600  | 1.56755300  |
| C | -1.48726900 | -2.55809900 | -1.16341700 |
| H | -0.47117900 | -2.89553600 | -1.35751800 |
| H | -2.11461000 | -3.44052200 | -1.01546200 |
| H | -1.83779800 | -2.04188600 | -2.05553900 |
| C | -1.19768200 | -2.48295000 | 1.32453800  |
| H | -0.22944900 | -2.97004600 | 1.23257100  |
| H | -1.17084300 | -1.84429400 | 2.20847200  |
| H | -1.95180400 | -3.25800800 | 1.48160600  |

SnH2.neutral

-777.47204375 a.u.

|    |             |             |             |
|----|-------------|-------------|-------------|
| C  | -0.15446000 | -0.78342500 | -0.09952700 |
| Sn | 1.24172900  | 0.82295800  | 0.30497600  |
| C  | 2.71143500  | -0.69469200 | 0.36079600  |
| C  | 2.06864100  | -1.87003700 | 0.10141000  |
| C  | 0.65940700  | -1.94448200 | -0.11237800 |
| H  | 0.24733600  | -2.91941600 | -0.33297700 |
| H  | 2.62461600  | -2.80270100 | 0.04578600  |
| H  | 3.77995700  | -0.65674000 | 0.51177700  |
| H  | 1.42175800  | 2.03256200  | -0.91243700 |
| H  | 0.91161100  | 1.65502500  | 1.78078800  |
| C  | -1.53098100 | -0.80412000 | -0.17492900 |
| C  | -3.76892200 | 0.04428200  | -0.33998100 |
| N  | -2.32245800 | 0.29384700  | -0.36033500 |
| C  | -2.43828300 | -2.03278100 | -0.08249000 |
| C  | -3.82462000 | -1.40316700 | 0.16181500  |
| H  | -4.62018700 | -1.97112000 | -0.32296600 |
| H  | -4.02809700 | -1.39829600 | 1.23455200  |
| C  | -1.81018900 | 1.59340800  | -0.70683000 |
| H  | -1.35338800 | 2.10330100  | 0.14859000  |
| H  | -1.06908800 | 1.51380000  | -1.50491400 |
| H  | -2.62495900 | 2.22244500  | -1.05890200 |
| C  | -4.38099200 | 0.20393400  | -1.73479500 |
| H  | -5.44807900 | -0.02074400 | -1.69741200 |



|   |             |             |             |
|---|-------------|-------------|-------------|
| H | -4.27219100 | 1.22602500  | -2.10107100 |
| H | -3.91235900 | -0.46679200 | -2.45312300 |
| C | -4.47015500 | 0.99114700  | 0.63318400  |
| H | -4.44329500 | 2.02426700  | 0.28231500  |
| H | -5.51797700 | 0.70361500  | 0.73667800  |
| H | -3.99828000 | 0.94379900  | 1.61524100  |
| C | -2.41219800 | -2.81855200 | -1.40086000 |
| H | -1.42528900 | -3.23680200 | -1.59314300 |
| H | -3.12964800 | -3.64126600 | -1.35364300 |
| H | -2.67164800 | -2.18651200 | -2.24960000 |
| C | -2.11222200 | -2.96383700 | 1.08808200  |
| H | -1.21220700 | -3.55095500 | 0.92654400  |
| H | -1.98136400 | -2.39257000 | 2.00818900  |
| H | -2.94373100 | -3.65852600 | 1.23037700  |

SnH.anion

-776.91585307 a.u.

|    |             |             |             |
|----|-------------|-------------|-------------|
| C  | 1.51048600  | 0.18950400  | 0.24662000  |
| Sn | 3.04378400  | 1.83400300  | -0.24832300 |
| C  | 4.34874500  | 0.06623100  | -0.25586400 |
| C  | 3.68161300  | -1.01554000 | 0.24244800  |
| C  | 2.27872400  | -0.97962800 | 0.48748700  |
| H  | 1.83651400  | -1.87815800 | 0.90953200  |
| H  | 4.19549000  | -1.95111200 | 0.47653500  |
| H  | 5.42540400  | -0.01079300 | -0.38794600 |
| H  | 2.63470700  | 1.89915900  | -2.01483000 |
| C  | 0.13956100  | 0.16430400  | 0.25168100  |
| C  | -1.91197200 | 0.99057800  | -0.53908600 |
| N  | -0.71747300 | 1.28501900  | 0.25558500  |
| C  | -0.78225700 | -1.06738800 | 0.21117200  |
| C  | -2.16567900 | -0.46218000 | -0.12609300 |
| H  | -2.68319800 | -1.02320000 | -0.90814400 |
| H  | -2.80176600 | -0.46378800 | 0.76288900  |
| C  | -0.17157300 | 2.61520100  | 0.18087000  |
| H  | 0.54943700  | 2.75587900  | 0.98340400  |
| H  | 0.34426100  | 2.81952500  | -0.76725000 |
| H  | -0.97487300 | 3.34309300  | 0.30675700  |
| C  | -3.09076900 | 1.87896800  | -0.15675300 |
| H  | -2.96852000 | 2.90098600  | -0.51954400 |
| H  | -4.00802500 | 1.47970000  | -0.59623900 |
| H  | -3.20357000 | 1.90238700  | 0.92868000  |
| C  | -1.62617400 | 1.12198600  | -2.04113300 |
| H  | -2.46976500 | 0.75563800  | -2.63150500 |
| H  | -1.45144500 | 2.16632300  | -2.30849300 |
| H  | -0.73025900 | 0.55946000  | -2.30864200 |
| C  | -0.38614000 | -2.08228300 | -0.86636700 |
| H  | 0.60964100  | -2.48537800 | -0.69867600 |
| H  | -1.10444600 | -2.90843900 | -0.87372400 |
| H  | -0.38913500 | -1.61934900 | -1.85413400 |

|   |             |             |            |
|---|-------------|-------------|------------|
| C | -0.85962900 | -1.75731500 | 1.57939900 |
| H | -1.63942600 | -2.52699700 | 1.57109300 |
| H | 0.08305400  | -2.22936900 | 1.85112100 |
| H | -1.10638500 | -1.02473000 | 2.35016400 |

Te.neutral

-830.01142185 a.u.

|    |             |             |             |
|----|-------------|-------------|-------------|
| C  | -0.10052900 | -0.83541200 | -0.01239800 |
| Te | 1.00367300  | 0.87392400  | 0.56756600  |
| C  | 2.56450900  | -0.46207900 | 0.62331900  |
| C  | 2.14744400  | -1.71053600 | 0.27305000  |
| C  | 0.79195100  | -1.91905100 | -0.05388600 |
| H  | 0.46366300  | -2.89162300 | -0.39121700 |
| H  | 2.85073800  | -2.53417400 | 0.22130400  |
| H  | 3.57730500  | -0.17364900 | 0.85282900  |
| C  | -1.47801800 | -0.90319000 | -0.17524500 |
| C  | -3.74289700 | -0.14456100 | -0.30020200 |
| N  | -2.31150800 | 0.14758100  | -0.45679800 |
| C  | -2.32280700 | -2.16617900 | -0.05033700 |
| C  | -3.71259700 | -1.57272000 | 0.26113100  |
| H  | -4.51625600 | -2.18791700 | -0.14653100 |
| H  | -3.84143500 | -1.53279500 | 1.34469400  |
| C  | -1.88281900 | 1.44300800  | -0.91867400 |
| H  | -1.62524500 | 2.12596700  | -0.10136200 |
| H  | -1.01738600 | 1.33885800  | -1.57250900 |
| H  | -2.68609100 | 1.90639500  | -1.49001800 |
| C  | -1.91674800 | -3.09517700 | 1.09461600  |
| H  | -1.01263100 | -3.65920800 | 0.87955400  |
| H  | -1.74992100 | -2.52769600 | 2.01115500  |
| H  | -2.72246200 | -3.81147700 | 1.27279800  |
| C  | -2.32935300 | -2.94495100 | -1.37322500 |
| H  | -1.33885700 | -3.34260000 | -1.59494300 |
| H  | -3.02693700 | -3.78396600 | -1.31086000 |
| H  | -2.62468400 | -2.31227100 | -2.20957400 |
| C  | -4.37707200 | 0.83170600  | 0.69021900  |
| H  | -4.38146000 | 1.84976200  | 0.29551700  |
| H  | -5.41151700 | 0.54511500  | 0.88832800  |
| H  | -3.82711700 | 0.82581300  | 1.63218600  |
| C  | -4.48856500 | -0.06717100 | -1.63600000 |
| H  | -5.53222600 | -0.34703700 | -1.48521300 |
| H  | -4.47930900 | 0.94344900  | -2.04603800 |
| H  | -4.05559300 | -0.74096100 | -2.37361100 |

CAAC.neutra

-408.44835912 a.u.

|   |             |             |             |
|---|-------------|-------------|-------------|
| C | -1.24218900 | -0.00349800 | -0.08633000 |
| N | -0.71546300 | -0.44781100 | 1.21733600  |
| C | 0.61657600  | -0.08535600 | 1.30779700  |
| C | 1.24043700  | -0.02048900 | -0.05919000 |

|                    |             |             |             |                    |             |             |             |
|--------------------|-------------|-------------|-------------|--------------------|-------------|-------------|-------------|
| C                  | 0.00181500  | -0.17670900 | -0.97764200 | H                  | -3.01011500 | -1.45451000 | -1.51436200 |
| H                  | 0.00424800  | 0.53713500  | -1.80303600 | H                  | -1.49219800 | -1.98764500 | -2.24983200 |
| H                  | -0.01017500 | -1.18079500 | -1.40687700 | C                  | -2.35474000 | -2.01856000 | 1.12852600  |
| C                  | -1.70157000 | 1.45695600  | -0.02668000 | H                  | -3.20550300 | -1.33918300 | 1.04966800  |
| H                  | -1.96443000 | 1.81146000  | -1.02444900 | H                  | -2.73071200 | -3.03735300 | 1.19400400  |
| H                  | -2.58321300 | 1.56324600  | 0.60854000  | H                  | -1.81951100 | -1.79271300 | 2.05093100  |
| H                  | -0.91228500 | 2.09362800  | 0.37560200  |                    |             |             |             |
| C                  | -2.39070800 | -0.89194300 | -0.54506600 | cAAc1.CH.anion     |             |             |             |
| H                  | -3.27980000 | -0.75366600 | 0.07270600  | -520.95523862 a.u. |             |             |             |
| H                  | -2.66281900 | -0.64256400 | -1.57231400 | C                  | -0.06968400 | -4.06624600 | 0.11549900  |
| H                  | -2.09634900 | -1.94115500 | -0.50620300 | C                  | 1.02271500  | -4.83884600 | 0.62781100  |
| C                  | 1.96825300  | 1.30869000  | -0.29017100 | C                  | 0.67166000  | -6.18903700 | 0.59378200  |
| H                  | 2.75976100  | 1.44185100  | 0.45005300  | C                  | -0.63302300 | -6.29442200 | 0.06268900  |
| H                  | 2.42363700  | 1.33132700  | -1.28388300 | C                  | -1.09027000 | -5.00953600 | -0.22874800 |
| H                  | 1.28475700  | 2.15356000  | -0.20441000 | H                  | -2.04914200 | -4.77176700 | -0.66567300 |
| C                  | 2.23147800  | -1.17039600 | -0.27933500 | H                  | -1.18142800 | -7.21319800 | -0.09971500 |
| H                  | 2.60688600  | -1.17013100 | -1.30622400 | H                  | 1.28983700  | -7.01129200 | 0.93031300  |
| H                  | 3.08719400  | -1.07432700 | 0.39243400  | H                  | 1.94161200  | -4.44620800 | 1.03686600  |
| H                  | 1.75094100  | -2.13099900 | -0.08699100 | C                  | -0.15965700 | -2.65633100 | -0.01660200 |
| H                  | 1.16332400  | -0.36209600 | 2.20140100  | C                  | -1.42783200 | -1.80969500 | -0.06084400 |
| C                  | -1.54114400 | -0.31343000 | 2.39386200  | C                  | -0.85557400 | -0.41106100 | 0.06337900  |
| H                  | -1.07816000 | -0.85841700 | 3.21675600  | C                  | 0.48007200  | -0.48248400 | 0.18419300  |
| H                  | -1.65892600 | 0.73380500  | 2.70165600  | N                  | 0.93204700  | -1.77881500 | 0.17848500  |
| H                  | -2.52579000 | -0.74391400 | 2.21369000  | C                  | 2.30140900  | -2.11427000 | -0.11679700 |
|                    |             |             |             | H                  | 2.83717500  | -2.49638900 | 0.75609600  |
| cAAc1.BH.neutral   |             |             |             | H                  | 2.33035700  | -2.88708200 | -0.88743400 |
| -507.68416524 a.u. |             |             |             | H                  | 2.82002200  | -1.22347300 | -0.47805500 |
| C                  | 0.00927900  | -3.99903600 | 0.12259500  | H                  | 1.19650600  | 0.32346700  | 0.26928400  |
| B                  | 1.25465800  | -4.95075600 | 0.26022800  | H                  | -1.45235100 | 0.48898500  | 0.08387300  |
| C                  | 0.65072300  | -6.36450200 | 0.27801800  | C                  | -2.22637500 | -1.94669900 | -1.37431000 |
| C                  | -0.72522400 | -6.24240800 | 0.16793600  | H                  | -2.66964200 | -2.93823300 | -1.46959700 |
| C                  | -1.11934200 | -4.89781800 | 0.07731200  | H                  | -3.03142000 | -1.20358800 | -1.40066900 |
| H                  | -2.15510000 | -4.60808300 | -0.01454900 | H                  | -1.57059200 | -1.77786200 | -2.22872400 |
| H                  | -1.43482300 | -7.06053700 | 0.15090500  | C                  | -2.36986700 | -2.13504500 | 1.11685100  |
| H                  | 1.13918800  | -7.32670400 | 0.35855600  | H                  | -3.24413600 | -1.47509600 | 1.10148600  |
| H                  | 2.40991900  | -4.68928800 | 0.33635000  | H                  | -2.70165600 | -3.17309600 | 1.06218500  |
| C                  | -0.13337800 | -2.63112200 | 0.04980600  | H                  | -1.84420900 | -1.99567200 | 2.06212300  |
| C                  | -1.43473900 | -1.82482100 | -0.08556200 |                    |             |             |             |
| C                  | -0.92977500 | -0.40285800 | -0.11133500 | cAAc1.neutral      |             |             |             |
| C                  | 0.39154200  | -0.41410500 | -0.01047200 | -328.60878443 a.u. |             |             |             |
| N                  | 0.88063400  | -1.72415000 | 0.08566800  | C                  | -0.19962100 | -2.58638100 | 0.07165900  |
| C                  | 2.28444800  | -2.02817600 | 0.20679000  | C                  | -1.44244600 | -1.73302900 | 0.05209700  |
| H                  | 2.48149900  | -2.57187500 | 1.13137900  | C                  | -0.82248000 | -0.34886600 | 0.06051200  |
| H                  | 2.61587800  | -2.65105100 | -0.62473500 | C                  | 0.50590500  | -0.45129700 | -0.05371600 |
| H                  | 2.84025500  | -1.09324700 | 0.20710800  | N                  | 0.90063500  | -1.78045300 | -0.12719000 |
| H                  | 1.09507400  | 0.40403100  | 0.00591700  | C                  | 2.25922600  | -2.23550300 | 0.00745200  |
| H                  | -1.56748600 | 0.46206100  | -0.19883200 | H                  | 2.51960500  | -2.43058100 | 1.05289900  |
| C                  | -2.16225500 | -2.13285200 | -1.40234400 | H                  | 2.39351700  | -3.15720400 | -0.55978700 |
| H                  | -2.53163900 | -3.15573200 | -1.43192800 | H                  | 2.93608600  | -1.48241600 | -0.39322500 |

|   |             |             |             |
|---|-------------|-------------|-------------|
| H | 1.25494500  | 0.32535000  | -0.09958300 |
| H | -1.39034600 | 0.56790800  | 0.09488800  |
| C | -2.26259400 | -1.95525200 | -1.23529500 |
| H | -2.64634500 | -2.97747400 | -1.26894600 |
| H | -3.11236000 | -1.26946000 | -1.27145600 |
| H | -1.64304500 | -1.78601700 | -2.11627500 |
| C | -2.34491000 | -1.98185400 | 1.26934000  |
| H | -3.20738900 | -1.31119600 | 1.24983100  |
| H | -2.71256100 | -3.01030700 | 1.26573700  |
| H | -1.79284700 | -1.81594500 | 2.19380600  |
| H | -0.14948400 | -3.63379000 | -0.19274700 |

cAAc2.BH.neutral  
-661.33719822 a.u.

|   |             |             |             |
|---|-------------|-------------|-------------|
| C | 0.02250100  | -3.97554400 | 0.11685800  |
| B | 1.24702000  | -4.90536400 | 0.44824600  |
| C | 0.65403400  | -6.32320600 | 0.46167900  |
| C | -0.70121600 | -6.22136600 | 0.18629200  |
| C | -1.09202600 | -4.88730300 | -0.00370700 |
| H | -2.11124400 | -4.61425700 | -0.23121700 |
| H | -1.39785200 | -7.04808400 | 0.12094800  |
| H | 1.13371200  | -7.27464800 | 0.64989700  |
| H | 2.37225800  | -4.61630000 | 0.69238200  |
| C | -0.12003000 | -2.61122500 | 0.02385600  |
| C | -1.43506800 | -1.81846200 | -0.07243700 |
| C | -0.94563500 | -0.39081400 | -0.01947100 |
| C | 0.44289900  | -0.38897800 | 0.03009100  |
| N | 0.90524900  | -1.70934200 | 0.01455400  |
| C | -1.64265300 | 0.79684100  | -0.02700500 |
| C | -0.93301400 | 1.99732700  | 0.02484700  |
| C | 0.45279100  | 1.98520300  | 0.08381700  |
| C | 1.16791300  | 0.78934600  | 0.08939500  |
| H | -2.72569500 | 0.80253700  | -0.06989900 |
| H | -1.46413000 | 2.93939200  | 0.02445200  |
| H | 0.99423100  | 2.92094000  | 0.13177300  |
| H | 2.24699200  | 0.79816200  | 0.15169700  |
| C | 2.30757600  | -2.03986500 | -0.04562600 |
| H | 2.69459300  | -2.32982700 | 0.93220800  |
| H | 2.45130200  | -2.87418400 | -0.72969400 |
| H | 2.85471300  | -1.17549300 | -0.41388200 |
| C | -2.13635400 | -2.05710800 | -1.41916400 |
| H | -1.45624500 | -1.84807500 | -2.24540300 |
| H | -2.49125800 | -3.08021500 | -1.51838000 |
| H | -2.99133100 | -1.38385900 | -1.50263700 |
| C | -2.36827100 | -2.09774200 | 1.11080300  |
| H | -2.72650200 | -3.12466000 | 1.11103600  |
| H | -1.85314200 | -1.91586500 | 2.05417700  |
| H | -3.23006800 | -1.43011600 | 1.05726100  |

cAAc2.CH.anion  
-674.61683797 a.u.

|   |             |             |             |
|---|-------------|-------------|-------------|
| C | -0.07189700 | -4.03777700 | 0.08854800  |
| C | 1.00400900  | -4.73145600 | 0.73060000  |
| C | 0.68873600  | -6.08868500 | 0.78493400  |
| C | -0.57492000 | -6.27521100 | 0.17855200  |
| C | -1.04362200 | -5.03326200 | -0.24579300 |
| H | -1.97016000 | -4.85745600 | -0.77425000 |
| H | -1.08556500 | -7.22092300 | 0.05360600  |
| H | 1.29995000  | -6.86287600 | 1.22978500  |
| H | 1.87533300  | -4.26844100 | 1.17272900  |
| C | -0.18471800 | -2.64494800 | -0.15028500 |
| C | -1.46654400 | -1.81694900 | -0.14300600 |
| C | -0.92039700 | -0.40952100 | 0.01285600  |
| C | 0.48530900  | -0.46126900 | 0.08775300  |
| N | 0.90963600  | -1.75125000 | 0.01001600  |
| C | -1.56813700 | 0.80049100  | 0.06365100  |
| C | -0.82768500 | 1.98672400  | 0.17897900  |
| C | 0.55904100  | 1.92574900  | 0.22920600  |
| C | 1.23876800  | 0.71108900  | 0.17957900  |
| H | -2.65132200 | 0.84015800  | 0.00427400  |
| H | -1.33260300 | 2.94297900  | 0.22129300  |
| H | 1.13021600  | 2.84347800  | 0.31136700  |
| H | 2.31954500  | 0.67810900  | 0.23127100  |
| C | 2.27424700  | -2.07367800 | -0.31556500 |
| H | 2.92234200  | -2.05725400 | 0.56648700  |
| H | 2.30067800  | -3.07314400 | -0.74231300 |
| H | 2.66321900  | -1.35209800 | -1.04325500 |
| C | -2.27389200 | -1.93516100 | -1.44819700 |
| H | -1.64676600 | -1.68221800 | -2.30356600 |
| H | -2.64009500 | -2.95369400 | -1.57806100 |
| H | -3.13178600 | -1.25453700 | -1.43021700 |
| C | -2.37497400 | -2.18128500 | 1.04405100  |
| H | -2.69339000 | -3.22111100 | 0.96513100  |
| H | -1.83135500 | -2.06563300 | 1.98230100  |
| H | -3.25514900 | -1.53108900 | 1.06528400  |

cAAc2.neutral  
-482.26202251 a.u.

|   |             |             |             |
|---|-------------|-------------|-------------|
| C | -0.19490900 | -2.55427500 | -0.03663400 |
| C | -1.47755600 | -1.76472700 | -0.03040600 |
| C | -0.92447100 | -0.34975500 | 0.00728600  |
| C | 0.47617100  | -0.39210000 | 0.01997500  |
| N | 0.89598600  | -1.70582200 | -0.00605300 |
| C | -1.57167100 | 0.86473400  | 0.02882400  |
| C | -0.81842100 | 2.04183200  | 0.06313100  |
| C | 0.56883400  | 1.98289400  | 0.07529400  |
| C | 1.24301500  | 0.76479300  | 0.05394800  |
| H | -2.65499500 | 0.91120200  | 0.01934500  |

|   |             |             |             |                    |             |             |             |
|---|-------------|-------------|-------------|--------------------|-------------|-------------|-------------|
| H | -1.31665800 | 3.00154100  | 0.08026700  | C                  | -2.34306800 | -2.08626100 | 1.17381400  |
| H | 1.14136300  | 2.90125100  | 0.10190800  | H                  | -2.72051600 | -3.10557900 | 1.22672300  |
| H | 2.32454200  | 0.72601400  | 0.06358600  | H                  | -1.80296000 | -1.87489800 | 2.09718800  |
| C | 2.27605600  | -2.10309400 | -0.00188100 | H                  | -3.19240800 | -1.40400400 | 1.10910100  |
| H | 2.78303100  | -1.74657100 | 0.89896800  |                    |             |             |             |
| H | 2.33061500  | -3.18881600 | -0.02634200 | cAAc3.CH.anion     |             |             |             |
| H | 2.80016300  | -1.70575300 | -0.87544000 | -648.14640142 a.u. |             |             |             |
| C | -2.31502900 | -2.00611000 | -1.29759200 | C                  | -0.02539300 | -4.06677500 | 0.11327600  |
| H | -1.73348300 | -1.77865400 | -2.19068600 | C                  | 1.13451300  | -4.91450600 | 0.30184900  |
| H | -2.63329600 | -3.04955200 | -1.34592300 | C                  | 0.72164900  | -6.22219700 | 0.31289500  |
| H | -3.20744200 | -1.37574600 | -1.29298100 | C                  | -0.69593000 | -6.25737200 | 0.12935800  |
| C | -2.33824600 | -2.06364300 | 1.20866700  | C                  | -1.14799100 | -4.96880500 | 0.01455600  |
| H | -2.65699000 | -3.10804500 | 1.20312500  | H                  | -2.17584200 | -4.68449900 | -0.13259600 |
| H | -1.77340500 | -1.87772800 | 2.12187600  | H                  | -1.30679900 | -7.14797200 | 0.08792700  |
| H | -3.23063500 | -1.43327900 | 1.21651800  | H                  | 1.36370600  | -7.08187700 | 0.44426000  |
| H | -0.06958400 | -3.62351600 | -0.05877900 | H                  | 2.15380900  | -4.60217500 | 0.44034100  |
|   |             |             |             | C                  | -0.12545300 | -2.67128200 | 0.05196000  |
|   |             |             |             | C                  | -1.42262900 | -1.86409600 | -0.04598400 |
|   |             |             |             | C                  | -0.93249500 | -0.42904900 | -0.02809600 |
|   |             |             |             | C                  | 0.43384400  | -0.42876100 | 0.04038100  |
|   |             |             |             | N                  | 0.88106600  | -1.79169400 | 0.07459600  |
|   |             |             |             | B                  | -1.72129500 | 0.87429800  | -0.08604400 |
|   |             |             |             | C                  | -0.89757500 | 2.17359200  | -0.05241700 |
|   |             |             |             | C                  | 0.47256100  | 2.15819200  | 0.02205300  |
|   |             |             |             | B                  | 1.27703600  | 0.85387400  | 0.07662100  |
|   |             |             |             | H                  | -2.92525600 | 0.88235700  | -0.15522300 |
|   |             |             |             | H                  | -1.39162400 | 3.14631700  | -0.08708300 |
|   |             |             |             | H                  | 0.99166300  | 3.11814500  | 0.04329200  |
|   |             |             |             | H                  | 2.47716600  | 0.85347800  | 0.14729800  |
|   |             |             |             | C                  | 2.28089300  | -2.13212800 | 0.10966100  |
|   |             |             |             | H                  | 2.54624200  | -2.58575700 | 1.06721500  |
|   |             |             |             | H                  | 2.51267500  | -2.84065600 | -0.68684800 |
|   |             |             |             | H                  | 2.85234300  | -1.22016000 | -0.02726800 |
|   |             |             |             | C                  | -2.15318200 | -2.13025700 | -1.37112400 |
|   |             |             |             | H                  | -1.47943200 | -1.95655700 | -2.21133600 |
|   |             |             |             | H                  | -2.53464900 | -3.14811000 | -1.43941500 |
|   |             |             |             | H                  | -2.98344000 | -1.42650700 | -1.45267600 |
|   |             |             |             | C                  | -2.34367700 | -2.11658000 | 1.15438600  |
|   |             |             |             | H                  | -2.72111700 | -3.13819500 | 1.17796500  |
|   |             |             |             | H                  | -1.80710900 | -1.92629700 | 2.08490300  |
|   |             |             |             | H                  | -3.18222200 | -1.42013900 | 1.09906300  |
|   |             |             |             |                    |             |             |             |
|   |             |             |             | cAAc3.neutral      |             |             |             |
|   |             |             |             | -455.74333709 a.u. |             |             |             |
|   |             |             |             | C                  | -0.19054500 | -2.57234600 | -0.03083600 |
|   |             |             |             | C                  | -1.46549300 | -1.79446600 | -0.02345400 |
|   |             |             |             | C                  | -0.94601300 | -0.37328800 | 0.00671900  |
|   |             |             |             | C                  | 0.43394600  | -0.40143200 | 0.01427700  |
|   |             |             |             | N                  | 0.82473200  | -1.77935000 | -0.00974200 |

|   |             |             |             |
|---|-------------|-------------|-------------|
| B | -1.68411400 | 0.96044000  | 0.02788100  |
| C | -0.78530400 | 2.21751200  | 0.05682000  |
| C | 0.58000400  | 2.15606200  | 0.06365900  |
| B | 1.34228600  | 0.82053500  | 0.04295200  |
| H | -2.88136900 | 1.01774200  | 0.02179500  |
| H | -1.24096500 | 3.20680600  | 0.07282100  |
| H | 1.12991200  | 3.09551100  | 0.08461300  |
| H | 2.53620800  | 0.73132000  | 0.04813300  |
| C | 2.22078400  | -2.18747600 | -0.00935000 |
| H | 2.69751100  | -1.79043300 | 0.88405400  |
| H | 2.28332500  | -3.27215900 | -0.02958300 |
| H | 2.70781100  | -1.75691100 | -0.88142000 |
| C | -2.28149500 | -2.08607000 | -1.29410700 |
| H | -1.69936700 | -1.87092400 | -2.19011200 |
| H | -2.61461100 | -3.12560700 | -1.32154000 |
| H | -3.15594500 | -1.43532300 | -1.29395400 |
| C | -2.29614800 | -2.13414500 | 1.22559200  |
| H | -2.62932200 | -3.17390000 | 1.20948300  |
| H | -1.72452000 | -1.95344800 | 2.13585300  |
| H | -3.17068500 | -1.48367600 | 1.24008800  |
| H | -0.06763500 | -3.64790100 | -0.05064200 |

NHC1.BH.neutral  
-484.43617847 a.u.

|   |             |             |             |
|---|-------------|-------------|-------------|
| C | -0.92026700 | 0.07053800  | -0.00451300 |
| B | -1.87132500 | 1.18966900  | 0.51150700  |
| C | -3.28193700 | 0.60750100  | 0.27940300  |
| C | -3.13490200 | -0.63576400 | -0.29327600 |
| C | -1.76158700 | -0.97314800 | -0.45651200 |
| H | -1.43849300 | -1.89085200 | -0.93166900 |
| H | -3.93620300 | -1.29652000 | -0.60119100 |
| H | -4.25455200 | 1.03194000  | 0.49290300  |
| H | -1.57884700 | 2.23297700  | 1.01003100  |
| C | 0.48388700  | 0.01282000  | -0.01123500 |
| N | 1.29022600  | -1.08827200 | 0.05210500  |
| C | 2.61788800  | -0.70597700 | 0.03096800  |
| H | 3.41565100  | -1.42503100 | 0.07243000  |
| N | 1.33741900  | 1.07392700  | -0.06910500 |
| C | 2.64544700  | 0.63649500  | -0.03749000 |
| H | 3.47292200  | 1.32139800  | -0.07412300 |
| C | 0.84270300  | -2.44721100 | 0.27211200  |
| H | 1.64215700  | -2.99645000 | 0.76507600  |
| H | -0.03940100 | -2.42995300 | 0.90980300  |
| H | 0.59326000  | -2.94228300 | -0.66607900 |
| C | 0.93849500  | 2.45786400  | -0.21788200 |
| H | 0.06954300  | 2.50742200  | -0.87188900 |
| H | 0.66929400  | 2.89323700  | 0.74261900  |
| H | 1.76940700  | 3.00746600  | -0.65532100 |

NHC1.CH.anion  
-497.67892375 a.u.

|   |             |             |             |
|---|-------------|-------------|-------------|
| C | 0.80058600  | -0.21385100 | 0.02225400  |
| C | 0.10859400  | 0.79001700  | 0.74694700  |
| C | 0.82603000  | 1.98795000  | 0.63329900  |
| C | 1.96872300  | 1.74209600  | -0.15657800 |
| C | 1.96052300  | 0.39132900  | -0.52619900 |
| H | 2.73493400  | -0.12901900 | -1.07614400 |
| H | 2.72935400  | 2.46665200  | -0.41799300 |
| H | 0.54499800  | 2.94000500  | 1.06565300  |
| H | -0.83655500 | 0.64477600  | 1.25511000  |
| C | 0.40257200  | -1.60091200 | -0.08729200 |
| N | 0.07405300  | -2.24809000 | -1.31723300 |
| C | -0.63188900 | -3.39894100 | -1.00770100 |
| H | -0.90622000 | -4.11096000 | -1.76970900 |
| N | -0.47743400 | -2.19717800 | 0.86545800  |
| C | -0.96621800 | -3.37174600 | 0.29135400  |
| H | -1.58697000 | -4.05197200 | 0.85158200  |
| C | 0.99953100  | -2.19583600 | -2.41411800 |
| H | 0.55336300  | -2.67260500 | -3.28908000 |
| H | 1.21923300  | -1.15305500 | -2.64047800 |
| H | 1.94651000  | -2.70087800 | -2.16289700 |
| C | -0.03720500 | -2.22681200 | 2.24138600  |
| H | 0.23581000  | -1.21708700 | 2.54253100  |
| H | -0.84705000 | -2.59058400 | 2.87748600  |
| H | 0.84239100  | -2.87920500 | 2.35706800  |

NHC1.neutral  
-305.34038288 a.u.

|   |             |             |             |
|---|-------------|-------------|-------------|
| C | 0.49432100  | 0.04396000  | 0.25991900  |
| N | 1.32518400  | -1.08312400 | 0.41615500  |
| C | 2.61360700  | -0.70950600 | 0.06237800  |
| H | 3.41216300  | -1.42912400 | 0.00305200  |
| N | 1.38198700  | 1.13369700  | 0.16201900  |
| C | 2.64782300  | 0.62511900  | -0.09055000 |
| H | 3.48139000  | 1.27136600  | -0.30640100 |
| C | 0.80630900  | -2.40897700 | 0.19126200  |
| H | 1.56269900  | -3.14473000 | 0.46139200  |
| H | -0.06967400 | -2.56720500 | 0.82032200  |
| H | 0.51359100  | -2.55271700 | -0.85510700 |
| C | 0.92951800  | 2.39883000  | -0.35990700 |
| H | 0.63839700  | 2.31682200  | -1.41335700 |
| H | 0.06630700  | 2.73929900  | 0.21197300  |
| H | 1.72368800  | 3.13740700  | -0.25877300 |
| H | -0.36424300 | 0.14196100  | 0.92283500  |

NHC2.BH.neutral  
-638.08506728 a.u.

|   |            |             |            |
|---|------------|-------------|------------|
| C | 1.62894400 | -5.44853100 | 0.03946000 |
|---|------------|-------------|------------|

|                    |             |             |             |                    |             |             |             |
|--------------------|-------------|-------------|-------------|--------------------|-------------|-------------|-------------|
| B                  | 2.23664200  | -6.40719600 | 1.10576300  | N                  | 0.64354300  | -3.24780100 | -0.56301600 |
| C                  | 1.85852600  | -7.81213200 | 0.59346000  | H                  | -0.55097300 | -0.74583900 | -1.36124800 |
| C                  | 1.16446900  | -7.65850500 | -0.58929700 | H                  | 0.55995600  | 1.40743100  | -0.66614800 |
| C                  | 1.00519800  | -6.29049800 | -0.92372200 | H                  | 2.62863500  | 1.40887600  | 0.60348600  |
| H                  | 0.53387000  | -5.96152000 | -1.84096500 | H                  | 3.72590500  | -0.74246200 | 1.32574100  |
| H                  | 0.78343900  | -8.45803400 | -1.21264800 | C                  | 3.76930000  | -3.65407900 | 1.13278100  |
| H                  | 2.06387900  | -8.78633000 | 1.01774800  | H                  | 3.96938800  | -4.68293000 | 0.84197300  |
| H                  | 2.81059700  | -6.11976700 | 2.10952100  | H                  | 4.55650900  | -2.99442700 | 0.76034900  |
| C                  | 1.60618300  | -4.05651600 | -0.00095000 | H                  | 3.74718400  | -3.58926600 | 2.22414400  |
| C                  | 2.17654100  | -1.90137300 | 0.35111700  | C                  | -0.61285000 | -3.65445400 | -1.13154900 |
| C                  | 1.01277100  | -1.91777500 | -0.42138300 | H                  | -0.59037500 | -3.60357100 | -2.22364300 |
| C                  | 0.40625100  | -0.74692200 | -0.83864700 | H                  | -0.81946300 | -4.67825600 | -0.82777600 |
| C                  | 1.00144800  | 0.45062100  | -0.45401000 | H                  | -1.39583200 | -2.98515900 | -0.76750300 |
| C                  | 2.16036600  | 0.46737100  | 0.31699500  |                    |             |             |             |
| C                  | 2.76865100  | -0.71171000 | 0.73600100  |                    |             |             |             |
| N                  | 2.52168900  | -3.21987300 | 0.58194500  | NHC2.neutral       |             |             |             |
| N                  | 0.67904900  | -3.24733800 | -0.61317600 | -458.99625419 a.u. |             |             |             |
| H                  | -0.48709600 | -0.75665900 | -1.44803700 | C                  | -0.59707700 | 0.03117900  | -0.07132400 |
| H                  | 0.55428400  | 1.38566400  | -0.76259400 | C                  | 1.56311400  | 0.69653400  | 0.15105700  |
| H                  | 2.59695600  | 1.41559900  | 0.59949900  | C                  | 1.54680700  | -0.70914500 | 0.04808900  |
| H                  | 3.66077800  | -0.69400800 | 1.34666700  | C                  | 2.72069700  | -1.43369300 | -0.03587800 |
| C                  | 3.75534600  | -3.63324100 | 1.21216900  | C                  | 3.92573200  | -0.72137500 | 0.00677900  |
| H                  | 4.09551700  | -4.55704000 | 0.74944500  | C                  | 3.94175500  | 0.65975500  | 0.10794900  |
| H                  | 4.49730200  | -2.85109400 | 1.05910200  | C                  | 2.75355200  | 1.39830100  | 0.17157100  |
| H                  | 3.61812800  | -3.80841200 | 2.27848600  | N                  | 0.25441900  | 1.11754500  | 0.18604400  |
| C                  | -0.59169800 | -3.67673000 | -1.15349100 | N                  | 0.22868700  | -1.10044900 | 0.02357400  |
| H                  | -0.53231900 | -3.86274500 | -2.22636600 | H                  | 2.71183200  | -2.51063200 | -0.13711500 |
| H                  | -0.90109700 | -4.58878000 | -0.64781000 | H                  | 4.86028800  | -1.26276500 | -0.05338500 |
| H                  | -1.32645600 | -2.89478200 | -0.96721600 | H                  | 4.88865500  | 1.18242300  | 0.12572900  |
|                    |             |             |             | H                  | 2.76970900  | 2.47841300  | 0.22834100  |
|                    |             |             |             | C                  | -0.15211000 | 2.48819200  | 0.03996600  |
| NHC2.CH.anion      |             |             |             | H                  | -1.21029800 | 2.57249700  | 0.28121500  |
| -651.35076858 a.u. |             |             |             | H                  | 0.41199500  | 3.11624400  | 0.72963900  |
| C                  | 1.57235900  | -5.51832800 | 0.01232800  | H                  | 0.00576800  | 2.84949000  | -0.98144400 |
| C                  | 2.02090000  | -6.35984700 | 1.06967400  | C                  | -0.20911800 | -2.42543400 | -0.31996100 |
| C                  | 1.84317300  | -7.68654600 | 0.67492000  | H                  | 0.33920500  | -3.16012000 | 0.26986200  |
| C                  | 1.28792500  | -7.69297800 | -0.62291700 | H                  | -1.26936700 | -2.51956000 | -0.09174400 |
| C                  | 1.11849200  | -6.37026700 | -1.03434900 | H                  | -0.05793000 | -2.63759000 | -1.38338700 |
| H                  | 0.76456400  | -6.04019600 | -2.00179300 | H                  | -1.56210400 | 0.00540100  | 0.43343500  |
| H                  | 1.04744600  | -8.57138000 | -1.20636400 |                    |             |             |             |
| H                  | 2.07817100  | -8.55902100 | 1.26938900  | NHC3.BH.neutral    |             |             |             |
| H                  | 2.37693300  | -6.01984200 | 2.03289600  | -611.54157774 a.u. |             |             |             |
| C                  | 1.57685600  | -4.09182600 | 0.00334500  | C                  | 1.63020500  | -5.50542200 | 0.03833500  |
| C                  | 2.18034400  | -1.93034000 | 0.35638400  | B                  | 2.27308900  | -6.46856000 | 1.08154300  |
| C                  | 0.98706000  | -1.93117900 | -0.37692300 | C                  | 1.89161000  | -7.87309300 | 0.57104600  |
| C                  | 0.35456800  | -0.74564600 | -0.77215400 | C                  | 1.16535400  | -7.71695600 | -0.58977300 |
| C                  | 1.00531300  | 0.46044000  | -0.38420700 | C                  | 0.98869500  | -6.34575600 | -0.91083500 |
| C                  | 2.17726900  | 0.46124900  | 0.33349400  | H                  | 0.48694800  | -6.01978300 | -1.81224900 |
| C                  | 2.82035800  | -0.74395200 | 0.73665700  | H                  | 0.77109900  | -8.51387200 | -1.20838200 |
| N                  | 2.51550100  | -3.24666100 | 0.55909300  | H                  | 2.11627400  | -8.84799300 | 0.98387800  |

|   |             |             |             |
|---|-------------|-------------|-------------|
| H | 2.87534300  | -6.19123400 | 2.07123600  |
| C | 1.60079000  | -4.10720000 | 0.00148300  |
| C | 2.17296000  | -1.94879000 | 0.33012000  |
| C | 1.00054600  | -1.96283800 | -0.38107100 |
| B | 0.31540600  | -0.66525800 | -0.84028800 |
| C | 1.00290900  | 0.68404000  | -0.41391300 |
| C | 2.14601800  | 0.70002100  | 0.29169400  |
| B | 2.84427700  | -0.62908000 | 0.75824600  |
| N | 2.52717800  | -3.25929100 | 0.55186600  |
| N | 0.66018500  | -3.28598600 | -0.56837800 |
| H | -0.67560700 | -0.67339200 | -1.49737000 |
| H | 0.55187300  | 1.63020800  | -0.70225500 |
| H | 2.58780500  | 1.65827800  | 0.55284500  |
| H | 3.83078900  | -0.60952000 | 1.42077400  |
| C | 3.74736500  | -3.69484600 | 1.20038700  |
| H | 4.14124700  | -4.55864900 | 0.66732400  |
| H | 4.45929100  | -2.87479900 | 1.17443900  |
| H | 3.55537600  | -3.98755200 | 2.23079000  |
| C | -0.58938700 | -3.73698600 | -1.14630500 |
| H | -0.46626700 | -4.00735700 | -2.19469700 |
| H | -0.94029300 | -4.60650000 | -0.59332600 |
| H | -1.31291900 | -2.93009300 | -1.07009800 |

NHC3.CH.anion

-624.90861695 a.u.

|   |             |             |             |
|---|-------------|-------------|-------------|
| C | 1.57232300  | -5.53699600 | 0.01262500  |
| C | 2.09541500  | -6.37775400 | 1.03692500  |
| C | 1.88398100  | -7.69595300 | 0.65945600  |
| C | 1.24708400  | -7.70207200 | -0.60647100 |
| C | 1.04400700  | -6.38752300 | -1.00087400 |
| H | 0.61825600  | -6.06315600 | -1.93912000 |
| H | 0.97596100  | -8.57993500 | -1.17608100 |
| H | 2.14958400  | -8.56812100 | 1.24030300  |
| H | 2.52328300  | -6.04405200 | 1.97092600  |
| C | 1.57680000  | -4.10971200 | 0.00349800  |
| C | 2.17734400  | -1.95521000 | 0.34499900  |
| C | 0.98987800  | -1.95599900 | -0.36555200 |
| B | 0.28885200  | -0.66789600 | -0.80464600 |
| C | 1.00202200  | 0.61984300  | -0.38246800 |
| C | 2.18148700  | 0.62066300  | 0.32898800  |
| B | 2.88652300  | -0.66605800 | 0.76761400  |
| N | 2.51213100  | -3.29761600 | 0.54494700  |
| N | 0.64657900  | -3.29870700 | -0.54830000 |
| H | -0.73400000 | -0.67637300 | -1.43472200 |
| H | 0.57599400  | 1.58853900  | -0.64802100 |
| H | 2.61363700  | 1.58996200  | 0.58216000  |
| H | 3.90931700  | -0.67294800 | 1.39780400  |
| C | 3.74644600  | -3.73475300 | 1.15285300  |
| H | 4.04840400  | -4.68198500 | 0.71032100  |

|   |             |             |             |
|---|-------------|-------------|-------------|
| H | 4.49716200  | -2.96779800 | 0.97495200  |
| H | 3.63107500  | -3.86914600 | 2.23006200  |
| C | -0.59052000 | -3.73574400 | -1.15059300 |
| H | -0.47606300 | -3.88462900 | -2.22599300 |
| H | -0.89846100 | -4.67530100 | -0.69599000 |
| H | -1.33634300 | -2.96182800 | -0.98253400 |

NHC3.neutral

-432.51865580 a.u.

|   |             |             |             |
|---|-------------|-------------|-------------|
| C | -0.50439200 | 0.02208200  | -0.01686700 |
| C | 1.61013500  | 0.69671100  | 0.03256800  |
| C | 1.59702000  | -0.69314200 | -0.05313900 |
| B | 2.87237000  | -1.53970200 | -0.10057000 |
| C | 4.15474100  | -0.71007100 | -0.04467400 |
| C | 4.16771100  | 0.66438500  | 0.04007800  |
| B | 2.90122900  | 1.51855800  | 0.08801200  |
| N | 0.27562800  | 1.09338300  | 0.05205900  |
| N | 0.25527000  | -1.06404500 | -0.08098600 |
| H | 2.83442400  | -2.73358800 | -0.17428600 |
| H | 5.11942300  | -1.21421500 | -0.07215700 |
| H | 5.14173200  | 1.14986100  | 0.07361600  |
| H | 2.88582100  | 2.71295900  | 0.16155900  |
| C | -0.17318600 | 2.46905900  | 0.13513200  |
| H | -1.26045600 | 2.49679000  | 0.13311700  |
| H | 0.20833900  | 2.91741500  | 1.05048900  |
| H | 0.21438200  | 3.02607600  | -0.71574500 |
| C | -0.21942300 | -2.43082700 | -0.16697000 |
| H | 0.15223200  | -2.99522000 | 0.68614100  |
| H | -1.30701800 | -2.43763100 | -0.17149600 |
| H | 0.15890200  | -2.88641600 | -1.08008200 |
| H | -1.58158000 | 0.03245400  | -0.02022700 |
